# Supplementary material for: Rhodium-catalyzed regioselective alkynylations of 8-pyrrole-appended BODIPYs
Source: Royal Society of Chemistry journal article supplement (doi:10.1039/d4qo01420k), 2024-01-01
Supplement: d4qo01420k1.pdf [file d4qo01420k1.pdf]

## Supporting Information

### Rhodium-catalyzed regioselective alkynylations of 8-pyrrole- appended BODIPYs

Machongyang Wang, Shuibo Fan, Cong Duan, Hui Shu, Ruiquan Ding, Mingbo Zhou\*,  
Ling Xu, Yutao Rao, Atsuhiko Osuka, and Jianxin Song\*

Key Laboratory of Chemical Biology and Traditional Chinese Medicine Research (Ministry of Education), Key Laboratory of the Assembly and Application of Organic Functional Molecules of Hunan Province, College of Chemistry and Chemical Engineering, Hunan Normal University, Changsha, Hunan 410081, China.

E-mail: zhoumingbo@hunnu.edu.cn, and jxsong@hunnu.edu.cn

## Table of Contents

|                                                              |    |
|--------------------------------------------------------------|----|
| 1. Instruments and materials .....                           | 1  |
| 2. General procedure for syntheses and spectral data.....    | 1  |
| 3. NMR spectra .....                                         | 11 |
| 4. UV/vis absorption and fluorescence spectra and data ..... | 47 |
| 5. X-ray crystal data.....                                   | 49 |
| 6. HR-MALDI-TOF mass data.....                               | 66 |
| 7. References.....                                           | 68 |

## 1. Instruments and materials

<sup>1</sup>H NMR (500 MHz) and <sup>13</sup>C NMR (126 MHz) spectra were taken on a Bruker AVANCE-500 spectrometer and Quantum-I Plus 500 MHz, and chemical shifts were reported as the delta scale in ppm. The residual peak of CDCl<sub>3</sub> was used as internal reference for <sup>1</sup>H NMR ( $\delta = 7.26$  ppm) and the solvent CDCl<sub>3</sub> was used as internal reference for <sup>13</sup>C NMR ( $\delta = 77.0$  ppm). UV/vis absorption spectra were recorded on a Shimadzu UV-3600 spectrometer. Measurement of photoluminescence spectra and the fluorescent quantum yields were measured in CH<sub>2</sub>Cl<sub>2</sub> using an integrating sphere by an Edinburgh FLS1000 machine. The MALDI-TOF mass spectra were obtained with a Bruker ultrafle Xtreme MALDI-TOF/TOF spectrometer with matrix. X-Ray data were taken on a Bruker SMART APEX X-Ray diffractometer equipped with a large area CCD detector. BODIPYs **1a-1e** and brominated alkynes **2a-2l** were prepared according to the literature procedures.<sup>S1-S8</sup> Unless otherwise noted, materials obtained from commercial suppliers were used without further purification.

## 2. General procedure for syntheses and spectral data

### 2.1. Synthesis of alkynylated BODIPYs **3aa-3aj**, **3ba-bb**, **3bd**, **3bg-h**, **3bj**, and **3ca**

A mixture of **1** (0.1 mmol), alkyne (0.15 mmol), [Cp\*<sup>\*</sup>RhCl<sub>2</sub>]<sub>2</sub> (0.005 mmol), Na<sub>2</sub>CO<sub>3</sub> (0.20 mmol), AgOAc (0.12 mmol) in *o*-xylene was stirred at 70 °C for about 12 h. After cooling to room temperature, the mixture was passed through a short silica-gel column (CH<sub>2</sub>Cl<sub>2</sub> as an eluent). After removal of solvents in *vacuo*, the crude product was purified by silica-gel (CH<sub>2</sub>Cl<sub>2</sub>/*n*-hexane as an eluent) and recrystallized from CH<sub>2</sub>Cl<sub>2</sub>/*n*-hexane to afford **3** as red solids.

**3aa**: yield: 78%, <sup>1</sup>H NMR (500 MHz, CDCl<sub>3</sub>, 298 K)  $\delta = 8.38$  (br, 1H), 7.56 (d,  $J = 2.5$  Hz, 1H), 7.29 (d,  $J = 9.0$  Hz, 2H), 7.25 (d,  $J = 9.0$  Hz, 2H), 6.99 (td,  $J = 2.5, 1.5$  Hz, 1H), 6.56 (d,  $J = 2.5$  Hz, 1H), 6.44 (ddd,  $J = 3.5, 2.5, 1.5$  Hz, 1H), 6.38 (td,  $J = 3.5, 2.5$  Hz, 1H), 6.15 (s, 1H), 2.60 (s, 3H), 1.68 (s, 3H) and 1.30 (s, 9H) ppm; <sup>13</sup>C NMR (126 MHz, CDCl<sub>3</sub>, 298 K)  $\delta = 162.8, 151.6, 148.4, 137.1, 135.6, 134.0, 133.1, 131.8, 125.1, 123.8, 122.1, 121.3, 120.8, 120.2, 120.2, 112.7, 110.2, 98.0, 83.2, 34.8, 31.2, 15.2$  and  $14.0$  ppm; HRMS (MALDI-TOF)  $m/z$ : [M]<sup>+</sup> Calcd for C<sub>27</sub>H<sub>26</sub>BF<sub>2</sub>N<sub>3</sub> 441.2188; Found: 441.2189.

**3ab**: yield: 74%, <sup>1</sup>H NMR (500 MHz, CDCl<sub>3</sub>, 298 K)  $\delta = 8.34$  (br, 1H), 7.58 (br, 1H), 7.34-7.30 (m, 2H), 7.28-7.26 (m, 3H), 6.99 (td,  $J = 3.0, 1.5$  Hz, 1H), 6.58 (d,  $J = 2.5$  Hz, 1H), 6.45 (ddd,  $J = 4.0,$

3.0, 1.5 Hz, 1H), 6.37 (dt,  $J = 4.0, 3.0$  Hz, 1H), 6.17 (s, 1H), 2.61 (s, 3H) and 1.70 (s, 3H) ppm;  $^{13}\text{C}$  NMR (126 MHz,  $\text{CDCl}_3$ , 298 K)  $\delta = 163.2, 148.6, 136.9, 135.7, 134.1, 133.1, 132.0, 128.2, 128.1, 123.9, 123.3, 121.6, 121.2, 120.9, 120.2, 112.7, 110.2, 97.5, 83.7, 15.3$  and 14.1 ppm; HRMS (MALDI-TOF)  $m/z$ :  $[\text{M}]^+$  Calcd for  $\text{C}_{23}\text{H}_{18}\text{BF}_2\text{N}_3$  385.1562; Found: 385.1561.

**3ac**: yield: 73%,  $^1\text{H}$  NMR (500 MHz,  $\text{CDCl}_3$ , 298 K)  $\delta = 8.38$  (br, 1H), 7.56 (br, 1H), 7.20 (d,  $J = 8.0$  Hz, 2H), 7.07 (d,  $J = 8.0$  Hz, 2H), 6.95-6.94 (m, 1H), 6.55 (d,  $J = 2.5$  Hz, 1H), 6.44-6.43 (m, 1H), 6.34-6.33 (m, 1H), 6.14 (s, 1H), 2.59 (s, 3H), 2.33 (s, 3H) and 1.67 (s, 3H) ppm;  $^{13}\text{C}$  NMR (126 MHz,  $\text{CDCl}_3$ , 298 K)  $\delta = 162.8, 148.4, 138.4, 137.0, 135.6, 134.0, 133.0, 131.9, 128.8, 123.8, 121.9, 121.2, 120.7, 120.1, 112.6, 110.2, 97.9, 83.1, 21.5, 15.2$  and 14.0 ppm; HRMS (MALDI-TOF)  $m/z$ :  $[\text{M}]^+$  Calcd for  $\text{C}_{24}\text{H}_{20}\text{BF}_2\text{N}_3$  399.1718, Found: 399.1719.

**3ad**: yield: 55%,  $^1\text{H}$  NMR (500 MHz,  $\text{CDCl}_3$ , 298 K)  $\delta = 8.42$  (br, 1H), 7.85 (d,  $J = 8.5$  Hz, 2H), 7.56 (d,  $J = 2.5$  Hz, 1H), 7.38 (d,  $J = 8.5$  Hz, 2H), 6.98 (td,  $J = 2.5, 1.5$  Hz, 1H), 6.59 (d,  $J = 2.5$  Hz, 1H), 6.45 (td,  $J = 3.0, 2.5, 1.5$  Hz, 1H), 6.39-6.33 (m, 1H), 6.18 (s, 1H), 2.61 (s, 3H), 2.58 (s, 3H) and 1.69 (s, 3H) ppm;  $^{13}\text{C}$  NMR (126 MHz,  $\text{CDCl}_3$ , 298 K)  $\delta = 197.4, 164.1, 149.0, 136.6, 136.0, 135.9, 134.3, 132.8, 132.0, 128.3, 127.9, 124.2, 121.2, 120.9, 120.4, 120.2, 112.7, 110.3, 96.3, 87.0, 26.6, 15.4$  and 14.0 ppm; HRMS (MALDI-TOF)  $m/z$ :  $[\text{M}]^+$  Calcd for  $\text{C}_{25}\text{H}_{20}\text{BF}_2\text{N}_3\text{O}$  427.1667, Found: 427.1673.

**3ae**: yield: 73%,  $^1\text{H}$  NMR (500 MHz,  $\text{CDCl}_3$ , 298 K)  $\delta = 8.38$  (br, 1H), 7.56 (d,  $J = 2.5$  Hz, 1H), 7.39 (d,  $J = 8.5$  Hz, 2H), 7.16 (d,  $J = 8.5$  Hz, 2H), 6.94 (dd,  $J = 4.0, 2.0$  Hz, 1H), 6.56 (d,  $J = 2.5$  Hz, 1H), 6.42 (dt,  $J = 4.0, 2.0$  Hz, 1H), 6.33 (dt,  $J = 4.0, 2.5$  Hz, 1H), 6.16 (s, 1H), 2.60 (s, 3H) and 1.67 (s, 3H) ppm;  $^{13}\text{C}$  NMR (126 MHz,  $\text{CDCl}_3$ , 298 K)  $\delta = 163.7, 148.8, 136.8, 135.9, 134.1, 133.4, 132.9, 131.3, 124.1, 122.4, 122.2, 121.2, 120.9, 120.7, 120.1, 112.6, 110.2, 96.2, 84.8, 15.4$  and 14.0 ppm; HRMS (MALDI-TOF)  $m/z$ :  $[\text{M}]^+$  Calcd for  $\text{C}_{23}\text{H}_{17}\text{BF}_2\text{N}_3\text{Br}$  463.0667, Found: 463.0662.

**3af**: yield: 71%,  $^1\text{H}$  NMR (500 MHz,  $\text{CDCl}_3$ , 298 K)  $\delta = 8.39$  (br, 1H), 7.57-7.55 (m, 1H), 7.23 (br, 4H), 6.94 (td,  $J = 3.0, 1.5$  Hz, 1H), 6.56 (d,  $J = 2.5$  Hz, 1H), 6.42 (ddd,  $J = 4.0, 2.5, 1.5$  Hz, 1H), 6.33 (dt,  $J = 4.0, 2.5$  Hz, 1H), 6.15 (s, 1H), 2.60 (s, 3H) and 1.67 (s, 3H) ppm;  $^{13}\text{C}$  NMR (126 MHz,  $\text{CDCl}_3$ , 298 K)  $\delta = 163.7, 148.8, 136.8, 135.9, 134.1, 133.4, 132.9, 131.3, 124.1, 122.4, 122.2, 121.2, 120.9, 120.7, 120.1, 112.6, 110.2, 96.2, 84.8, 15.4$  and 14.0 ppm; HRMS (MALDI-TOF)  $m/z$ :  $[\text{M}]^+$  Calcd for  $\text{C}_{23}\text{H}_{17}\text{BClF}_2\text{N}_3$  419.1172, Found: 419.1185.

**3ag**: yield: 41%,  $^1\text{H}$  NMR (500 MHz,  $\text{CDCl}_3$ , 298 K)  $\delta = 8.32$  (br, 1H), 7.56 (br, 1H), 7.24 (d,  $J =$

5.0 Hz, 1H), 7.11 (d,  $J = 3.5$  Hz, 1H), 7.04 (dd,  $J = 4.5, 3.0$  Hz, 1H), 6.94 (dd,  $J = 5.0, 3.5$  Hz, 1H), 6.55 (d,  $J = 2.5$  Hz, 1H), 6.45-6.39 (m, 2H), 6.17 (s, 1H), 2.61 (s, 3H) and 1.72 (s, 3H) ppm;  $^{13}\text{C}$  NMR (126 MHz,  $\text{CDCl}_3$ , 298 K)  $\delta = 163.3, 148.6, 137.1, 135.8, 135.3, 134.4, 134.1, 133.0, 129.4, 127.9, 127.0, 124.0, 123.6, 121.2, 120.4, 112.7, 110.5, 90.6, 87.6, 15.4$  and 14.2 ppm; HRMS (MALDI-TOF)  $m/z$ :  $[\text{M-F}]^+$  Calcd for  $\text{C}_{21}\text{H}_{16}\text{BFN}_3\text{S}$  372.1142, Found: 372.1138.

**3ah**: yield: 71%,  $^1\text{H}$  NMR (500 MHz,  $\text{CDCl}_3$ , 298 K)  $\delta = 8.27$  (br, 1H), 7.55 (br, 1H), 6.94 (td,  $J = 3.0, 1.5$  Hz, 1H), 6.54 (d,  $J = 2.5$  Hz, 1H), 6.38 (td,  $J = 3.0, 2.5, 1.5$  Hz, 1H), 6.26 (dt,  $J = 4.0, 2.5$  Hz, 1H), 6.15 (s, 1H), 2.59 (s, 3H), 1.66 (s, 3H) and 1.02 (br, 21H) ppm;  $^{13}\text{C}$  NMR (126 MHz,  $\text{CDCl}_3$ , 298 K)  $\delta = 163.0, 148.6, 136.6, 135.7, 133.9, 133.3, 123.8, 122.4, 121.7, 121.3, 120.2, 113.1, 110.3, 100.3, 100.1, 18.8, 15.3, 14.1$  and 11.4 ppm; HRMS (MALDI-TOF)  $m/z$ :  $[\text{M}]^+$  Calcd for  $\text{C}_{26}\text{H}_{34}\text{BF}_2\text{N}_3\text{Si}$  465.2583, Found: 465.2588.

**3ai**: yield: 75%,  $^1\text{H}$  NMR (500 MHz,  $\text{CDCl}_3$ , 298 K)  $\delta = 8.26$  (br, 1H), 7.50 (br, 1H), 6.96-6.94 (m, 1H), 6.51 (d,  $J = 2.5$  Hz, 1H), 6.36-6.34 (m, 1H), 6.29-6.26 (m, 1H), 6.15 (s, 1H), 2.59 (s, 3H), 1.70 (s, 3H), 0.93 (t,  $J = 8.0$  Hz, 9H) and 0.55 (d,  $J = 8.0$  Hz, 6H) ppm;  $^{13}\text{C}$  NMR (126 MHz,  $\text{CDCl}_3$ , 298 K)  $\delta = 163.2, 148.7, 136.6, 135.7, 134.5, 133.1, 123.9, 121.7, 121.3, 119.9, 112.7, 110.0, 100.5, 98.9, 15.3, 14.2, 7.5$  and 4.5 ppm; HRMS (MALDI-TOF)  $m/z$ :  $[\text{M-F}]^+$  Calcd for  $\text{C}_{23}\text{H}_{28}\text{BF}_2\text{N}_3\text{Si}$  423.2114, Found: 423.2122.

**3aj**: yield: 46%,  $^1\text{H}$  NMR (500 MHz,  $\text{CDCl}_3$ , 298 K)  $\delta = 8.24$  (br, 1H), 7.53 (d,  $J = 2.5$  Hz, 1H), 6.96 (td,  $J = 3.0, 1.5$  Hz, 1H), 6.42 (d,  $J = 2.5$  Hz, 1H), 6.34 (td,  $J = 3.0, 2.5, 1.5$  Hz, 1H), 6.32-6.27 (m, 1H), 6.14 (s, 1H), 2.59 (s, 3H), 2.16 (t,  $J = 7.0$  Hz, 2H), 1.70 (s, 3H), 1.47-1.35 (m, 2H), 1.28 (dt,  $J = 7.0, 3.0$  Hz, 4H) and 0.89 (t,  $J = 7.0$  Hz, 3H) ppm;  $^{13}\text{C}$  NMR (126 MHz,  $\text{CDCl}_3$ , 298 K)  $\delta = 162.3, 148.2, 137.4, 135.4, 134.2, 133.3, 123.6, 123.2, 121.4, 120.5, 119.8, 112.3, 109.9, 99.8, 74.1, 31.3, 28.4, 22.3, 20.2, 15.3, 14.2$  and 14.1 ppm; HRMS (MALDI-TOF)  $m/z$ :  $[\text{M}]^+$  Calcd for  $\text{C}_{22}\text{H}_{24}\text{BF}_2\text{N}_3$  379.2031, Found: 379.2045.

**3ba**: yield: 22%,  $^1\text{H}$  NMR (500 MHz,  $\text{CDCl}_3$ , 298 K)  $\delta = 9.21$  (br, 1H), 7.89 (br, 1H), 7.78 (br, 1H), 7.32 (d,  $J = 8.0$  Hz, 2H), 7.25 (m, 3H), 7.22-7.19 (m, 1H), 6.97 (d,  $J = 3.5$  Hz, 1H), 6.72 (d,  $J = 2.0$  Hz, 1H), 6.61-6.57 (m, 1H), 6.54-6.52 (m, 1H) and 1.31 (s, 9H) ppm; UV/vis ( $\text{CH}_2\text{Cl}_2$ ):  $\lambda_{\text{max}}$  ( $\epsilon$  [ $\text{M}^{-1}\text{cm}^{-1}$ ]) = 520 (60424), 447 (16990) nm; HRMS (MALDI-TOF)  $m/z$ :  $[\text{M+H}]^+$  Calcd for  $\text{C}_{25}\text{H}_{23}\text{BF}_2\text{N}_3$  414.1952, Found: 414.1947.

**3bb**: yield: 24%,  $^1\text{H}$  NMR (500 MHz,  $\text{CDCl}_3$ , 298 K)  $\delta = 9.20$  (br, 1H), 7.90 (br, 1H), 7.78 (d,  $J =$

2.5 Hz, 1H), 7.33-7.28 (m, 5H), 7.25 (br, 1H), 7.20 (td,  $J = 2.5, 1.5$  Hz, 1H), 6.97 (ddd,  $J = 4.0, 2.5, 1.5$  Hz, 1H), 6.72 (d,  $J = 2.5$  Hz, 1H), 6.59 (dd,  $J = 4.5, 2.0$  Hz, 1H) and 6.52 (dt,  $J = 4.0, 2.5$  Hz, 1H) ppm; HRMS (MALDI-TOF)  $m/z$ :  $[M]^+$  Calcd for  $C_{21}H_{14}BF_2N_3$  357.1249, Found: 357.1251.

**3bd**: yield: 8%,  $^1H$  NMR (500 MHz,  $CDCl_3$ , 298 K)  $\delta = 9.09$  (br, 1H), 7.94 (br, 1H), 7.90-7.85 (m, 2H), 7.79 (d,  $J = 2.5$  Hz, 1H), 7.40-7.37 (m, 2H), 7.29 (d,  $J = 4.0$  Hz, 1H), 7.20 (td,  $J = 3.0, 1.5$  Hz, 1H), 6.98 (ddd,  $J = 4.0, 2.5, 1.5$  Hz, 1H), 6.79-6.73 (m, 1H), 6.66-6.61 (m, 1H), 6.53 (dt,  $J = 4.0, 2.5$  Hz, 1H) and 2.60 (s, 3H) ppm; HRMS (MALDI-TOF)  $m/z$ :  $[M]^+$  Calcd for  $C_{23}H_{16}BF_2N_3O$  399.1354, Found: 399.1364.

**3bg**: yield: 20%,  $^1H$  NMR (500 MHz,  $CDCl_3$ , 298 K)  $\delta = 9.12$  (br, 1H), 7.90 (br, 1H), 7.77 (d,  $J = 2.0$  Hz, 1H), 7.30 (dd,  $J = 5.0, 1.5$  Hz, 1H), 7.26-7.24 (m, 2H), 7.15 (dd,  $J = 4.0, 1.5$  Hz, 1H), 6.97 (dd,  $J = 5.0, 4.0$  Hz, 1H), 6.94 (ddd,  $J = 4.0, 2.5, 1.5$  Hz, 1H), 6.70 (d,  $J = 2.5$  Hz, 1H), 6.59 (dd,  $J = 4.0, 2.0$  Hz, 1H) and 6.54 (dt,  $J = 4.0, 2.5$  Hz, 1H) ppm; HRMS (MALDI-TOF)  $m/z$ :  $[M]^+$  Calcd for  $C_{19}H_{12}BF_2N_3S$  363.0813, Found: 363.0840.

**3bh**: yield: 23%,  $^1H$  NMR (500 MHz,  $CDCl_3$ , 298 K)  $\delta = 9.31$  (br, 1H), 7.86 (br, 1H), 7.72 (d,  $J = 2.0$  Hz, 1H), 7.24 (d,  $J = 4.5$  Hz, 1H), 7.20 (dd,  $J = 4.5$  Hz, 3.0 Hz, 1H), 6.96-6.95 (m, 1H), 6.71 (d,  $J = 2.5$  Hz, 1H), 6.57 (dd,  $J = 4.5, 2.0$  Hz, 1H), 6.47-6.44 (m, 1H) and 1.04-1.03 (br, 21H) ppm; HRMS (MALDI-TOF)  $m/z$ :  $[M]^+$  Calcd for  $C_{24}H_{30}BF_2N_3Si$  437.2270, Found: 437.2281.

**3bj**: yield: 15%,  $^1H$  NMR (500 MHz,  $CDCl_3$ , 298 K)  $\delta = 9.10$  (br, 1H), 7.86 (br, 1H), 7.75 (br, 1H), 7.23 (d,  $J = 4.5$  Hz, 1H), 7.17 (dd,  $J = 4.5, 3.0$  Hz, 1H), 6.90-6.84 (td,  $J = 4.0, 1.5$  Hz, 1H), 6.59 (d,  $J = 2.5$  Hz, 1H), 6.56 (dd,  $J = 4.5, 2.0$  Hz, 1H), 6.46 (dd,  $J = 4.5, 3.0$  Hz, 1H), 2.27 (t,  $J = 7.0$  Hz, 2H), 1.45-1.42 (m, 2H), 1.28-1.26 (m, 4H) and 0.89 (t,  $J = 7.0$  Hz, 3H) ppm; HRMS (MALDI-TOF)  $m/z$ :  $[M]^+$  Calcd for  $C_{20}H_{20}BF_2N_3$  351.1718, Found: 351.1710.

**3ca**: yield: 38%,  $^1H$  NMR (500 MHz,  $CDCl_3$ , 298 K)  $\delta = 8.70$  (br, 1H), 7.98 (br, 1H), 7.86 (d,  $J = 2.5$  Hz, 1H), 7.78-7.77 (m, 1H), 7.35-7.34 (m, 1H), 7.2 -7.26 (m, 2H), 7.25-7.24 (m, 1H) 7.05 (dd,  $J = 2.0, 1.0$  Hz, 1H), 7.00 (d,  $J = 8.5$  Hz, 2H), 6.72 (d,  $J = 2.5$  Hz, 1H), 6.61 (dd,  $J = 4.5, 2.0$  Hz, 1H), 6.34 (d,  $J = 8.5$  Hz, 2H) and 1.23 (s, 9H) ppm;  $^{13}C$  NMR (126 MHz,  $CDCl_3$ )  $\delta = 152.1, 145.0, 142.0, 137.7, 136.0, 135.9, 133.3, 132.7, 131.5, 131.3, 128.9, 128.1, 125.8, 125.0, 124.9, 122.3, 121.9, 121.1, 119.3, 118.8, 112.2, 109.5, 101.4, 83.1, 34.7$  and 31.0 ppm; HRMS (MALDI-TOF)  $m/z$ :  $[M-F]^+$  Calcd for  $C_{29}H_{24}BFN_3$  444.2047, Found: 444.2047.

## 2.2. Synthesis of BODIPY dimer **3ak** and trimer **3al**

A mixture of **1a** (0.1 mmol), 1,4-bis(bromoethynyl)benzene **2k** (0.06 mmol), [Cp\*RhCl<sub>2</sub>]<sub>2</sub> (0.006 mmol), Na<sub>2</sub>CO<sub>3</sub> (0.20 mmol), AgOAc (0.12 mmol) in *o*-xylene was stirred at 70 °C for about 16 h. After cooling to room temperature, the mixture was passed through a short silica-gel column (CH<sub>2</sub>Cl<sub>2</sub> as an eluent). After removal of solvents in *vacuo*, the crude product was purified by silica-gel (CH<sub>2</sub>Cl<sub>2</sub>/*n*-hexane as an eluent) and recrystallized from CH<sub>2</sub>Cl<sub>2</sub>/*n*-hexane to afford BODIPY dimer **3ak**.

**3ak**: red solids, yield: 55%, <sup>1</sup>H NMR (500 MHz, Acetone-*d*<sub>6</sub>, 298 K) δ = 10.57 (br, 2H), 7.61 (br, 2H), 7.34 (br, 4H), 7.21 (td, *J* = 3.0, 1.5 Hz, 2H), 6.64 (d, *J* = 2.5 Hz, 2H), 6.48-6.45 (m, 2H), 6.42 (s, 2H), 6.40 (dt, *J* = 4.0, 2.5 Hz, 2H), 2.61 (s, 6H) and 1.73 (s, 6H) ppm; <sup>13</sup>C NMR (126 MHz, Acetone-*d*<sub>6</sub>, 298 K) δ = 163.5, 149.0, 136.3, 135.9, 134.1, 131.6, 124.0, 123.2, 121.1, 120.7, 120.4, 112.1, 109.5, 96.7, 86.0, 14.3 and 13.1 ppm; HRMS (MALDI-TOF) *m/z*: [M]<sup>+</sup> Calcd for C<sub>40</sub>H<sub>30</sub>B<sub>2</sub>F<sub>4</sub>N<sub>6</sub> 692.2654, Found: 692.2657.

A mixture of **1a** (0.1 mmol), 1,3,5-tris(bromoethynyl)benzene **2l** (0.04 mmol), [Cp\*RhCl<sub>2</sub>]<sub>2</sub> (0.01 mmol), Na<sub>2</sub>CO<sub>3</sub> (0.30 mmol), AgOAc (0.18 mmol) in *o*-xylene was stirred at 70 °C for about 16 h. After cooling to room temperature, the mixture was passed through a short silica-gel column (CH<sub>2</sub>Cl<sub>2</sub> as an eluent). After removal of solvents in *vacuo*, the crude product was purified by silica-gel (CH<sub>2</sub>Cl<sub>2</sub>/*n*-hexane as an eluent) and recrystallized from CH<sub>2</sub>Cl<sub>2</sub>/*n*-hexane to afford BODIPY trimer **3al**.

**3al**: purple solids, yield: 42%, <sup>1</sup>H NMR (500 MHz, Acetone-*d*<sub>6</sub>, 298 K) δ = 10.60 (br, 3H), 7.59-7.58 (m, 3H), 7.25 (s, 3H), 7.19 (td, *J* = 3.0, 1.5 Hz, 3H), 6.71 (d, *J* = 2.5 Hz, 3H), 6.52-6.50 (m, 3H), 6.41 (s, 3H), 6.40-6.35 (m, 3H), 2.60 (s, 9H) and 1.72 (s, 9H) ppm; <sup>13</sup>C NMR (126 MHz, Acetone-*d*<sub>6</sub>, 298 K) δ = 163.8, 149.2, 136.1, 134.2, 124.1, 123.8, 121.1, 120.8, 120.5, 112.1, 109.6, 94.9, 84.9, 54.6, 14.4 and 13.1 ppm; HRMS (MALDI-TOF) *m/z*: [M-F]<sup>+</sup> Calcd for C<sub>57</sub>H<sub>42</sub>B<sub>3</sub>F<sub>5</sub>N<sub>9</sub> 980.3762, Found: 980.3762.

## 2.3. Synthesis of di-alkynylated BODIPYs **4ba-4bj** and **4ca-4ea**

A mixture of **1** (0.1 mmol), alkyne (0.3 mmol), [Cp\*RhCl<sub>2</sub>]<sub>2</sub> (0.01 mmol), Na<sub>2</sub>CO<sub>3</sub> (0.40 mmol), AgOAc (0.12 mmol) in *o*-xylene was stirred at 70 °C for about 16 h. After cooling to room temperature, the mixture was passed through a short silica-gel column (CH<sub>2</sub>Cl<sub>2</sub> as an eluent). After removal of solvents in *vacuo*, the crude product was purified by silica-gel (CH<sub>2</sub>Cl<sub>2</sub>/*n*-hexane as an

eluent) and recrystallized from CH<sub>2</sub>Cl<sub>2</sub>/*n*-hexane to afford **4** as purple solids.

**4ba**: yield: 72%, <sup>1</sup>H NMR (500 MHz, CDCl<sub>3</sub>, 298 K) δ = 8.99 (br, 1H), 7.80 (d, *J* = 2.5 Hz, 2H), 7.31 (d, *J* = 8.5 Hz, 8H), 7.18-7.17 (m, 1H), 7.11-7.09 (m, 1H), 6.70 (d, *J* = 2.5 Hz, 2H), 6.52 (dd, *J* = 6.0 Hz, 3.0 Hz, 1H) and 1.31 (s, 18H) ppm; <sup>13</sup>C NMR (126 MHz, CDCl<sub>3</sub>, 298 K) δ = 152.3, 141.6, 135.6, 134.2, 131.6, 126.4, 125.2, 124.1, 122.9, 121.6, 119.7, 119.2, 111.6, 100.1, 84.0, 34.9 and 31.1 ppm; UV/vis (CH<sub>2</sub>Cl<sub>2</sub>): λ<sub>max</sub> (ε [M<sup>-1</sup>cm<sup>-1</sup>]) = 453 (14450), 545 (46652) nm; HRMS (MALDI-TOF) *m/z*: [M]<sup>+</sup> Calcd for C<sub>37</sub>H<sub>34</sub>BF<sub>2</sub>N<sub>3</sub> 569.2814, Found: 569.2810.

**4bb**: yield: 61%, <sup>1</sup>H NMR (500 MHz, CDCl<sub>3</sub>, 298 K) δ = 8.96 (br, 1H), 7.82 (d, *J* = 2.0 Hz, 2H), 7.37-7.35 (m, 4H), 7.32-7.27 (m, 6H), 7.16 (td, *J* = 3.0, 1.5 Hz, 1H), 7.11 (ddd, *J* = 4.0, 2.5, 1.5 Hz, 1H), 6.73 (d, *J* = 2.5 Hz, 2H) and 6.49 (dt, *J* = 4.0, 2.5 Hz, 1H) ppm; <sup>13</sup>C NMR (126 MHz, CDCl<sub>3</sub>) δ = 141.7, 135.8, 134.3, 131.8, 128.8, 128.2, 126.1, 124.1, 123.1, 122.7, 121.6, 119.1, 111.6, 99.7 and 84.3 ppm; HRMS (MALDI-TOF) *m/z*: [M]<sup>+</sup> Calcd for C<sub>29</sub>H<sub>18</sub>BF<sub>2</sub>N<sub>3</sub> 457.1562, Found: 457.1558.

**4bc**: yield: 62%, <sup>1</sup>H NMR (500 MHz, CDCl<sub>3</sub>, 298 K) δ = 8.95 (br, 1H), 7.81 (d, *J* = 2.5 Hz, 2H), 7.26-7.25 (m, 4H), 7.15 (td, *J* = 3.0, 1.5 Hz, 1H), 7.12-7.08 (m, 5H), 6.71 (d, *J* = 2.5 Hz, 2H), 6.48 (dt, *J* = 4.0, 2.5 Hz, 1H) and 2.35 (s, 6H) ppm; <sup>13</sup>C NMR (126 MHz, CDCl<sub>3</sub>, 298 K) δ = 141.6, 139.2, 134.2, 131.8, 129.0, 126.3, 124.0, 122.9, 121.6, 119.7, 119.1, 111.5, 100.1, 83.9 and 21.6 ppm; HRMS (MALDI-TOF) *m/z*: [M]<sup>+</sup> Calcd for C<sub>31</sub>H<sub>22</sub>BF<sub>2</sub>N<sub>3</sub> 485.1875, Found: 485.1867.

**4bd**: yield: 25%, <sup>1</sup>H NMR (500 MHz, CDCl<sub>3</sub>, 298 K) δ = 8.89 (s, 1H), 7.88 (d, *J* = 8.5 Hz, 4H), 7.86 (d, *J* = 2.0 Hz, 2H), 7.42 (d, *J* = 8.5 Hz, 4H), 7.15 (td, *J* = 3.0, 1.5 Hz, 1H), 7.09 (ddd, *J* = 4.0, 2.5, 1.5 Hz, 1H), 6.78 (d, *J* = 2.0 Hz, 2H), 6.47 (dt, *J* = 3.0, 2.5 Hz, 1H) and 2.60 (s, 6H) ppm; <sup>13</sup>C NMR (126 MHz, CDCl<sub>3</sub>, 298 K) δ = 197.2, 142.3, 136.6, 136.0, 134.7, 132.0, 128.2, 127.6, 125.8, 124.1, 123.6, 121.6, 118.9, 111.7, 98.8, 87.1 and 26.7 ppm; HRMS (MALDI-TOF) *m/z*: [M]<sup>+</sup> Calcd for C<sub>33</sub>H<sub>22</sub>BF<sub>2</sub>N<sub>3</sub>O<sub>2</sub> 541.1773, Found: 541.1771.

**4be**: yield: 76%, <sup>1</sup>H NMR (500 MHz, CDCl<sub>3</sub>, 298 K) δ = 8.84 (br, 1H), 7.83 (br, 2H), 7.43 (d, *J* = 8.5 Hz, 4H), 7.20 (d, *J* = 8.5 Hz, 4H), 7.12 (td, *J* = 3.0, 1.5 Hz, 1H), 7.05 (tt, *J* = 2.5, 1.5 Hz, 1H), 6.73 (d, *J* = 2.5 Hz, 2H) and 6.44 (dt, *J* = 4.0, 2.5 Hz, 1H) ppm; <sup>13</sup>C NMR (126 MHz, CDCl<sub>3</sub>, 298 K) δ = 142.2, 135.7, 134.5, 133.2, 131.6, 126.0, 123.8, 123.3, 123.27, 121.7, 121.5, 118.6, 111.5, 98.7 and 85.3 ppm; HRMS (MALDI-TOF) *m/z*: [M-F]<sup>+</sup> Calcd for C<sub>29</sub>H<sub>16</sub>BBr<sub>2</sub>FN<sub>3</sub> 593.9788, Found: 593.9783.



**4bf**: yield: 72%, <sup>1</sup>H NMR (500 MHz, CDCl<sub>3</sub>, 298 K)  $\delta$  = 8.86 (br, 1H), 7.83 (d,  $J$  = 2.0 Hz, 2H), 7.27 - 7.26 (m, 8H), 7.13 - 7.11 (m, 1H), 7.06 - 7.04 (m, 1H), 6.73 (d,  $J$  = 2.5 Hz, 2H) and 6.45 (dd,  $J$  = 6.0, 2.5 Hz, 1H) ppm; <sup>13</sup>C NMR (126 MHz, CDCl<sub>3</sub>, 298 K)  $\delta$  = 142.0, 135.6, 135.0, 134.4, 128.6, 126.0, 123.7, 123.22, 123.2, 121.4, 121.1, 118.5, 111.4, 98.6 and 85.0 ppm; HRMS (MALDI-TOF) m/z: [M-F]<sup>+</sup> Calcd for C<sub>29</sub>H<sub>16</sub>BCl<sub>2</sub>FN<sub>3</sub> 506.0798, Found: 506.0790.

**4bg**: yield: 55%, <sup>1</sup>H NMR (500 MHz, CDCl<sub>3</sub>, 298 K)  $\delta$  = 8.83 (br, 1H), 7.81 (d,  $J$  = 2.5 Hz, 2H), 7.31 (d,  $J$  = 5.0 Hz, 2H), 7.25-7.23 (m, 1H), 7.19 (d,  $J$  = 4.0 Hz, 2H), 7.01 (dt,  $J$  = 4.0, 2.0 Hz, 1H), 6.98 (dd,  $J$  = 5.0, 4.0 Hz, 2H), 6.70 (d,  $J$  = 2.5 Hz, 2H) and 6.59-6.57 (m, 1H) ppm; <sup>13</sup>C NMR (126 MHz, CDCl<sub>3</sub>, 298 K)  $\delta$  = 141.9, 135.4, 134.6, 133.5, 128.7, 127.3, 125.9, 124.0, 122.9, 122.4, 121.4, 118.4, 111.9, 93.2 and 88.4 ppm; HRMS (MALDI-TOF) m/z: [M]<sup>+</sup> Calcd for C<sub>25</sub>H<sub>14</sub>BF<sub>2</sub>N<sub>3</sub>S<sub>2</sub> 469.0690, Found: 469.0682.

**4bh**: yield: 79%, <sup>1</sup>H NMR (500 MHz, CDCl<sub>3</sub>, 298 K)  $\delta$  = 10.26 (br, 1H), 7.67 (d,  $J$  = 2.0 Hz, 2H), 7.31 (ddd,  $J$  = 4.0, 2.5, 1.5 Hz, 1H), 7.22 (td,  $J$  = 2.5, 1.5 Hz, 1H), 6.68 (d,  $J$  = 2.0 Hz, 2H), 6.38 (dt,  $J$  = 4.0, 2.5 Hz, 1H) and 1.17-1.05 (m, 42H) ppm; <sup>13</sup>C NMR (126 MHz, CDCl<sub>3</sub>, 298 K)  $\delta$  = 138.7, 137.0, 133.4, 128.1, 127.0, 125.0, 123.7, 123.1, 113.1, 101.9, 100.9, 18.6 and 11.4 ppm; HRMS (MALDI-TOF) m/z: [M]<sup>+</sup> Calcd for C<sub>35</sub>H<sub>50</sub>BF<sub>2</sub>N<sub>3</sub>Si<sub>2</sub> 617.3604, Found: 617.3601.

**4bi**: yield: 79%, <sup>1</sup>H NMR (500 MHz, CDCl<sub>3</sub>, 298 K)  $\delta$  = 9.49 (br, 1H), 7.71 (br, 2H), 7.19 (br, 1H), 7.15 (br, 1H), 6.88 (br, 2H), 6.42-6.35 (m, 1H), 0.99 (t,  $J$  = 8.0 Hz, 18H) and 0.63 (q,  $J$  = 8.0 Hz, 12H) ppm; <sup>13</sup>C NMR (126 MHz, CDCl<sub>3</sub>, 298 K)  $\delta$  = 140.0, 136.5, 134.0, 126.0, 124.4, 123.7, 123.4, 123.39, 122.4, 112.1, 102.4, 100.2, 7.4 and 4.3 ppm; HRMS (MALDI-TOF) m/z: [M-F]<sup>+</sup> Calcd for C<sub>29</sub>H<sub>38</sub>BFN<sub>3</sub>Si<sub>2</sub> 514.2681, Found: 514.2688.

**4bj**: yield: 43%, <sup>1</sup>H NMR (500 MHz, CDCl<sub>3</sub>, 298 K)  $\delta$  = 8.75 (br, 1H), 7.74 (d,  $J$  = 2.0 Hz, 2H), 7.07 (td,  $J$  = 3.5, 1.5 Hz, 1H), 6.89 (td,  $J$  = 2.5, 1.5 Hz, 1H), 6.55 (d,  $J$  = 2.0 Hz, 2H), 6.34 (dt,  $J$  = 3.5, 2.5 Hz, 1H), 2.23 (t,  $J$  = 7.0 Hz, 4H), 1.43 (p,  $J$  = 7.0 Hz, 4H), 1.31-1.26 (m, 8H) and 0.90 (t,  $J$  = 7.0 Hz, 6H) ppm; <sup>13</sup>C NMR (126 MHz, CDCl<sub>3</sub>)  $\delta$  = 141.4, 135.8, 134.2, 127.1, 122.9, 122.5, 121.3, 118.2, 110.5, 101.9, 75.0, 31.1, 28.0, 22.2, 20.1 and 14.0 ppm; HRMS (MALDI-TOF) m/z: [M]<sup>+</sup> Calcd for C<sub>27</sub>H<sub>30</sub>BF<sub>2</sub>N<sub>3</sub> 445.2501, Found: 445.249.

**4ca**: yield: 14%, <sup>1</sup>H NMR (500 MHz, CDCl<sub>3</sub>, 298 K)  $\delta$  = 8.40 (br, 1H), 7.94 (br, 2H), 7.73 (dd,  $J$  = 7.5, 1.5 Hz, 1H), 7.40 (dd,  $J$  = 7.5, 1.5 Hz, 1H), 7.28 (dd, 7.5, 1.5 Hz, 1H), 7.25 (dd, 7.5, 1.5 Hz, 1H), 7.03 (dd,  $J$  = 2.0, 1.0 Hz, 1H), 6.99 (d,  $J$  = 8.5 Hz, 4H), 6.70 (d,  $J$  = 2.5 Hz, 2H), 6.25 (d,  $J$  =

8.5 Hz, 4H) and 1.19 (s, 18H) ppm;  $^{13}\text{C}$  NMR (126 MHz,  $\text{CDCl}_3$ , 298 K)  $\delta$  = 152.2, 145.1, 142.1, 137.8, 132.7, 131.4, 129.0, 128.2, 125.0, 124.96, 122.3, 122.0, 121.2, 119.4, 118.9, 112.3, 109.6, 101.4, 83.7, 34.8, and 31.1 ppm; HRMS (MALDI-TOF)  $m/z$ :  $[\text{M}]^+$  Calcd for  $\text{C}_{41}\text{H}_{36}\text{BF}_2\text{N}_3$  619.2970, Found: 619.2971.

**4da**: yield: 52%,  $^1\text{H}$  NMR (500 MHz,  $\text{CDCl}_3$ , 298 K)  $\delta$  = 8.55 (br, 1H), 7.33 (br, 8H), 7.09 (td,  $J$  = 3.0, 1.5 Hz, 1H), 6.78 (ddd,  $J$  = 4.0, 2.5, 1.5 Hz, 1H), 6.54–6.45 (m, 3H), 2.64 (s, 6H) and 1.34 (s, 18H) ppm;  $^{13}\text{C}$  NMR (126 MHz,  $\text{CDCl}_3$ , 298 K)  $\delta$  = 156.2, 152.0, 135.0, 131.9, 131.4, 126.1, 125.1, 124.0, 121.2, 121.1, 120.0, 115.5, 110.7, 100.0, 83.3, 34.9, 31.2 and 14.8 ppm; HRMS (MALDI-TOF)  $m/z$ :  $[\text{M}]^+$  Calcd for  $\text{C}_{39}\text{H}_{38}\text{BF}_2\text{N}_3$  597.3127, Found: 597.3149.

**4ea**: yield: 66%,  $^1\text{H}$  NMR (500 MHz,  $\text{CDCl}_3$ , 298 K)  $\delta$  = 9.03 (br, 1H), 7.88 (d,  $J$  = 2.5 Hz, 1H), 7.81 (s, 1H), 7.38 (d,  $J$  = 7.0 Hz, 2H), 7.35 (d,  $J$  = 7.0 Hz, 4H), 7.27 (td,  $J$  = 3.0, 1.5 Hz, 1H), 7.20 (ddd,  $J$  = 4.0, 2.5, 1.5 Hz, 1H), 6.78 (d,  $J$  = 2.5 Hz, 1H), 6.60 (dt,  $J$  = 4.0, 2.5 Hz, 1H), 1.35 (s, 9H) and 1.348 (s, 9H) ppm;  $^{13}\text{C}$  NMR (126 MHz,  $\text{CDCl}_3$ )  $\delta$  = 152.6, 152.6, 142.7, 140.1, 135.3, 134.2, 133.46, 131.8, 131.6, 127.5, 125.3, 125.3, 124.8, 123.3, 121.5, 120.0, 119.5, 119.5, 111.8, 111.1, 103.6, 100.8, 83.9, 82.6, 34.9 and 31.1 ppm; HRMS (MALDI-TOF)  $m/z$ :  $[\text{M-F}]^+$  Calcd for  $\text{C}_{37}\text{H}_{33}\text{BBrFN}_3$  628.1935, Found: 628.1929.

#### 2.4. Synthesis of di-alkynylated BODIPYs 5 and 6

A mixture of **4ba** (0.1 mmol), alkyne **2d** (0.15 mmol),  $[\text{Cp}^*\text{RhCl}_2]_2$  (0.005 mmol),  $\text{Na}_2\text{CO}_3$  (0.20 mmol),  $\text{AgOAc}$  (0.12 mmol) in *o*-xylene was stirred at 70 °C for about 12 h. After cooling to room temperature, the mixture was passed through a short silica-gel column ( $\text{CH}_2\text{Cl}_2$  as an eluent). After removal of solvents in *vacuo*, the crude product was purified by silica-gel ( $\text{CH}_2\text{Cl}_2/n$ -hexane as an eluent) and recrystallized from  $\text{CH}_2\text{Cl}_2/n$ -hexane to afford **5**.

**5**: purple solids, yield: 42%,  $^1\text{H}$  NMR (500 MHz,  $\text{CDCl}_3$ , 298 K)  $\delta$  = 9.00 (br, 1H), 7.87 (d,  $J$  = 8.5 Hz, 2H), 7.85 (br, 1H), 7.81 (br, 1H), 7.42 (d,  $J$  = 8.5 Hz, 2H), 7.34–7.29 (m, 4H), 7.10 (m, 1H), 7.17 (td,  $J$  = 3.0, 1.5 Hz, 1H), 6.79 (dd,  $J$  = 5.0, 2.5 Hz, 2H), 6.49 (dt,  $J$  = 5.0, 2.5 Hz, 1H), 2.60 (s, 3H), and 1.31 (s, 9H) ppm;  $^{13}\text{C}$  NMR (126 MHz,  $\text{CDCl}_3$ , 298K)  $\delta$  = 197.2, 152.6, 142.7, 141.1, 136.4, 135.7, 134.4, 131.8, 131.7, 131.6, 128.2, 128.1, 127.7, 127.2, 125.3, 125.2, 124.8, 124.1, 123.3, 123.1, 121.6, 119.5, 119.1, 111.6, 100.9, 98.0, 87.4, 83.9, 34.9, 31.1, 31.1, 29.7 and 26.6 ppm; UV/Vis ( $\text{CH}_2\text{Cl}_2$ ):  $\lambda_{\text{max}}$  ( $\epsilon$  [ $\text{M}^{-1}\text{cm}^{-1}$ ]) = 447 (12617), 545 (48440) nm; HRMS (MALDI-TOF)  $m/z$ :  $[\text{M-F}]^+$  Calcd for  $\text{C}_{35}\text{H}_{28}\text{BFN}_3\text{O}$  536.2310, Found: 536.2309.

A mixture of **4ba** (0.1 mmol), alkyne **2h** (0.15 mmol), [Cp\*RhCl<sub>2</sub>]<sub>2</sub> (0.005 mmol), Na<sub>2</sub>CO<sub>3</sub> (0.20 mmol), AgOAc (0.12 mmol) in *o*-xylene was stirred at 70 °C for about 12 h. After cooling to room temperature, the mixture was passed through a short silica-gel column (CH<sub>2</sub>Cl<sub>2</sub> as an eluent). After removal of solvents in *vacuo*, the crude product was purified by silica-gel (CH<sub>2</sub>Cl<sub>2</sub>/*n*-hexane as an eluent) and recrystallized from CH<sub>2</sub>Cl<sub>2</sub>/*n*-hexane to afford **6**.

**6**: purple solids, yield: 75%, <sup>1</sup>H NMR (500 MHz, CDCl<sub>3</sub>, 298K) δ = 9.27 (br, 1H), 7.78 (s, 1H), 7.74 (s, 1H), 7.3 (q, *J* = 8.5 Hz, 4H), 7.17–7.16 (m, 2H), 6.71–6.69 (m, 2H), 6.45–6.43 (m, 1H), 1.31 (s, 9H), 1.26 (s, 3H) and 1.05 (s, 18H) ppm; <sup>13</sup>C NMR (126 MHz, CDCl<sub>3</sub>, 298K) δ = 152.3, 141.1, 140.3, 136.1, 134.0, 133.7, 131.5, 128.8, 126.0, 125.31, 125.28, 125.0, 124.4, 122.8, 122.6, 121.6, 119.7, 112.1, 102.3, 101.2, 99.4, 84.1, 34.9, 31.1, 18.6 and 11.4 ppm; HRMS (MALDI-TOF) *m/z*: [M-F]<sup>+</sup> Calcd for C<sub>36</sub>H<sub>42</sub>BFN<sub>3</sub>Si 574.3226, Found: 574.3244.

## 2.5. Synthesis of multi-fused compounds 7-9

Under green light, a mixture of corresponding alkynylated BODIPY (0.035 mmol), Cs<sub>2</sub>CO<sub>3</sub> (0.035 mmol) in CH<sub>2</sub>Cl<sub>2</sub>/Acetone (volume ratio is 9:1, 10 mL) was stirred at room temperature for about 6 h. After cooling to room temperature, the mixture was passed through a short silica-gel column (CH<sub>2</sub>Cl<sub>2</sub> as an eluent). After removal of solvents in *vacuo*, the crude product was purified by silica-gel (CH<sub>2</sub>Cl<sub>2</sub>/*n*-hexane as an eluent) and recrystallized from CH<sub>2</sub>Cl<sub>2</sub>/*n*-hexane to afford multi-fused compounds **7-9**.

**7**: orange solids, yield: 34%, <sup>1</sup>H NMR (500 MHz, CDCl<sub>3</sub>, 298 K) δ = 8.47 (br, 1H), 8.42 (s, 1H), 8.13 (d, *J* = 10.0 Hz, 1H), 8.02 (d, *J* = 5.0 Hz, 1H), 7.98-7.96 (m, 2H), 7.88 (d, *J* = 5.0 Hz, 1H), 7.69 (br, 1H), 7.32 (br, 1H), 7.11 (br, 1H), 6.54 (br, 1H) and 1.58 (s, 9H) ppm; <sup>13</sup>C NMR (126 MHz, CDCl<sub>3</sub>, 298 K) δ = 152.9, 136.4, 135.2, 133.8, 130.9, 128.7, 128.5, 127.6, 126.8, 126.6, 123.2, 122.9, 122.7, 121.7, 118.9, 118.7, 114.9, 112.3, 105.0, 35.7 and 31.1 ppm; UV/vis (CH<sub>2</sub>Cl<sub>2</sub>): λ<sub>max</sub> (ε [M<sup>-1</sup>cm<sup>-1</sup>]) = 483 (13152), 500 (17085), 534 (72227) nm; HRMS (MALDI-TOF) *m/z*: [M]<sup>+</sup> Calcd for C<sub>25</sub>H<sub>20</sub>BF<sub>2</sub>N<sub>3</sub> 411.1718; Found: 411.1719.

**8**: orange solids, yield: 20%, <sup>1</sup>H NMR (500 MHz, CDCl<sub>3</sub>, 298 K) δ = 9.65 (d, *J* = 5.0 Hz, 1H), 8.60 (br, 1H), 8.51 (s, 1H), 8.17 (d, *J* = 8.5 Hz, 1H), 7.97-7.94 (m, 3H), 7.59 (d, *J* = 9.0 Hz, 2H), 7.54 (br, 1H), 7.52 (d, *J* = 9.0 Hz, 2H), 7.24 (d, *J* = 2.5 Hz, 1H), 6.80 (dd, *J* = 4.5, 2.5 Hz, 1H), 1.56 (s, 9H) and 1.42 (s, 9H) ppm; <sup>13</sup>C NMR (126 MHz, CDCl<sub>3</sub>, 298 K) δ = 152.7, 151.8, 137.2, 134.5, 132.2, 131.2, 130.9, 129.1, 129.0, 127.6, 127.3, 126.9, 126.1, 125.7, 124.4, 123.1, 122.8, 122.3,

120.6, 120.4, 118.8, 114.9, 113.1, 111.6, 105.2, 95.5, 88.0, 35.7, 35.0, 31.3 and 31.1 ppm; UV/vis (CH<sub>2</sub>Cl<sub>2</sub>):  $\lambda_{\text{max}}$  ( $\epsilon$  [M<sup>-1</sup>cm<sup>-1</sup>]) = 490 (18004), 555 (47092) nm; HRMS (MALDI-TOF) m/z: [M]<sup>+</sup> Calcd for C<sub>37</sub>H<sub>32</sub>BF<sub>2</sub>N<sub>3</sub> 567.2657; Found: 567.2651;

**9**: orange solids, yield: 15%, <sup>1</sup>H NMR (500 MHz, CDCl<sub>3</sub>)  $\delta$  = 9.73 (br, 1H), 8.60 (br, 1H), 8.54 (s, 1H), 8.24-8.14 (m, 1H), 8.06 (s, 1H), 7.96-7.79 (m, 3H), 7.69-7.62 (m, 3H), 7.51-7.44 (m, 3H), 7.32 (br, 1H), 6.76 (s, 1H) ppm; HRMS (MALDI-TOF) m/z: [M]<sup>+</sup> Calcd for C<sub>29</sub>H<sub>16</sub>BF<sub>2</sub>N<sub>3</sub> 455.1405; Found: 455.1425.

### 3. NMR spectra

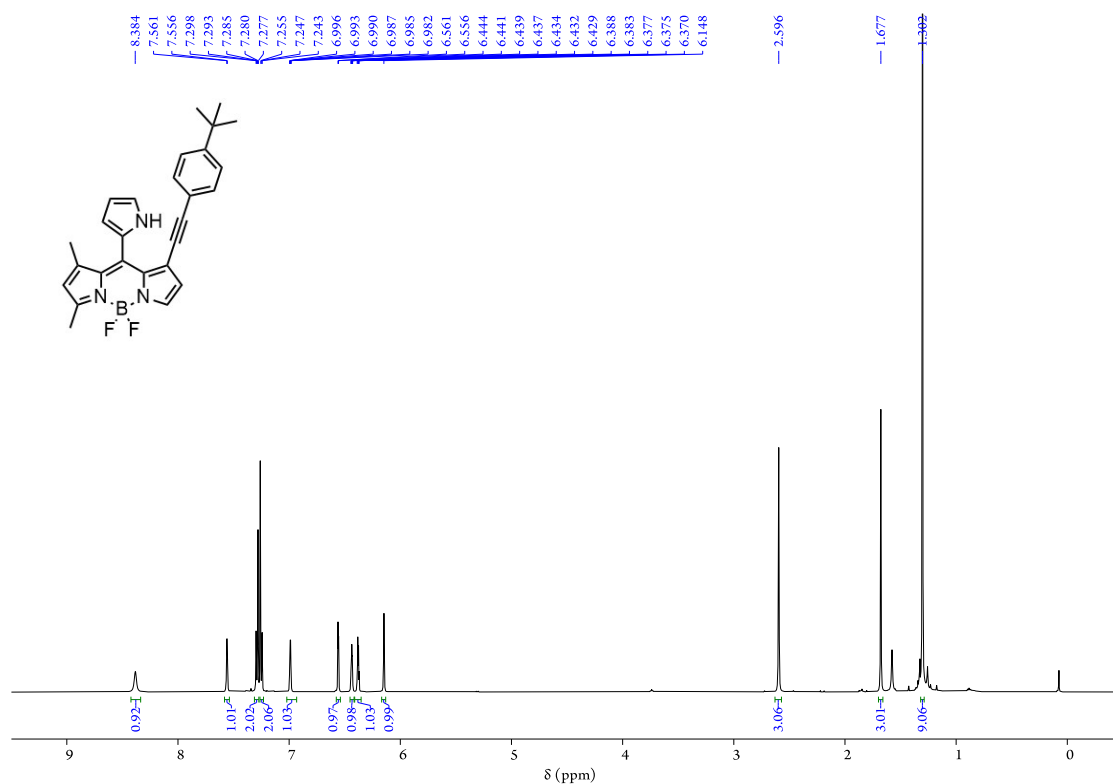

Figure S1 <sup>1</sup>H NMR spectrum of **3aa** in CDCl<sub>3</sub> at 298 K

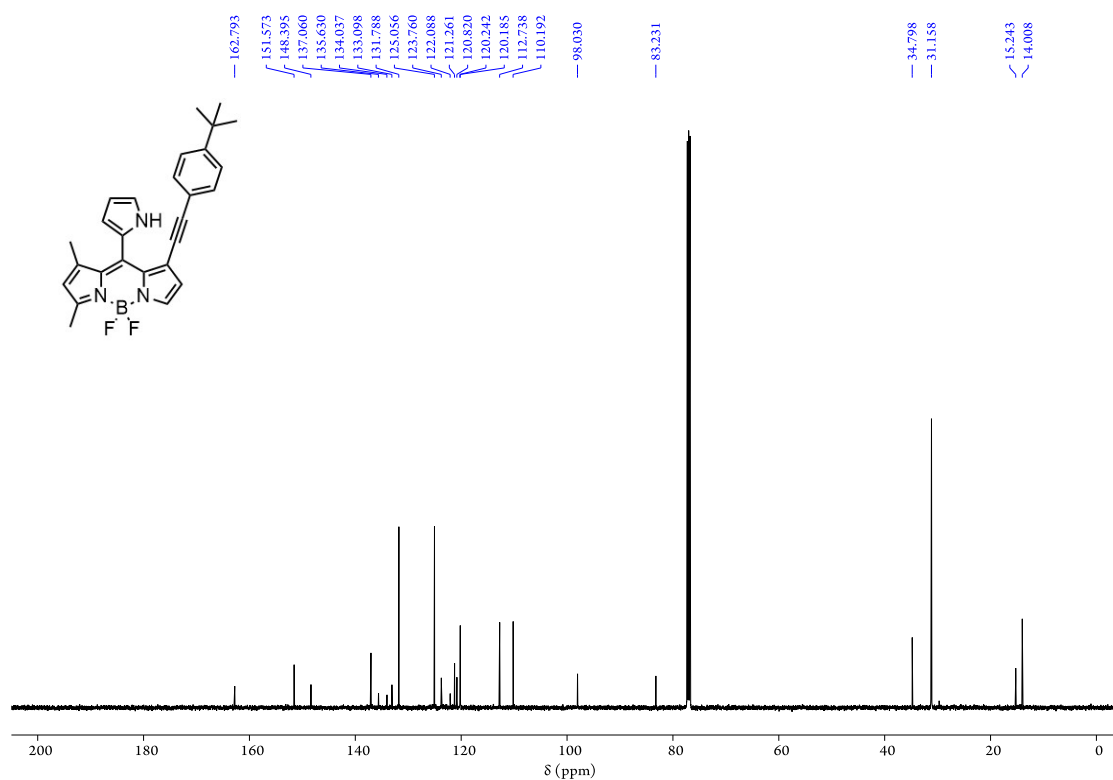

Figure S2. <sup>13</sup>C NMR spectrum of **3aa** in CDCl<sub>3</sub> at 298 K

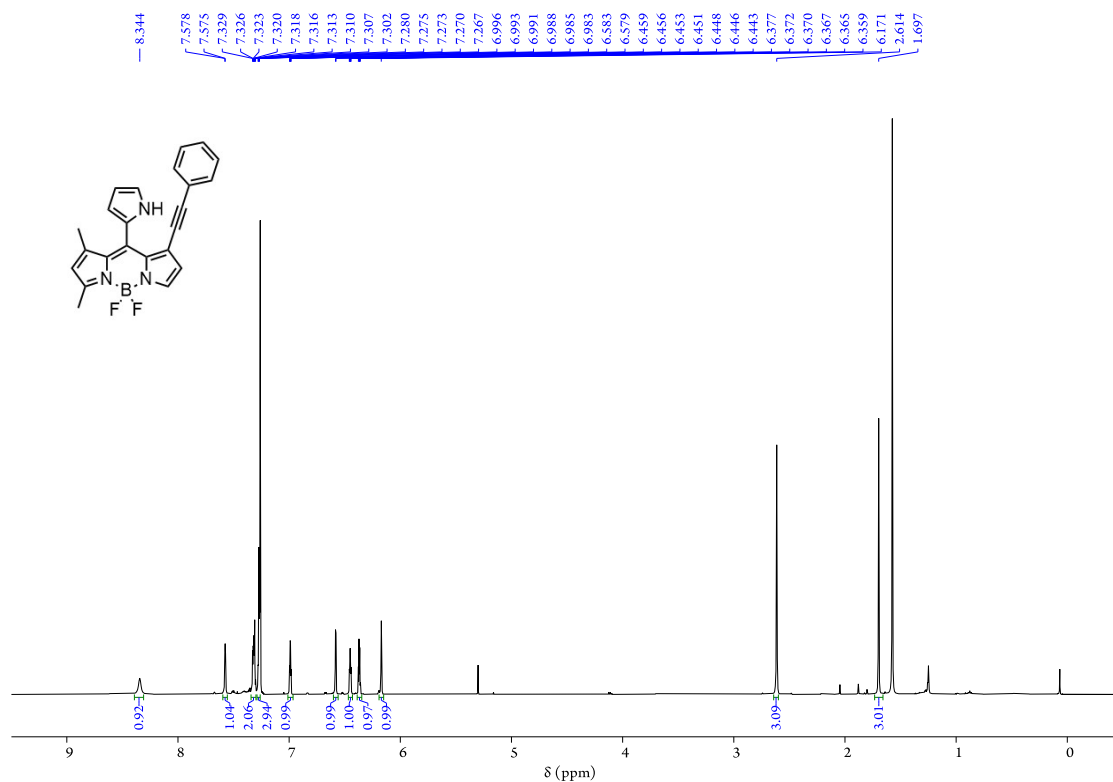

**Figure S3.** <sup>1</sup>H NMR spectrum of **3ab** in CDCl<sub>3</sub> at 298 K

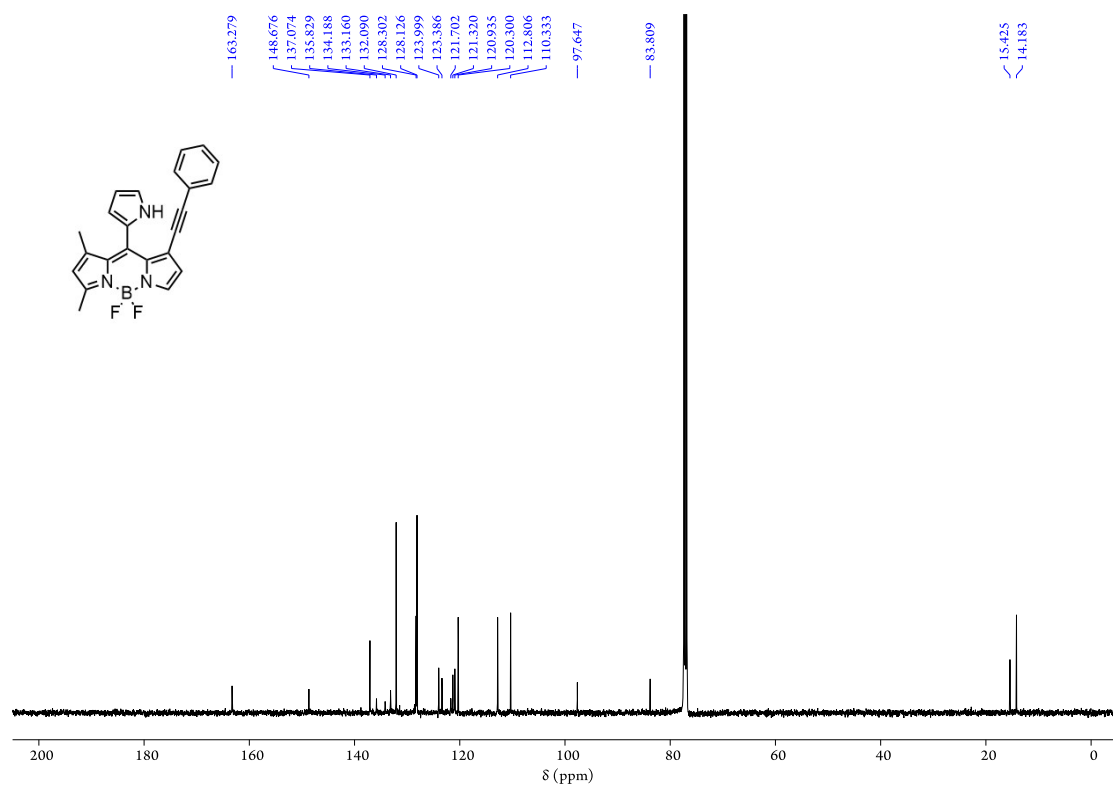

**Figure S4.** <sup>13</sup>C NMR spectrum of **3ab** in CDCl<sub>3</sub> at 298 K

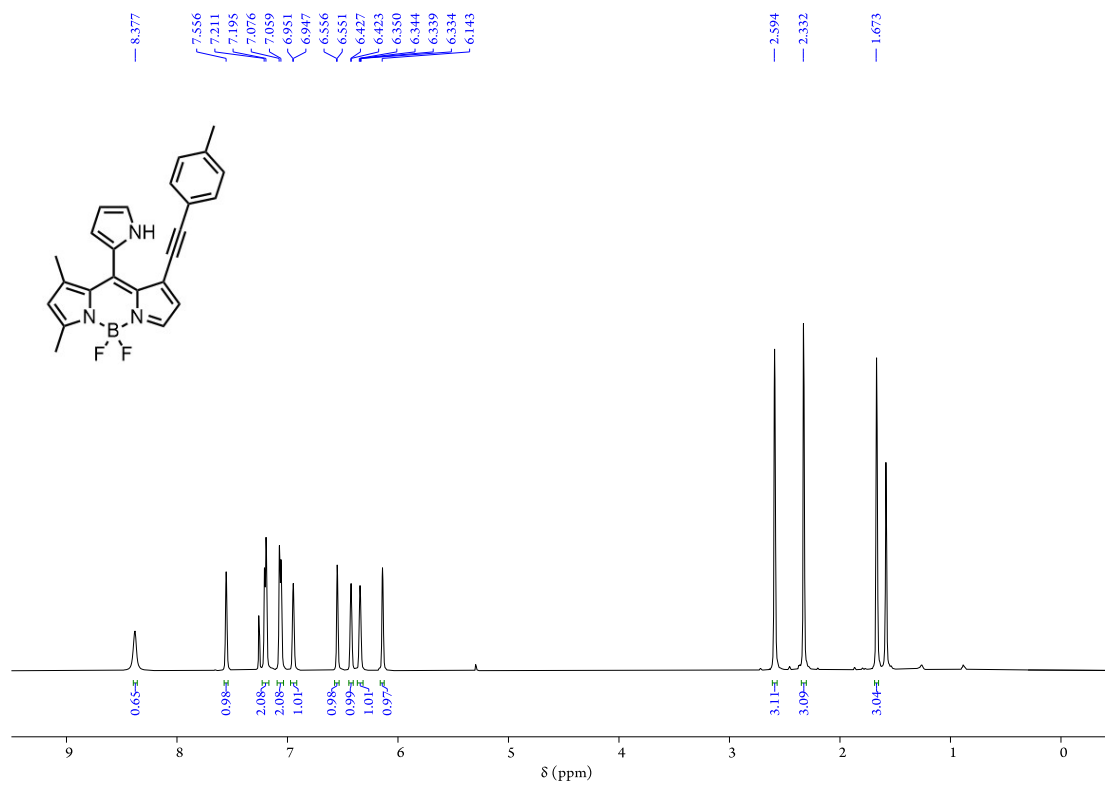

**Figure S5.** <sup>1</sup>H NMR spectrum of **3ac** in CDCl<sub>3</sub> at 298 K

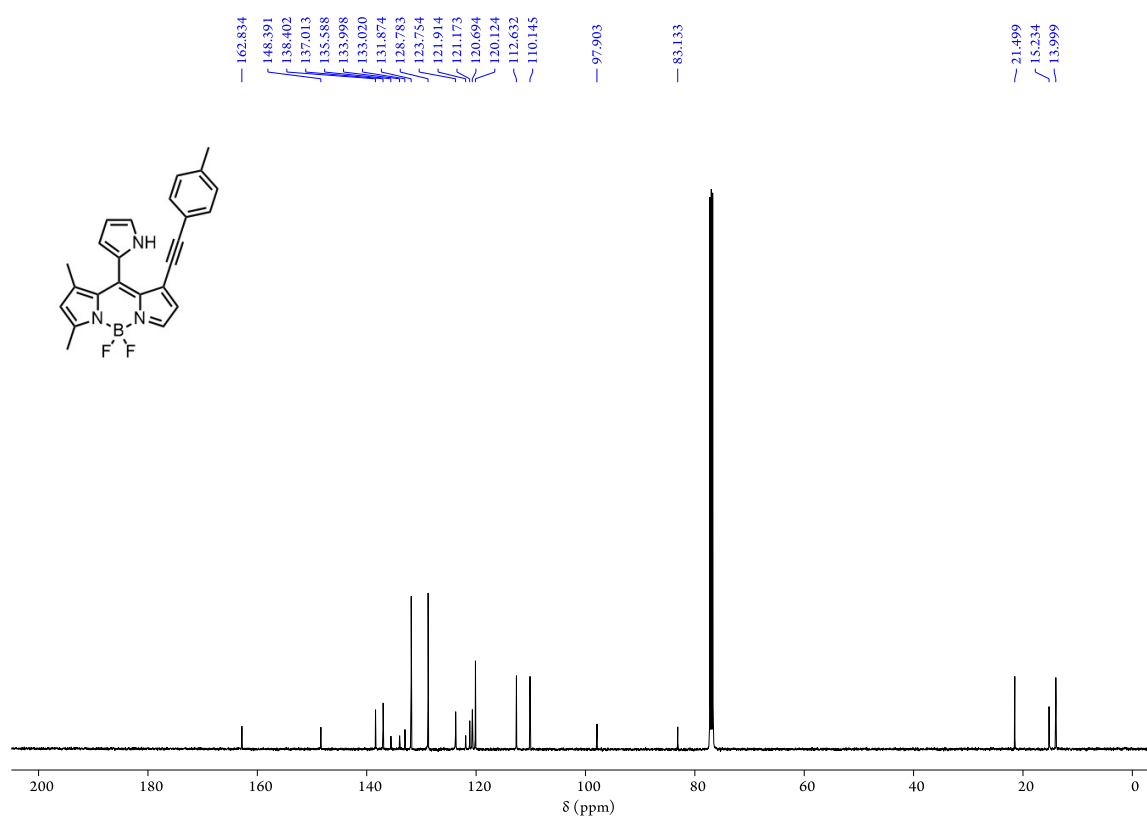

**Figure S6.** <sup>13</sup>C NMR spectrum of **3ac** in CDCl<sub>3</sub> at 298 K

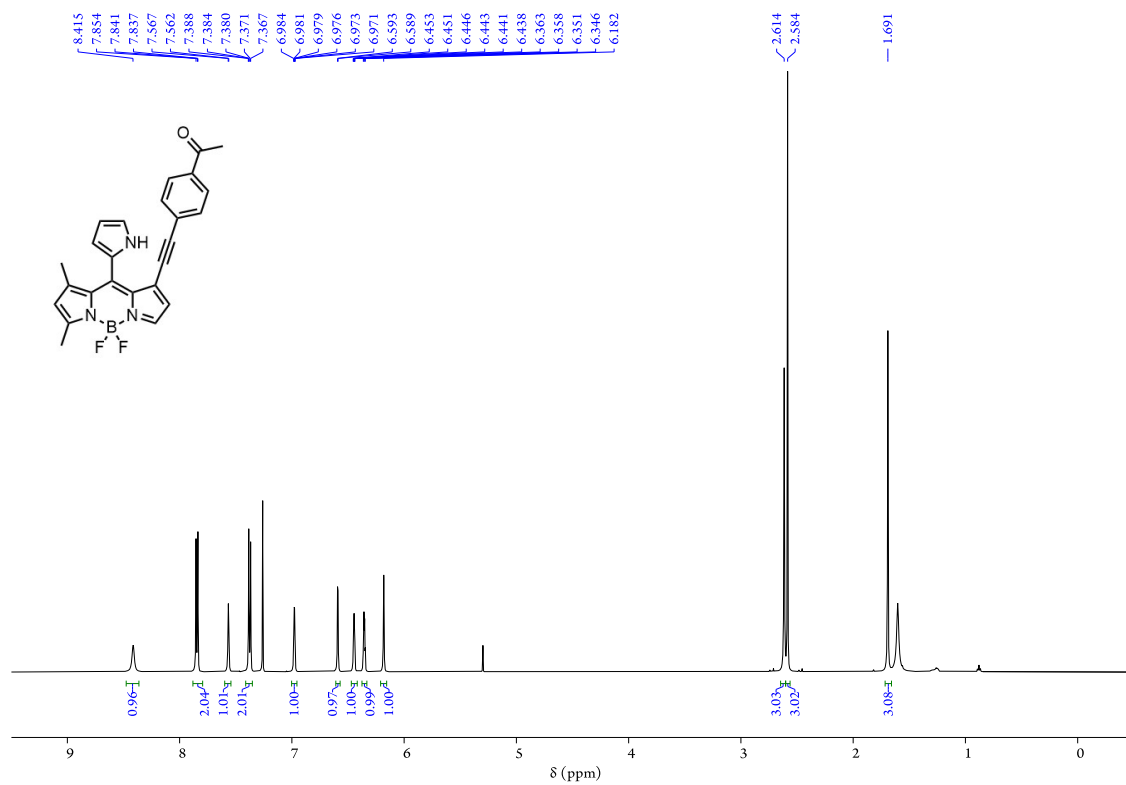

**Figure S7.  $^1\text{H}$  NMR spectrum of **3ad** in  $\text{CDCl}_3$  at 298 K**

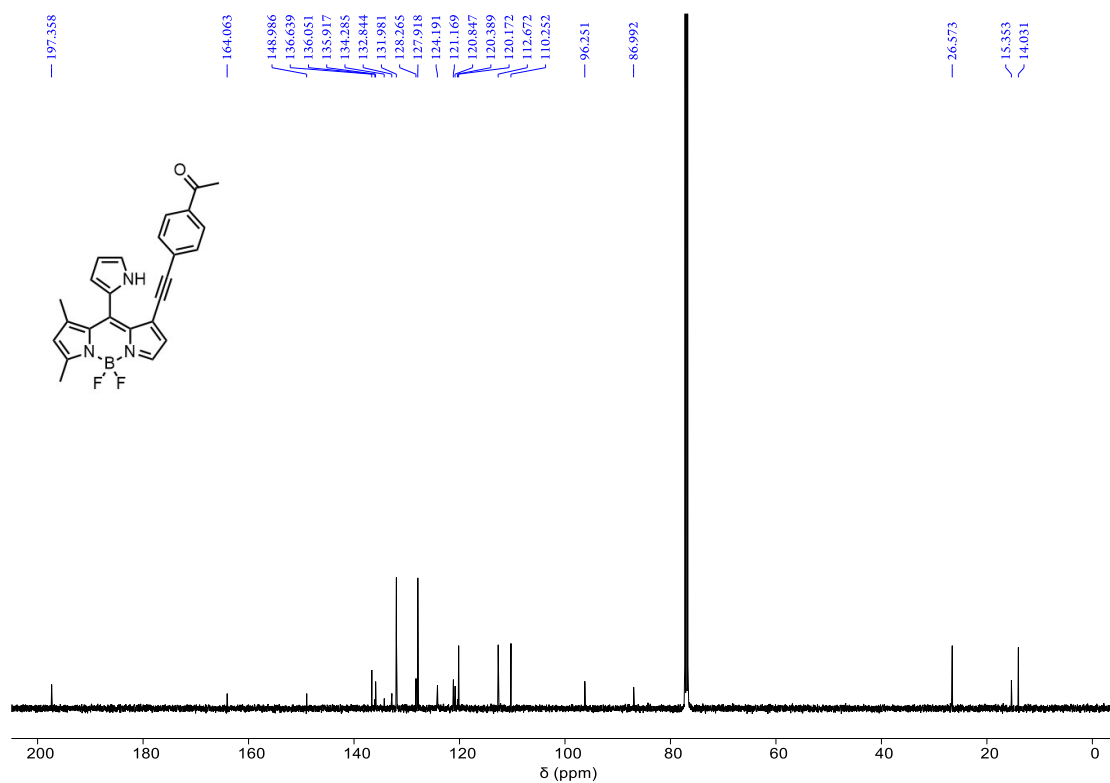

**Figure S8.  $^{13}\text{C}$  NMR spectrum of **3ad** in  $\text{CDCl}_3$  at 298 K**



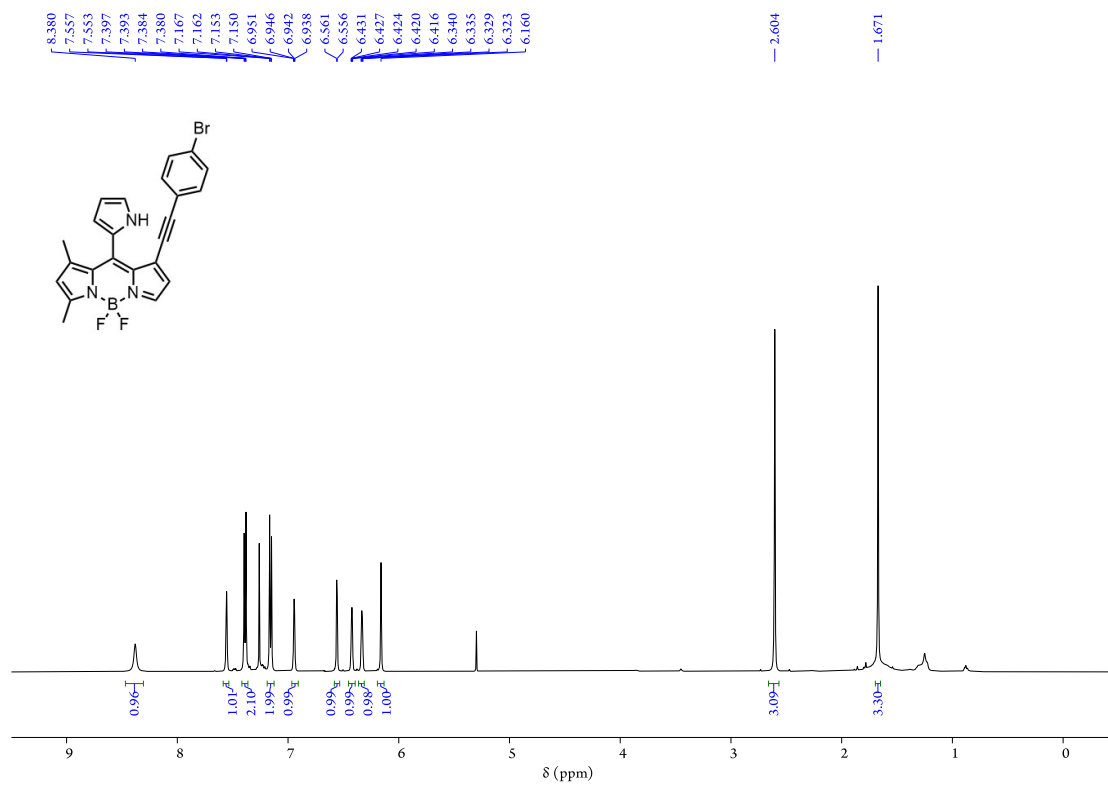

**Figure S9.**  $^1\text{H}$  NMR spectrum of **3ae** in  $\text{CDCl}_3$  at 298 K

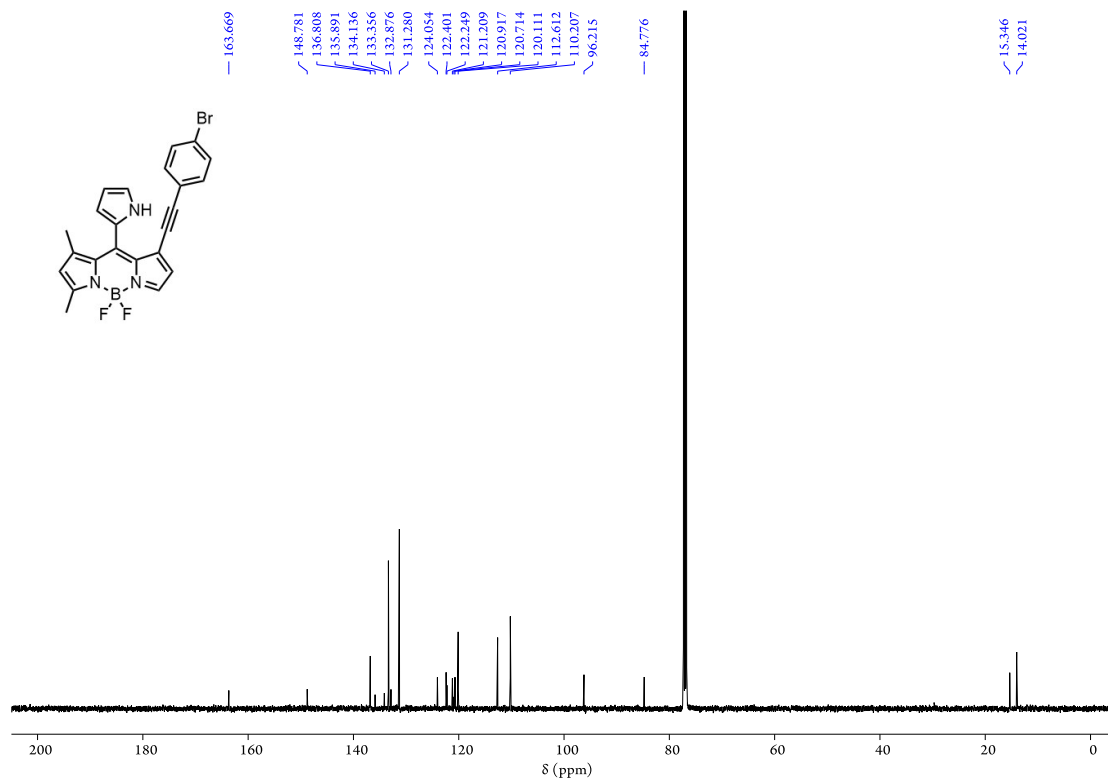

**Figure S10.**  $^{13}\text{C}$  NMR spectrum of **3ae** in  $\text{CDCl}_3$  at 298 K

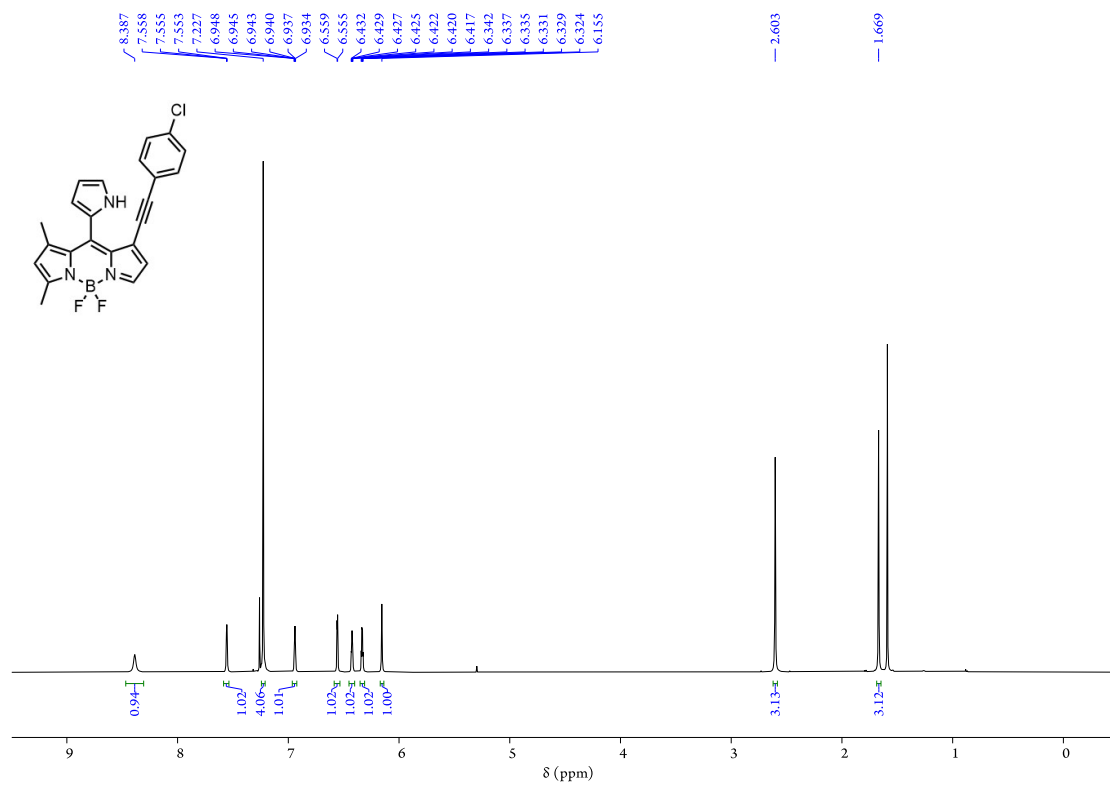

**Figure S11.**  $^1\text{H}$  NMR spectrum of **3af** in  $\text{CDCl}_3$  at 298 K

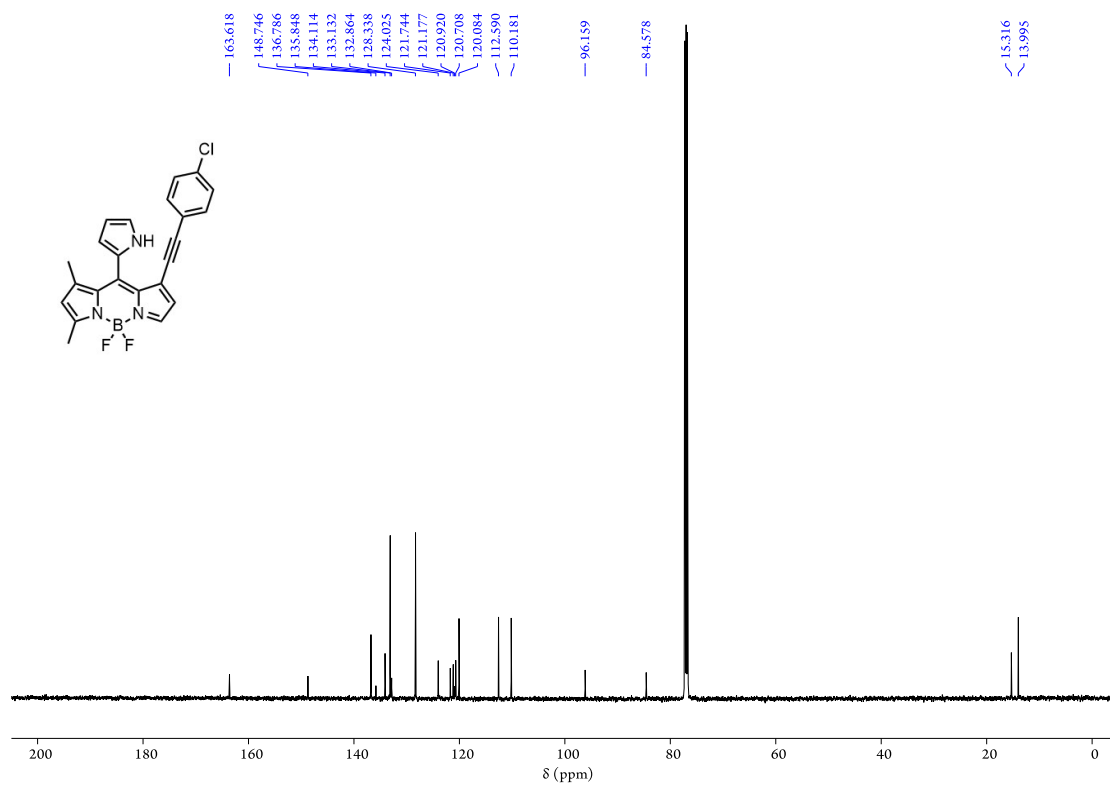

**Figure S12.**  $^{13}\text{C}$  NMR spectrum of **3af** in  $\text{CDCl}_3$  at 298 K

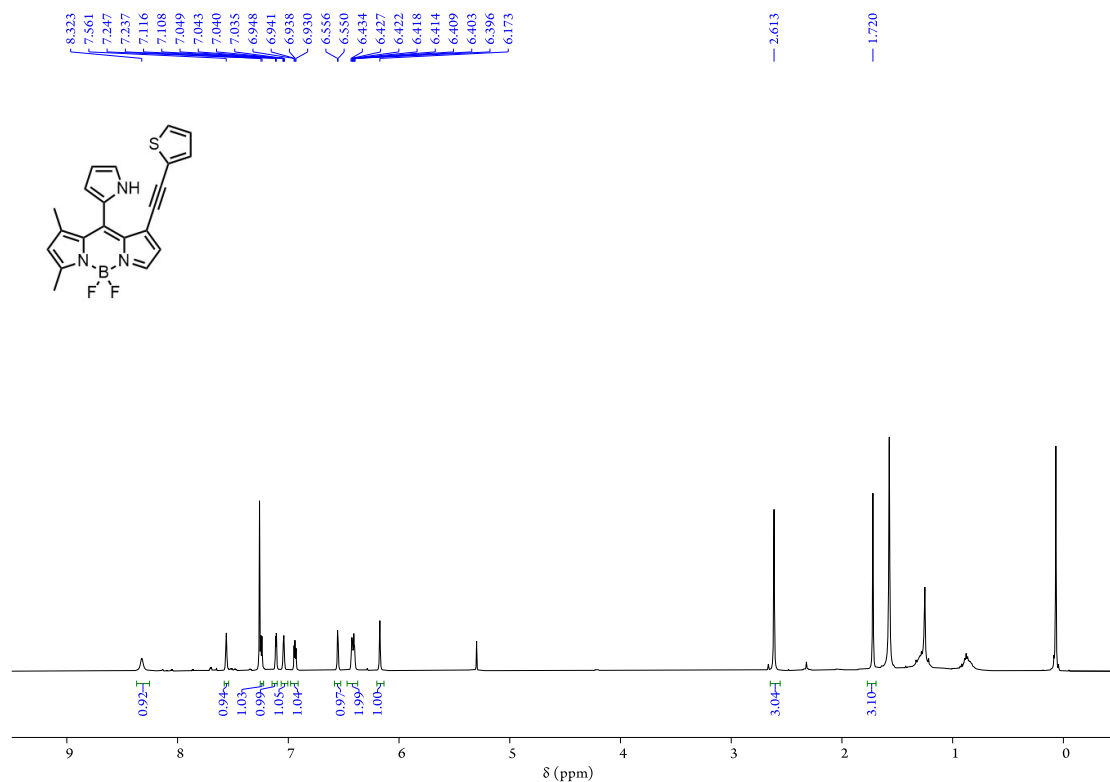

Figure S13. <sup>1</sup>H NMR spectrum of **3ag** in CDCl<sub>3</sub> at 298 K

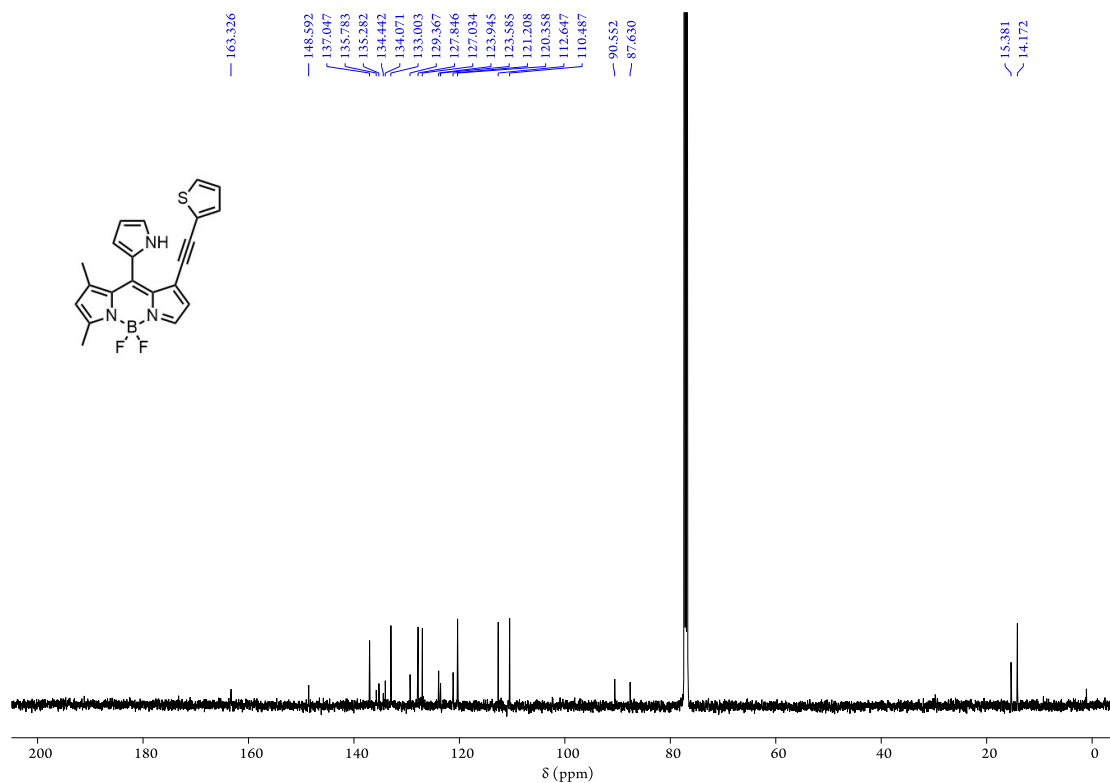

Figure S14. <sup>13</sup>C NMR spectrum of **3ag** in CDCl<sub>3</sub> at 298 K

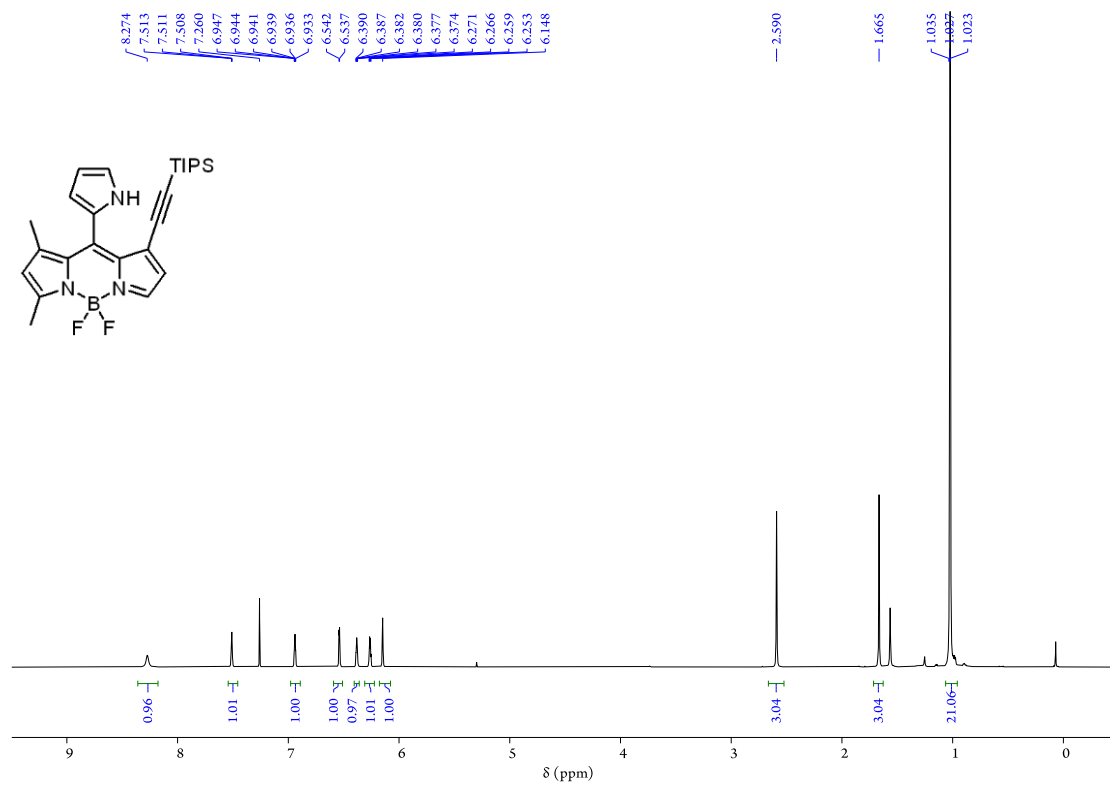

**Figure S15.** <sup>1</sup>H NMR spectrum of **3ah** in CDCl<sub>3</sub> at 298 K

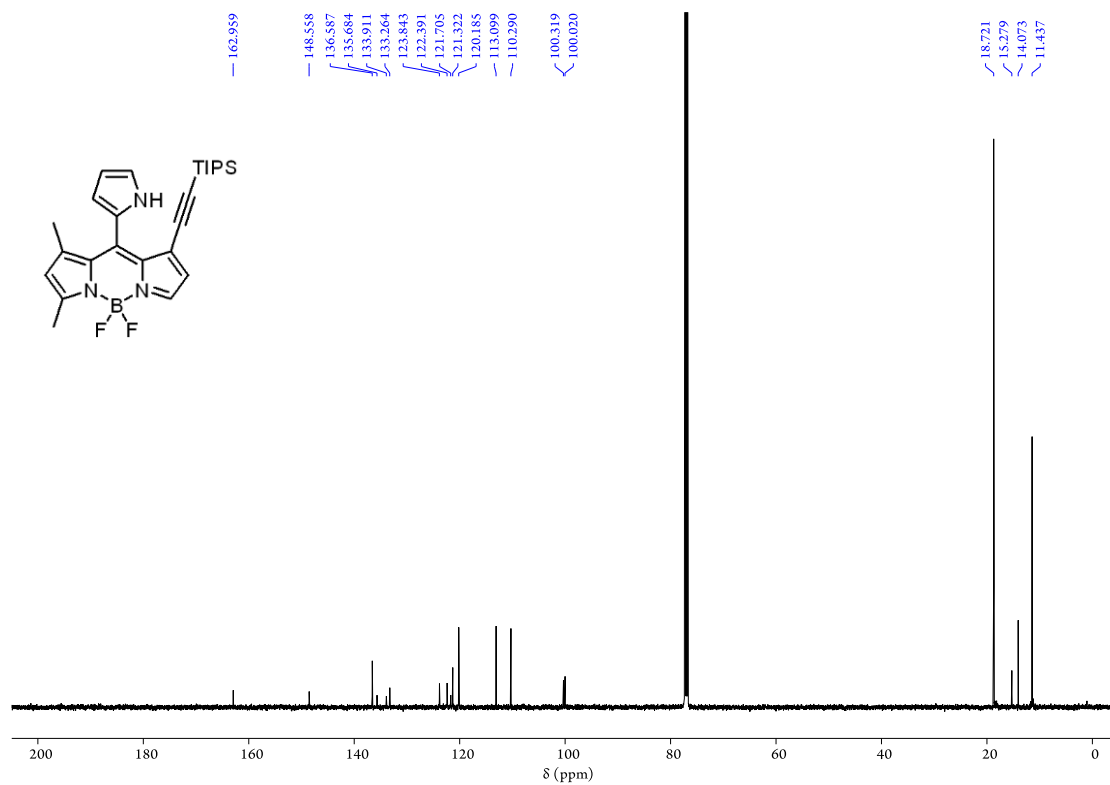

**Figure S16.** <sup>13</sup>C NMR spectrum of **3ah** in CDCl<sub>3</sub> at 298 K

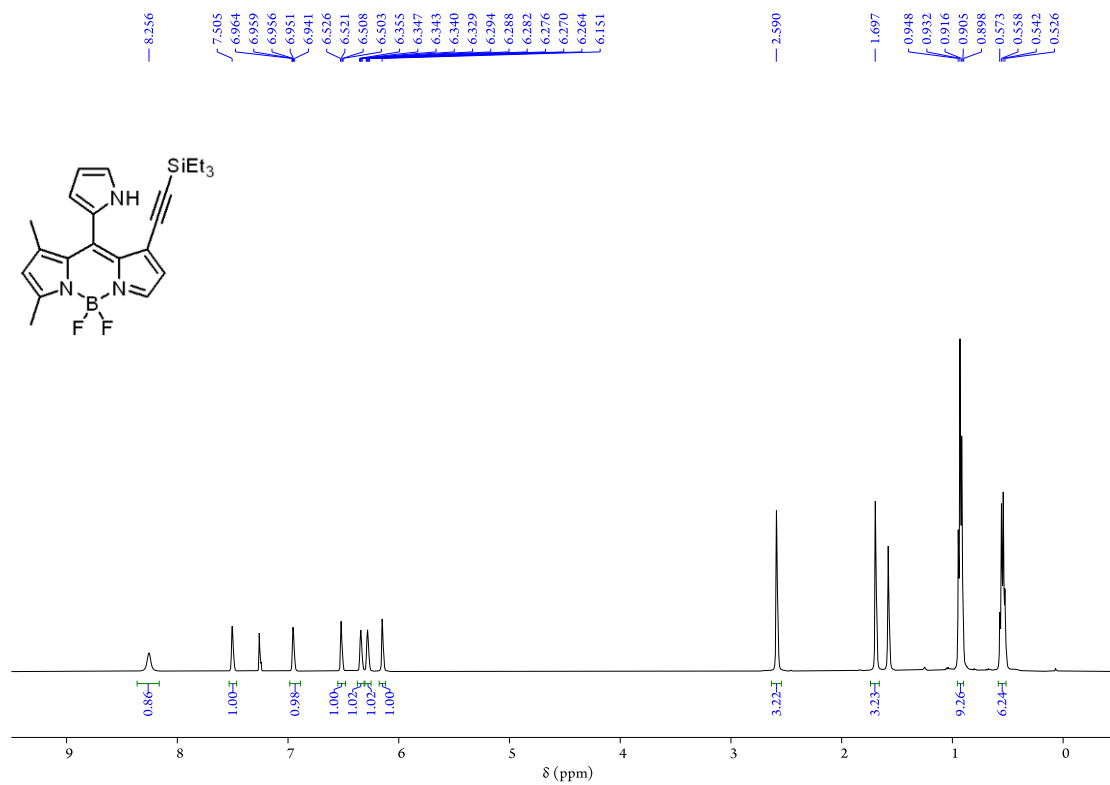

**Figure S17.** <sup>1</sup>H NMR spectrum of **3ai** in CDCl<sub>3</sub> at 298 K

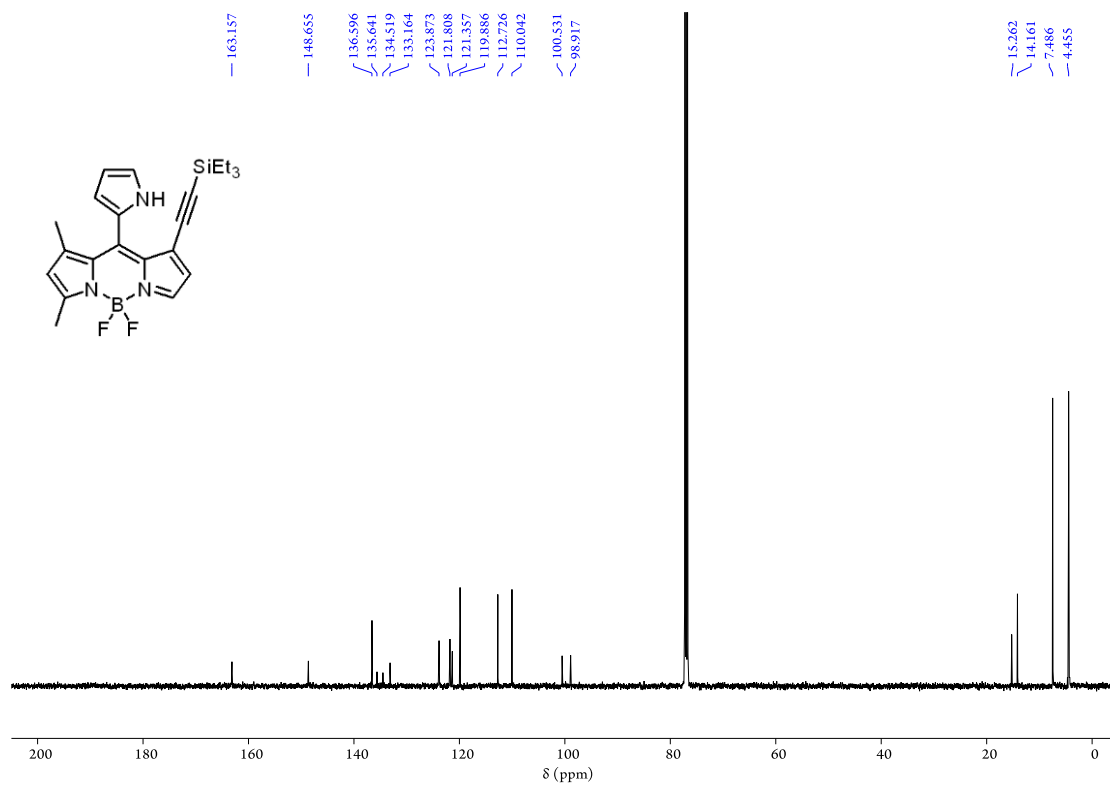

**Figure S18.** <sup>13</sup>C NMR spectrum of **3ai** in CDCl<sub>3</sub> at 298 K

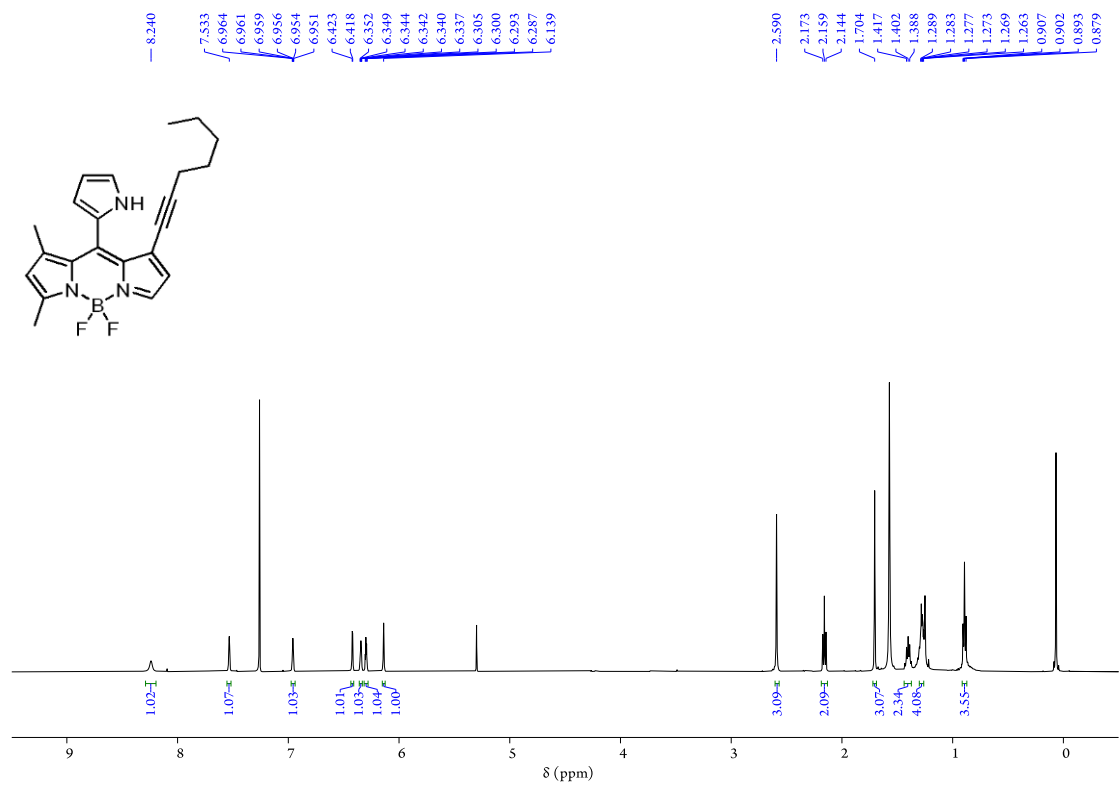

Figure S19. <sup>1</sup>H NMR spectrum of **3aj** in CDCl<sub>3</sub> at 298 K

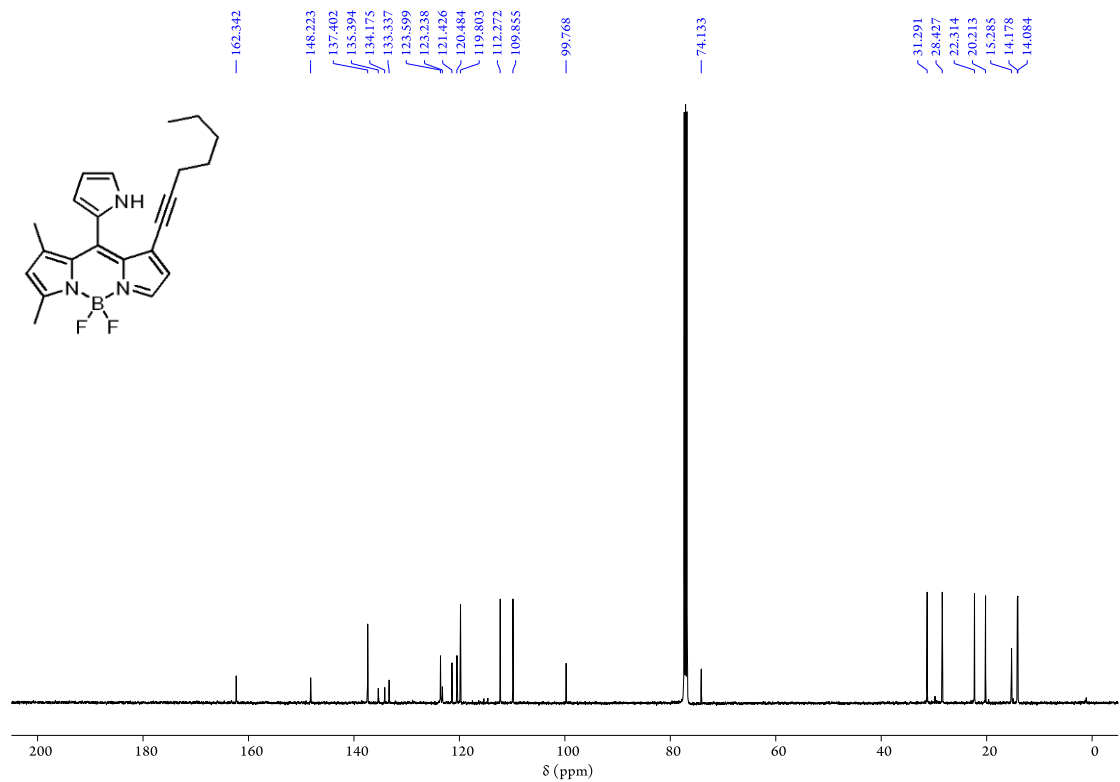

Figure S20. <sup>13</sup>C NMR spectrum of **3aj** in CDCl<sub>3</sub> at 298 K

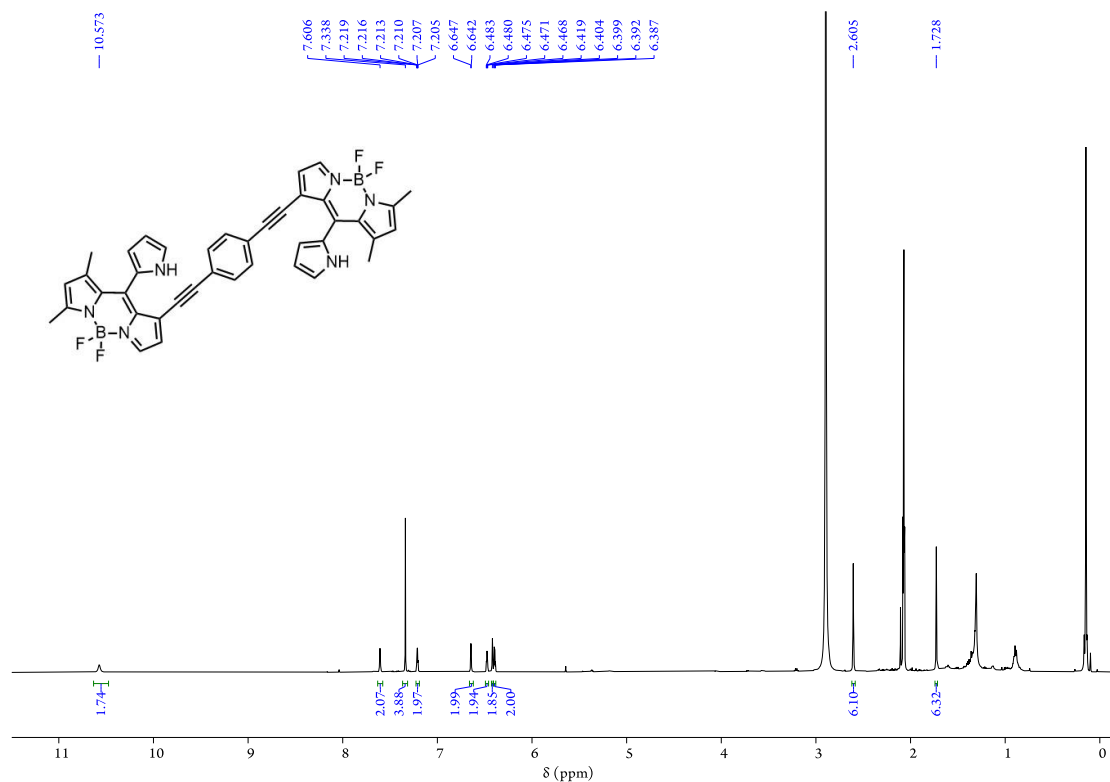

Figure S21. <sup>1</sup>H NMR spectrum of **3ak** in acetone-*d*<sub>6</sub> at 298 K

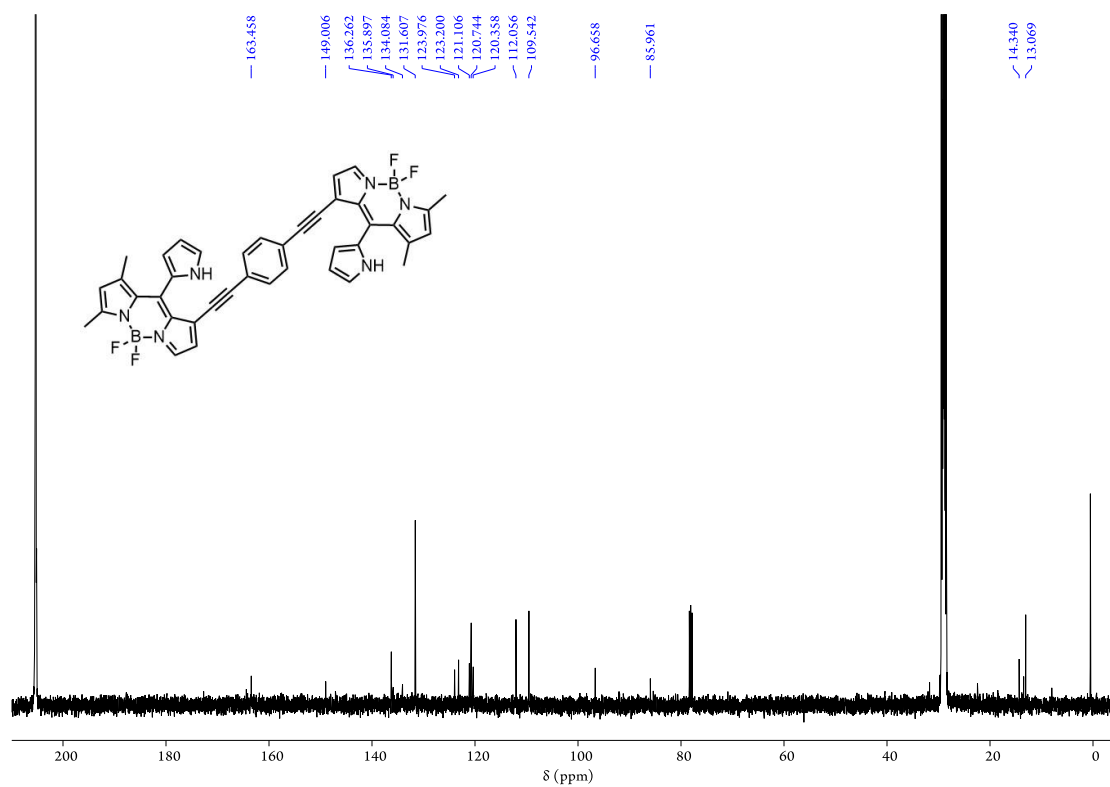

Figure S22. <sup>13</sup>C NMR spectrum of **3ak** in acetone-*d*<sub>6</sub> at 298 K

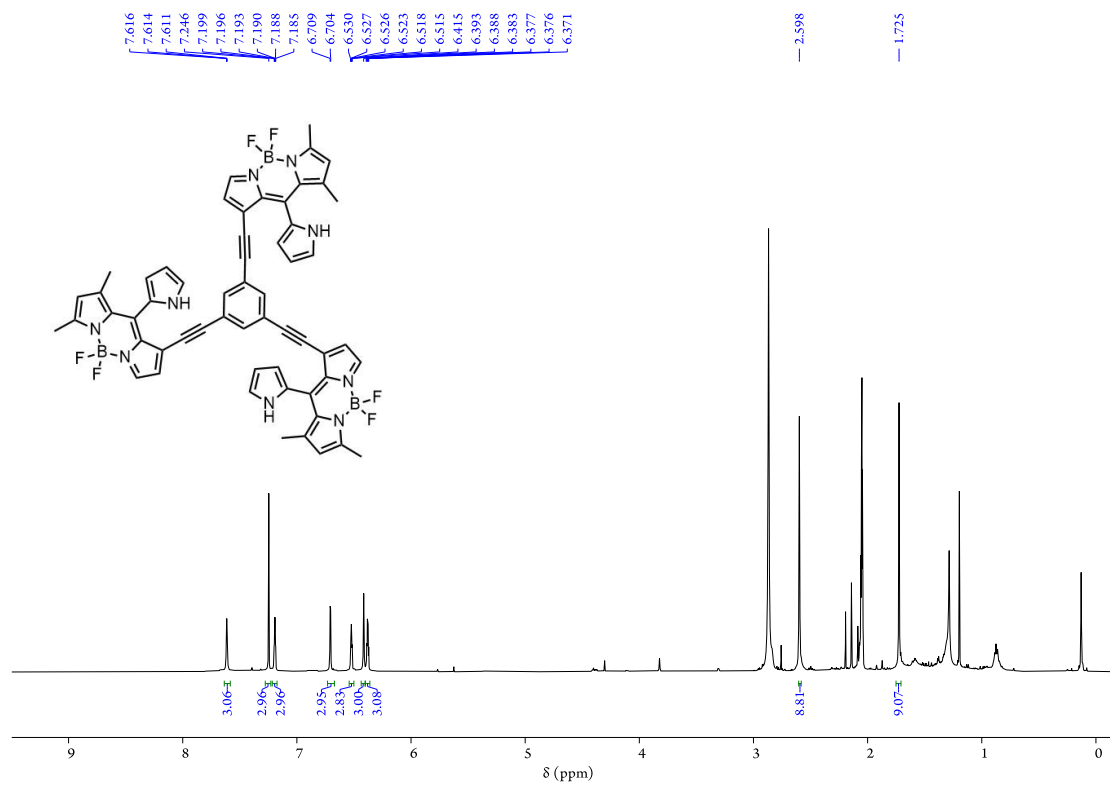

**Figure S23.** <sup>1</sup>H NMR spectrum of **3al** in acetone-*d*<sub>6</sub> at 298 K

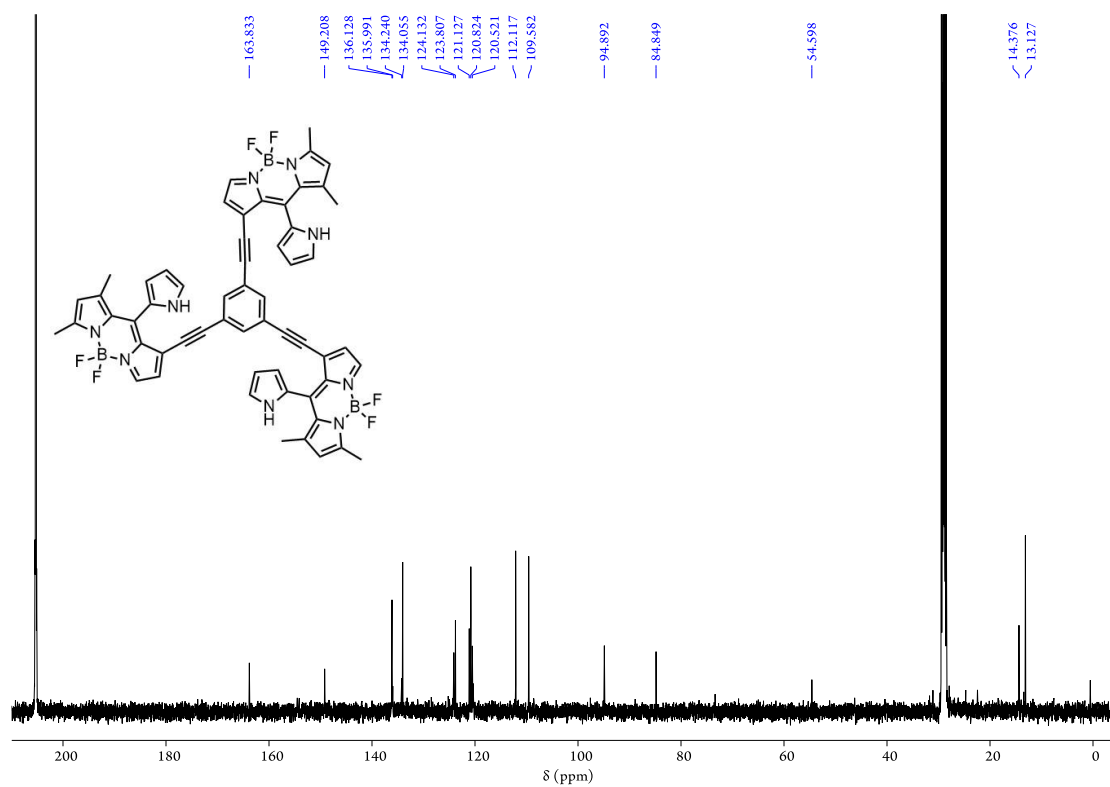

**Figure S24.** <sup>13</sup>C NMR spectrum of **3al** in acetone-*d*<sub>6</sub> at 298 K



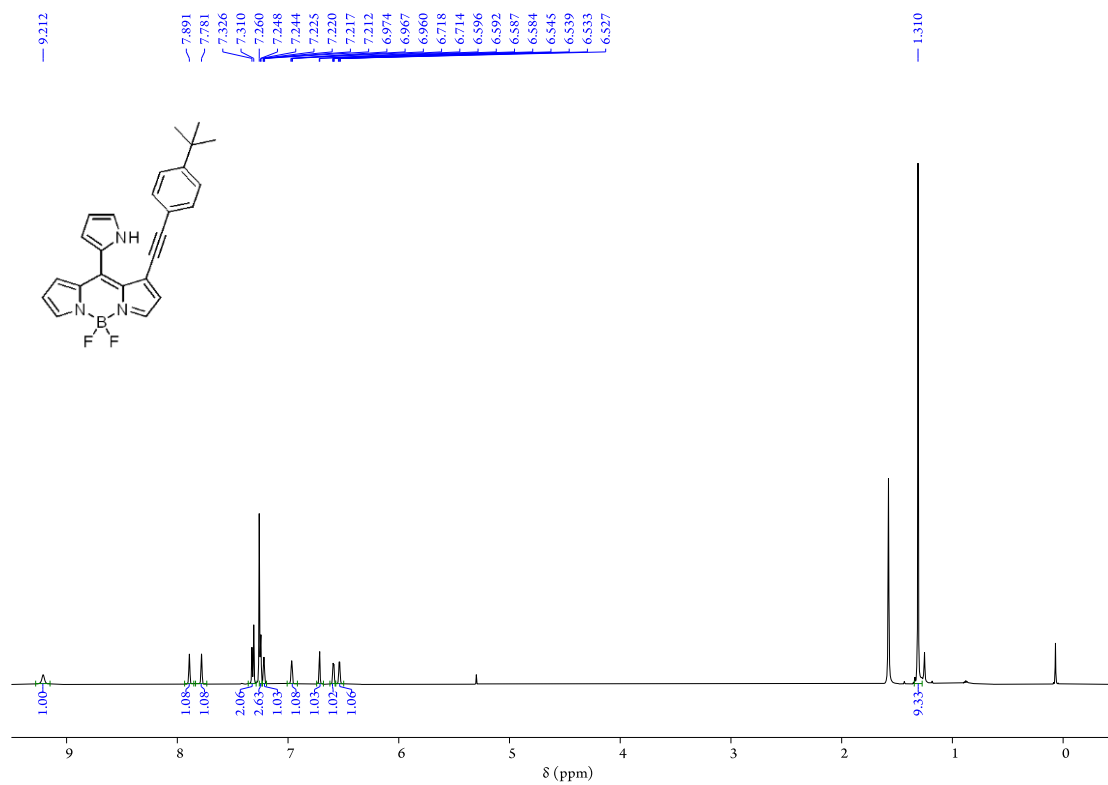

Figure S25. <sup>1</sup>H NMR spectrum of **3ba** in CDCl<sub>3</sub> at 298 K

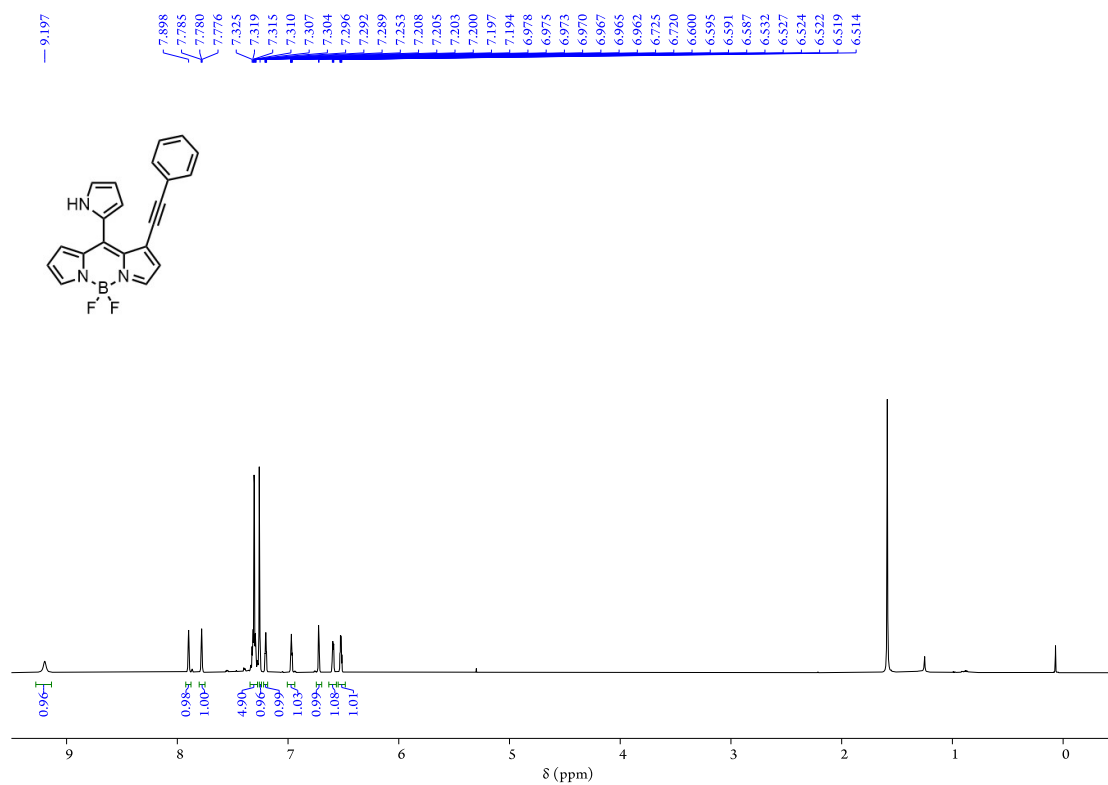

Figure S26. <sup>1</sup>H NMR spectrum of **3bb** in CDCl<sub>3</sub> at 298 K

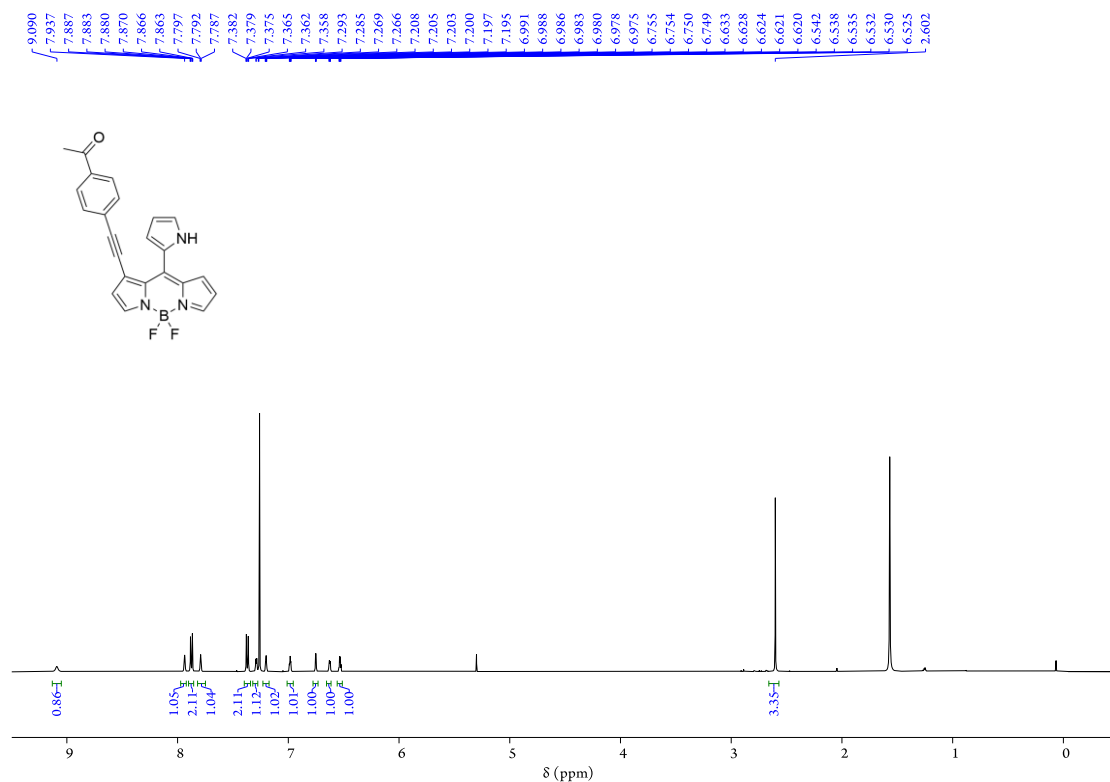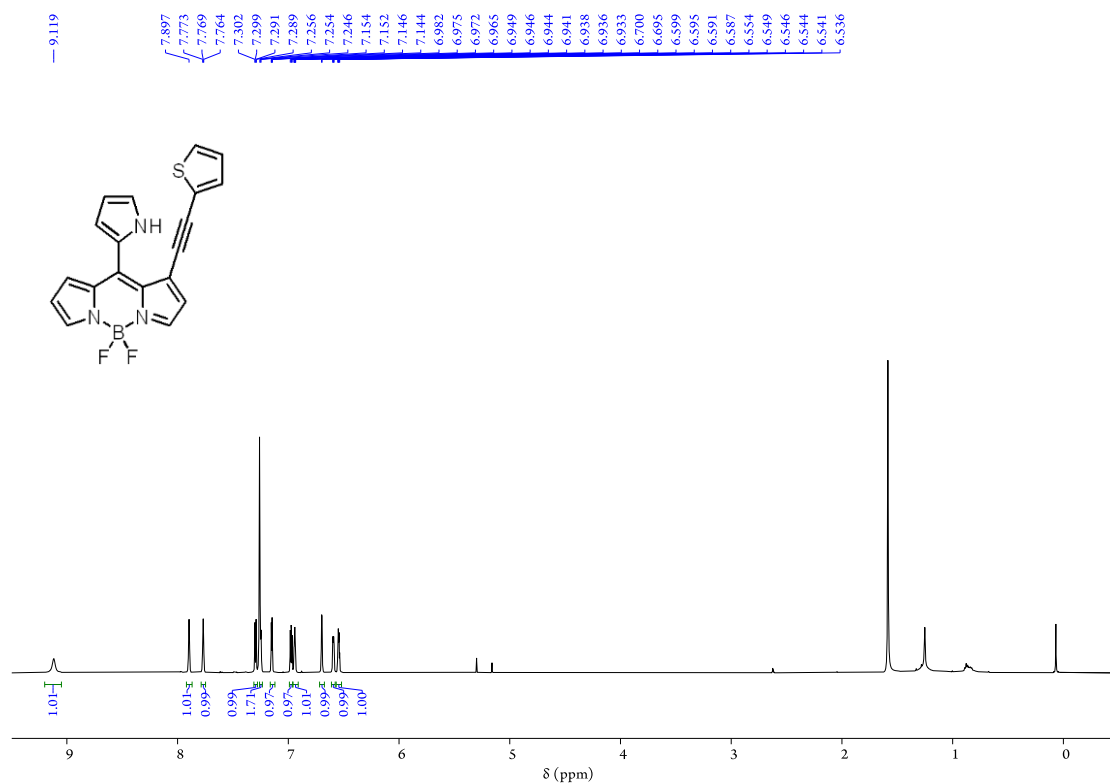

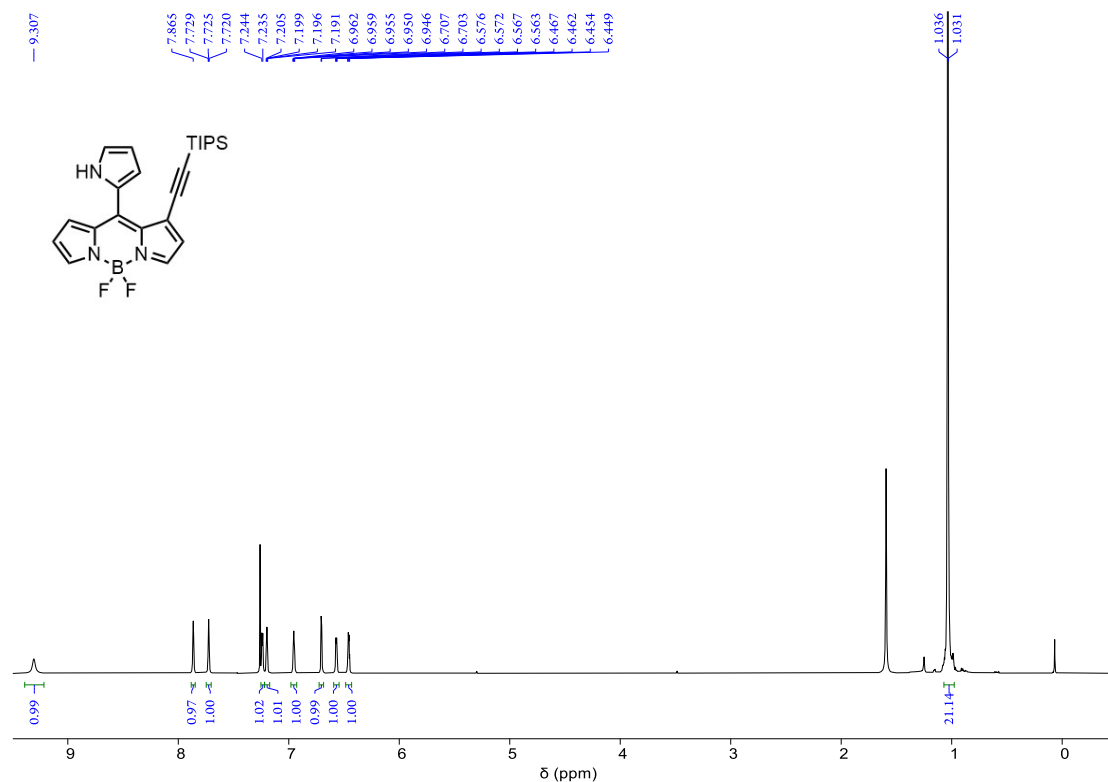

**Figure S29.** <sup>1</sup>H NMR spectrum of **3bh** in CDCl<sub>3</sub> at 298 K

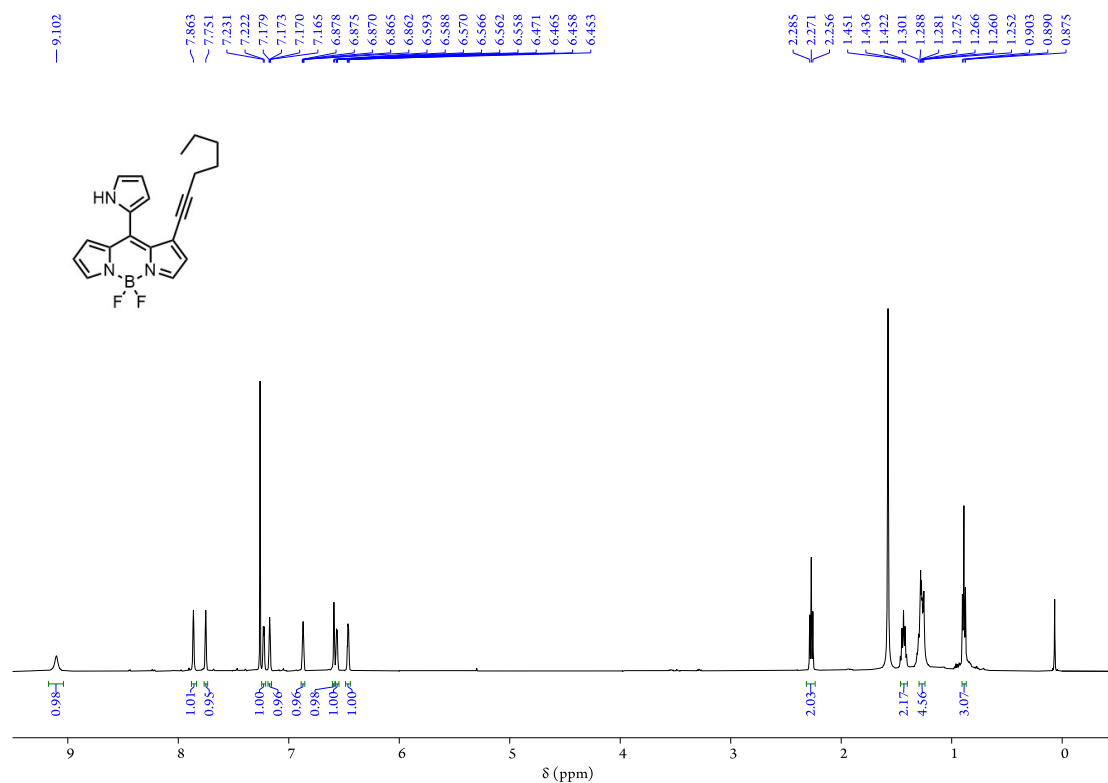

**Figure S30** <sup>1</sup>H NMR spectrum of **3bj** in CDCl<sub>3</sub> at 298 K

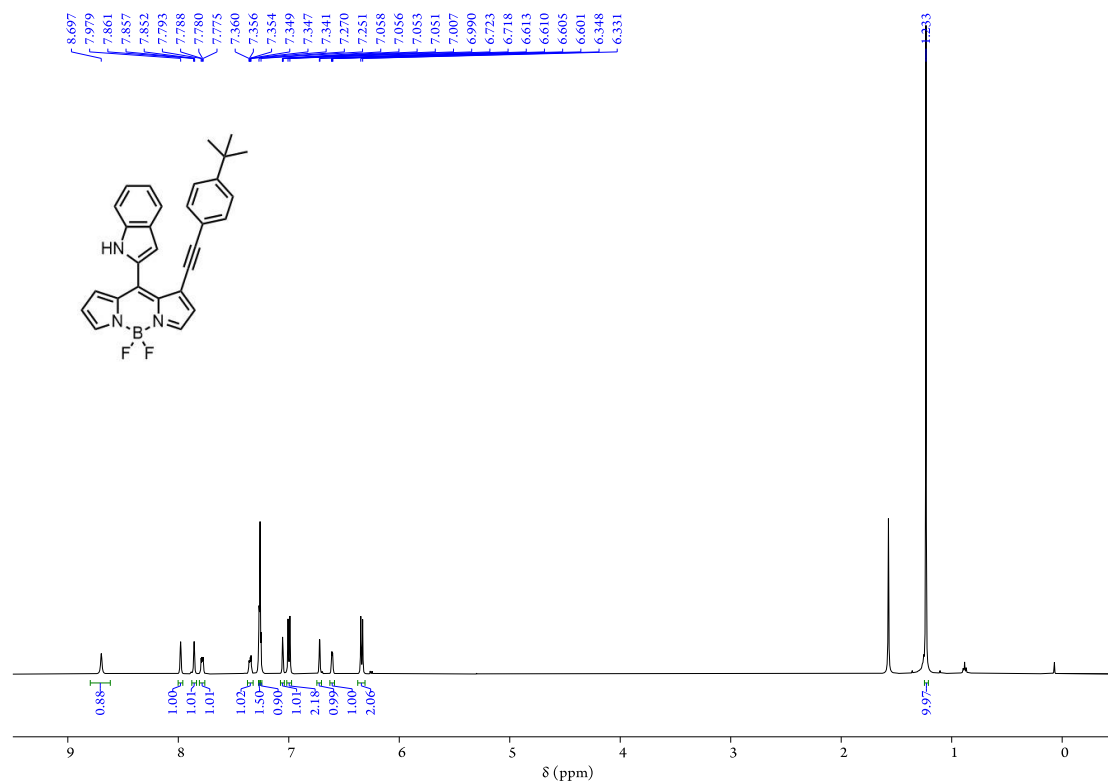

**Figure S31** <sup>1</sup>H NMR spectrum of **3ca** in CDCl<sub>3</sub> at 298 K

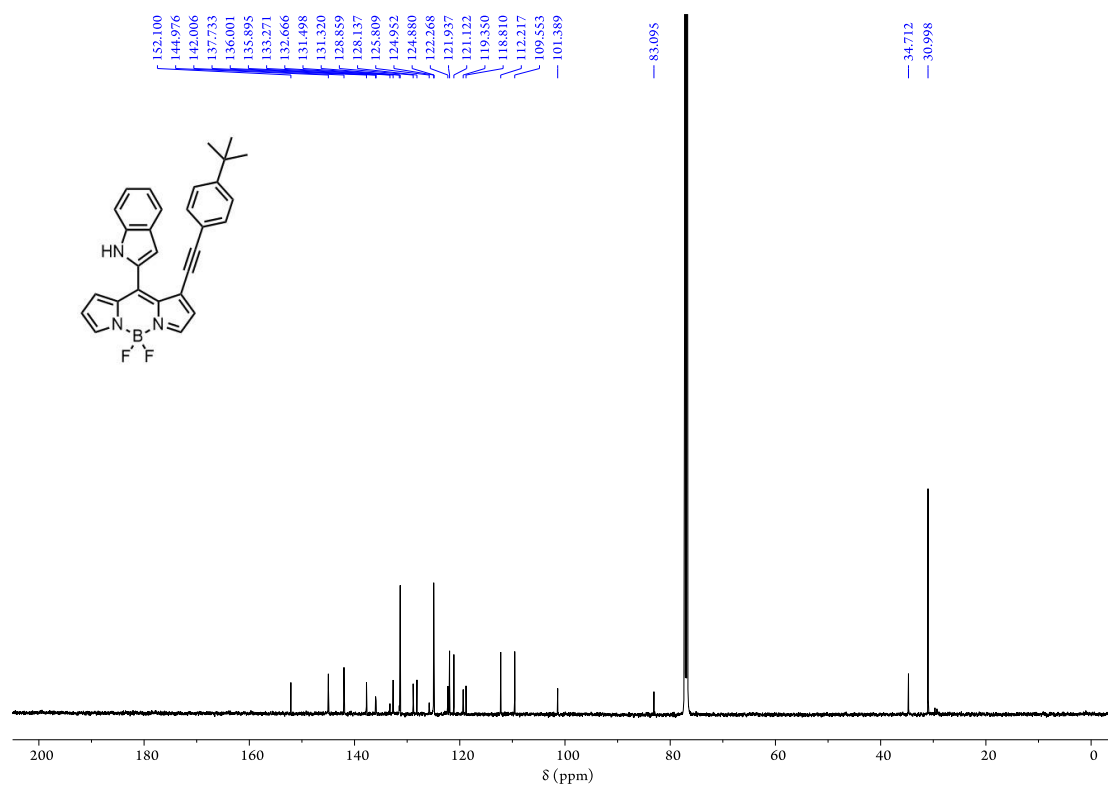

**Figure S32** <sup>13</sup>C NMR spectrum of **3ca** in CDCl<sub>3</sub> at 298 K

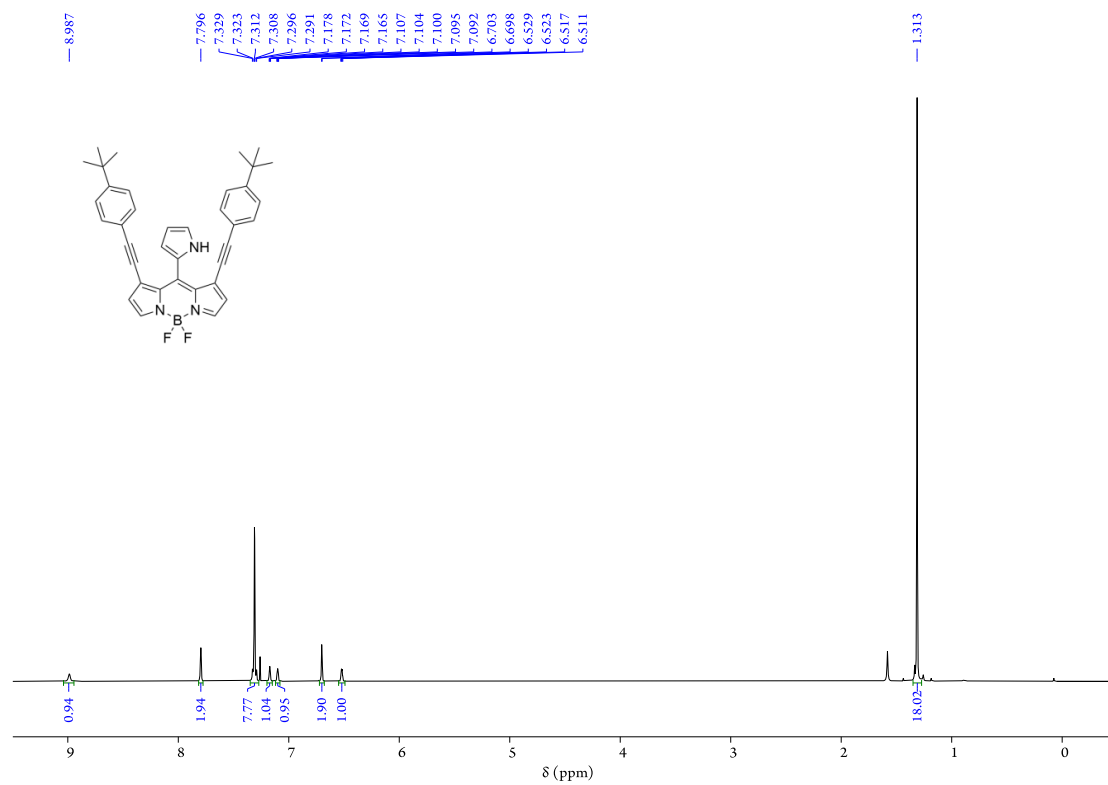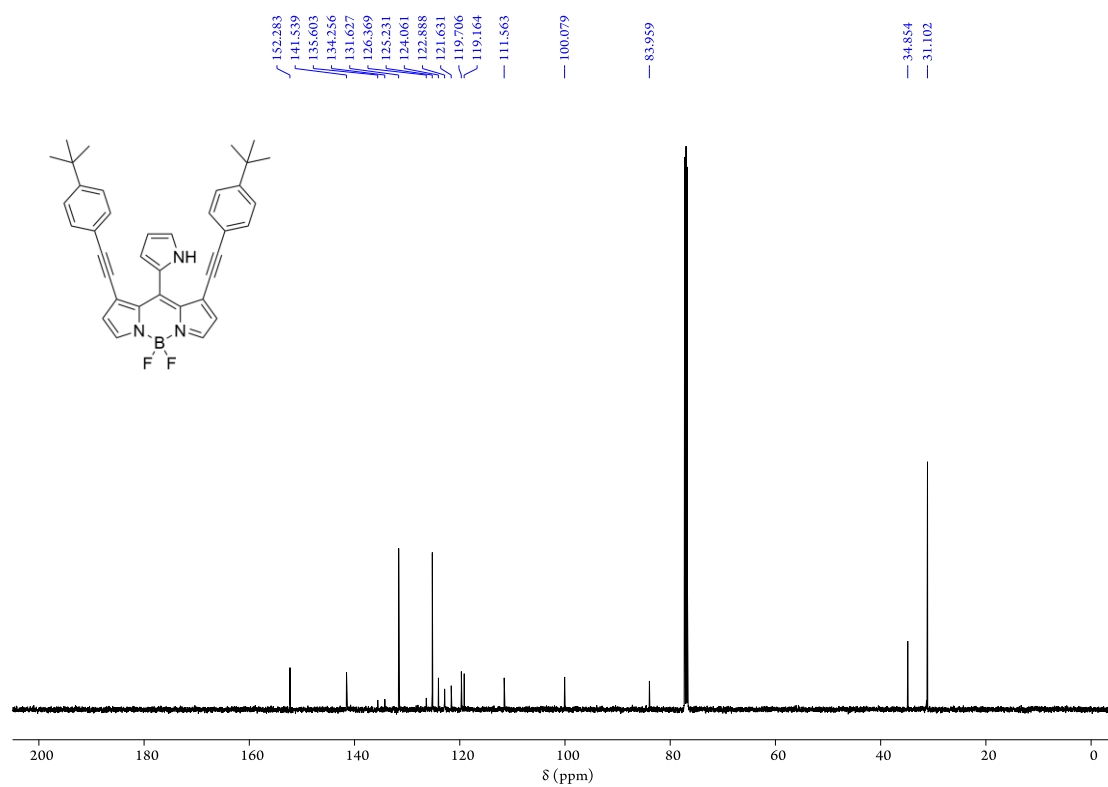

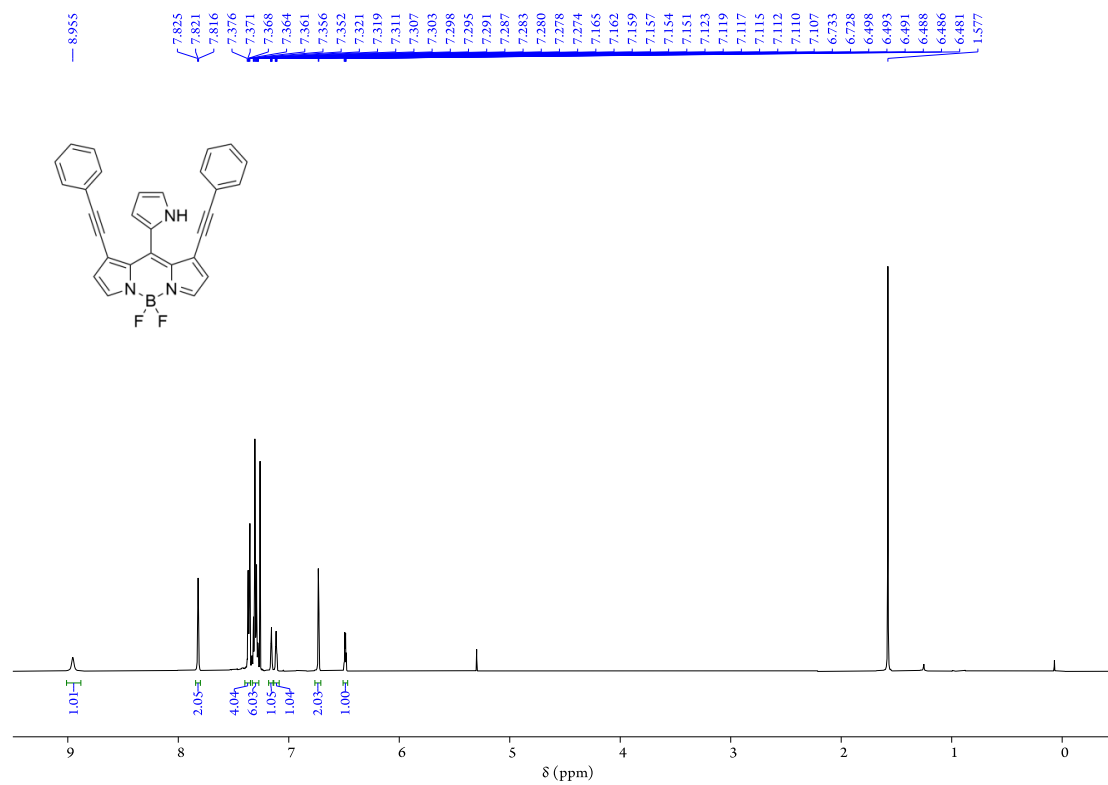

**Figure S35.** <sup>1</sup>H NMR spectrum of **4bb** in CDCl<sub>3</sub> at 298 K

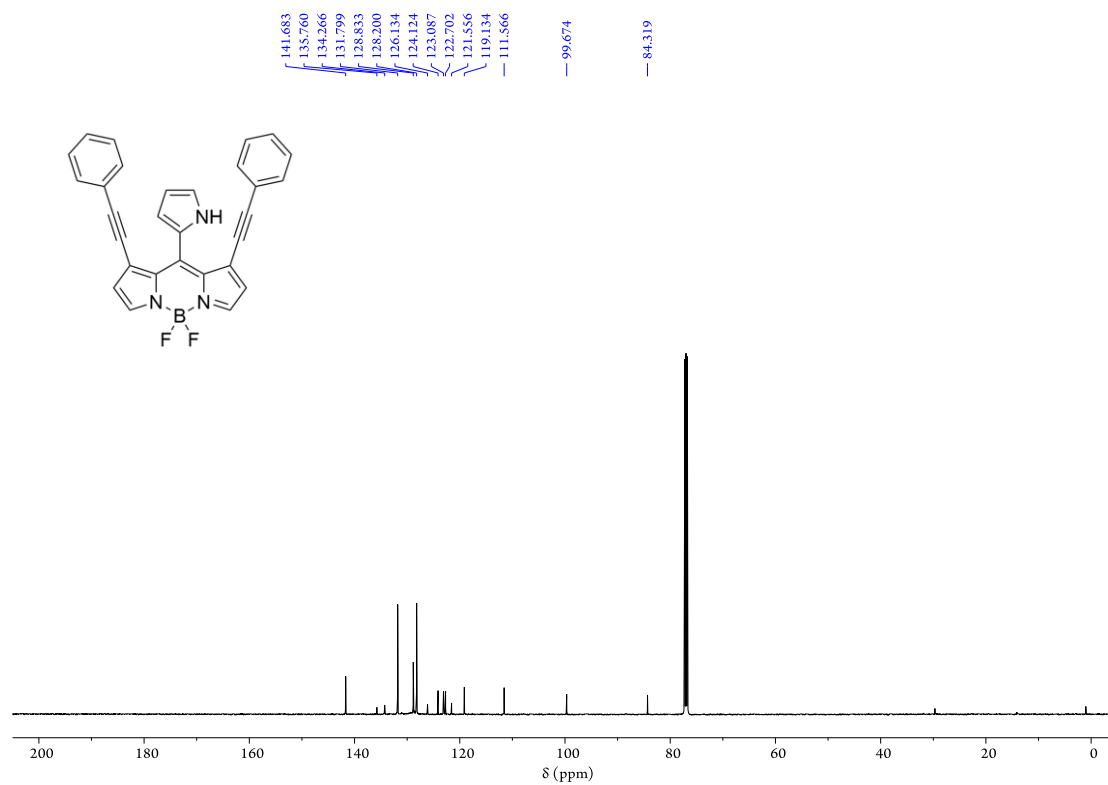

**Figure S36.** <sup>13</sup>C NMR spectrum of **4bb** in CDCl<sub>3</sub> at 298 K

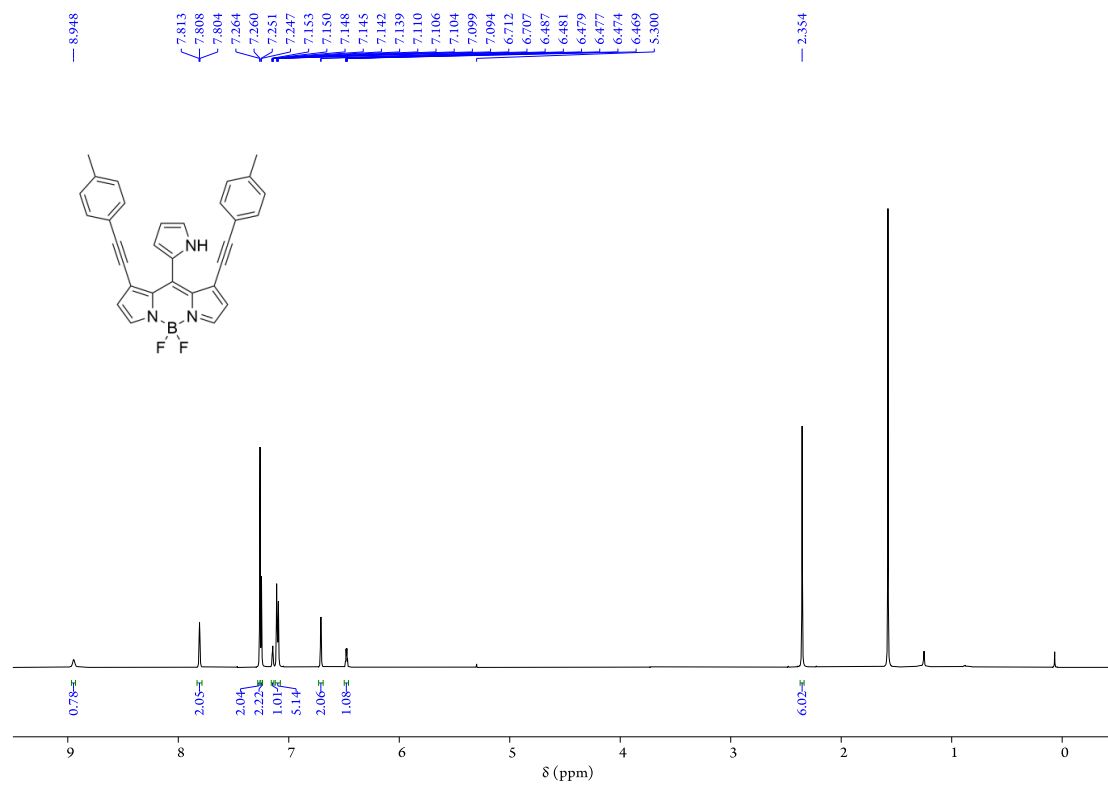

Figure S37. <sup>1</sup>H NMR spectrum of **4bc** in CDCl<sub>3</sub> at 298 K

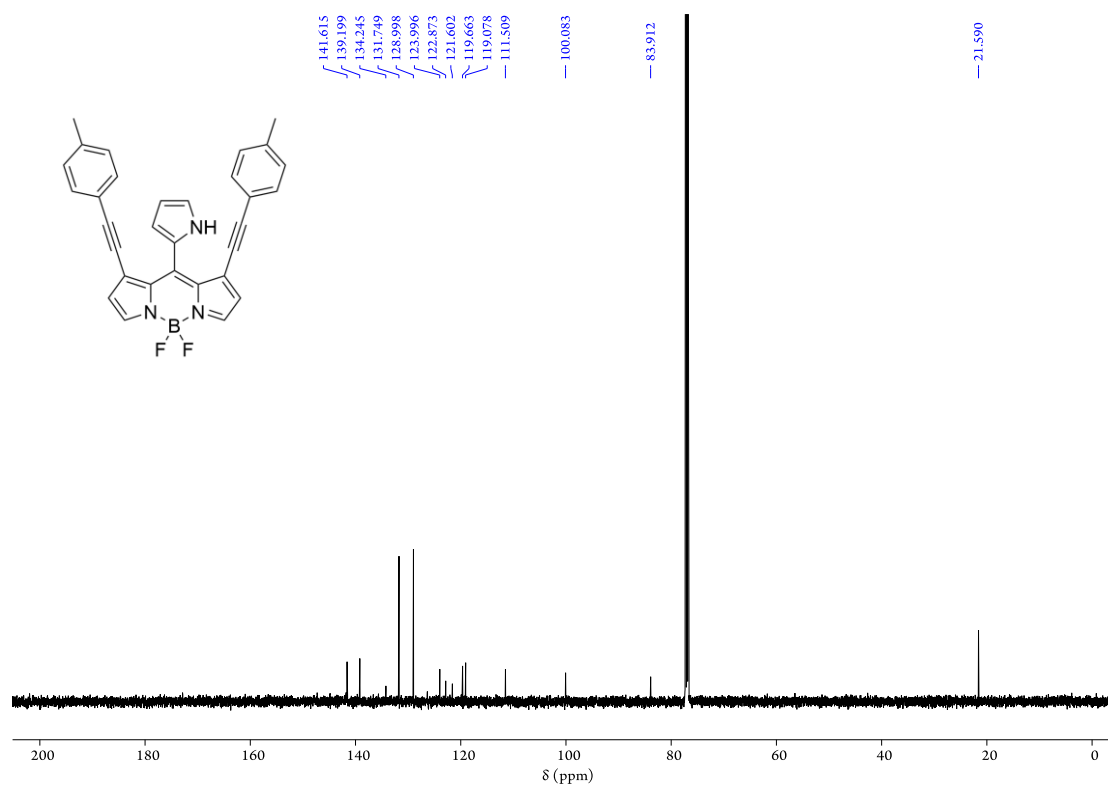

Figure S38. <sup>13</sup>C NMR spectrum of **4bc** in CDCl<sub>3</sub> at 298 K

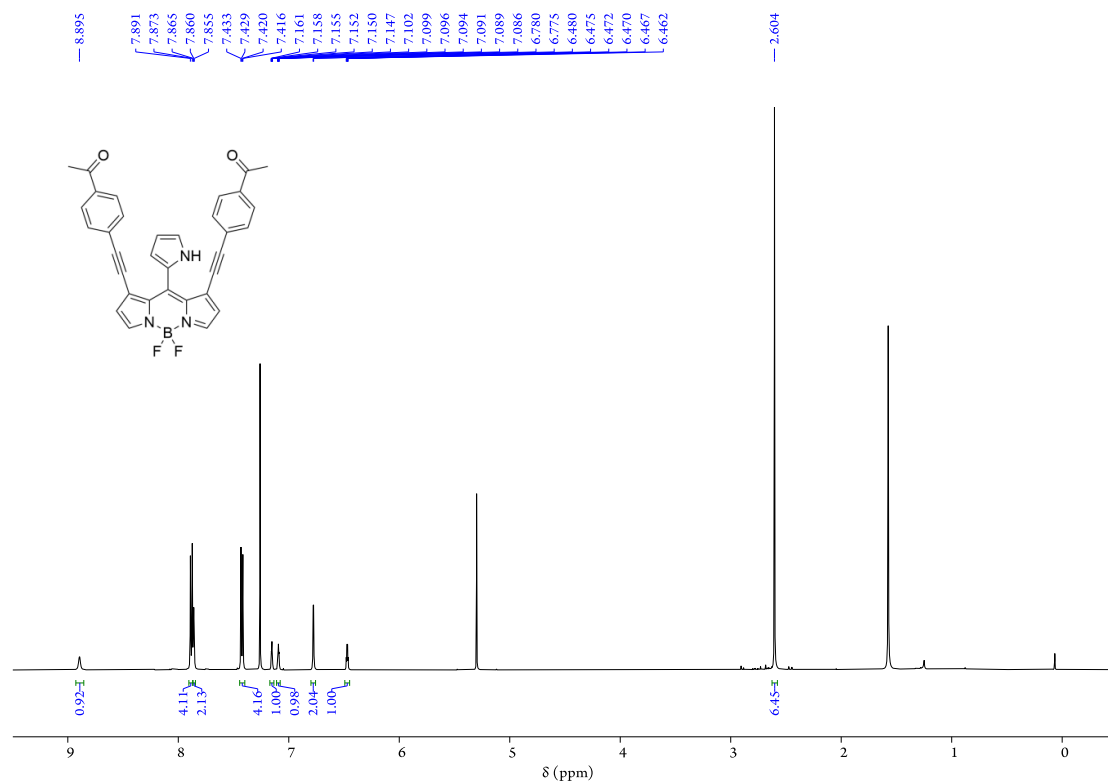

**Figure S39.**  $^1\text{H}$  NMR spectrum of **4bd** in  $\text{CDCl}_3$  at 298 K

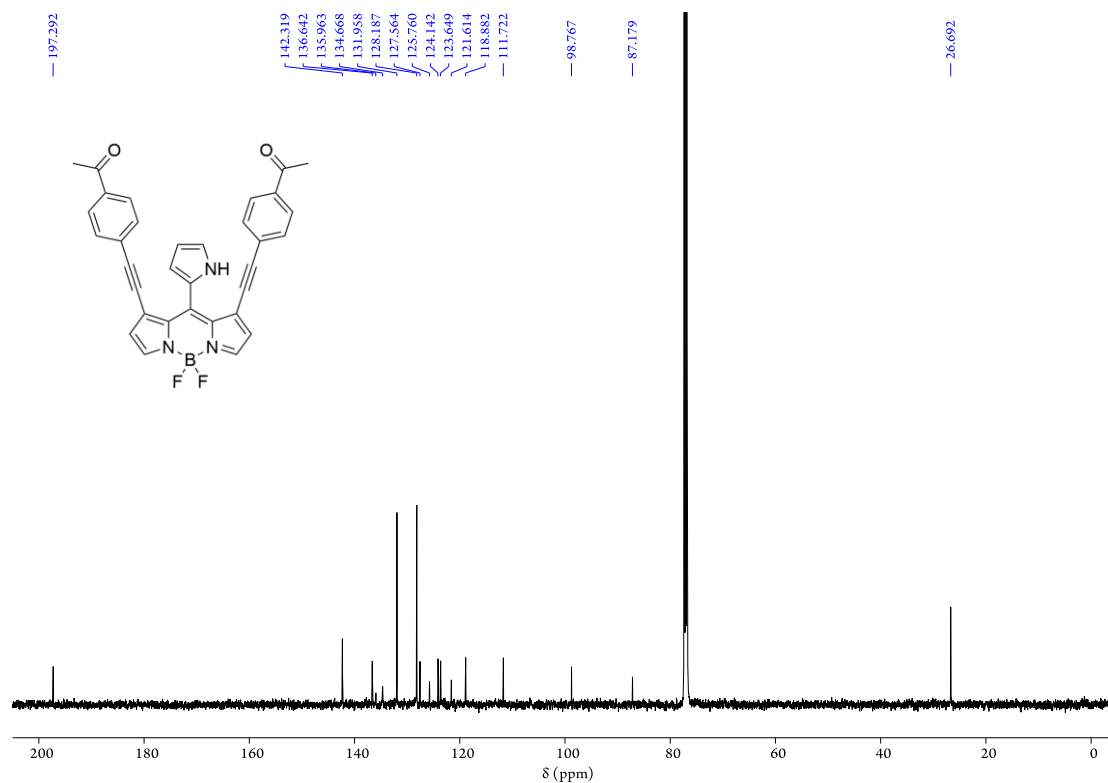

**Figure S40.**  $^{13}\text{C}$  NMR spectrum of **4bd** in  $\text{CDCl}_3$  at 298 K



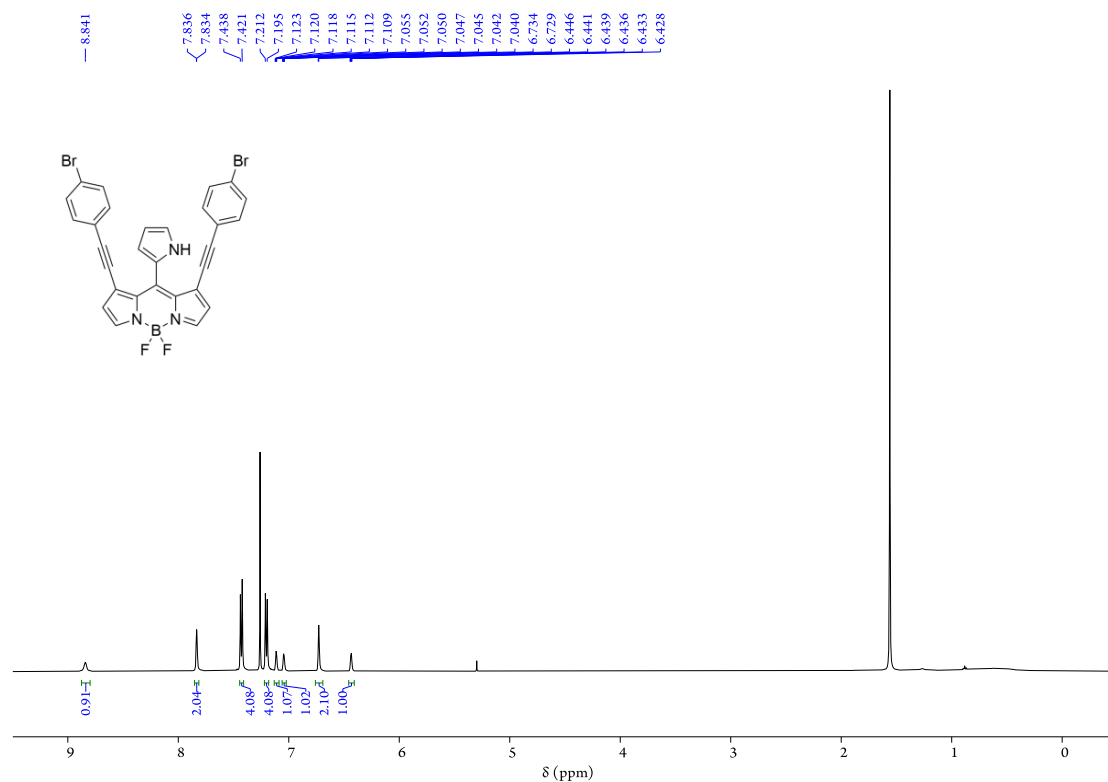

Figure S41. <sup>1</sup>H NMR spectrum of **4be** in CDCl<sub>3</sub> at 298 K

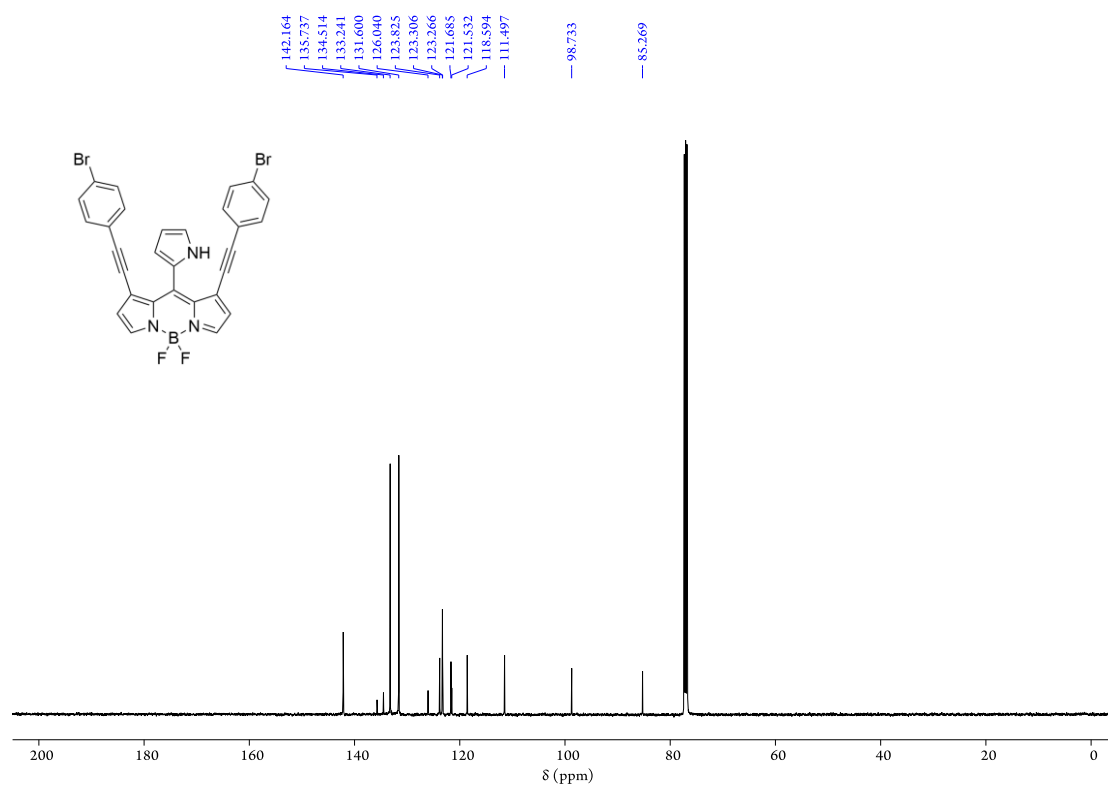

Figure S42. <sup>13</sup>C NMR spectrum of **4be** in CDCl<sub>3</sub> at 298 K

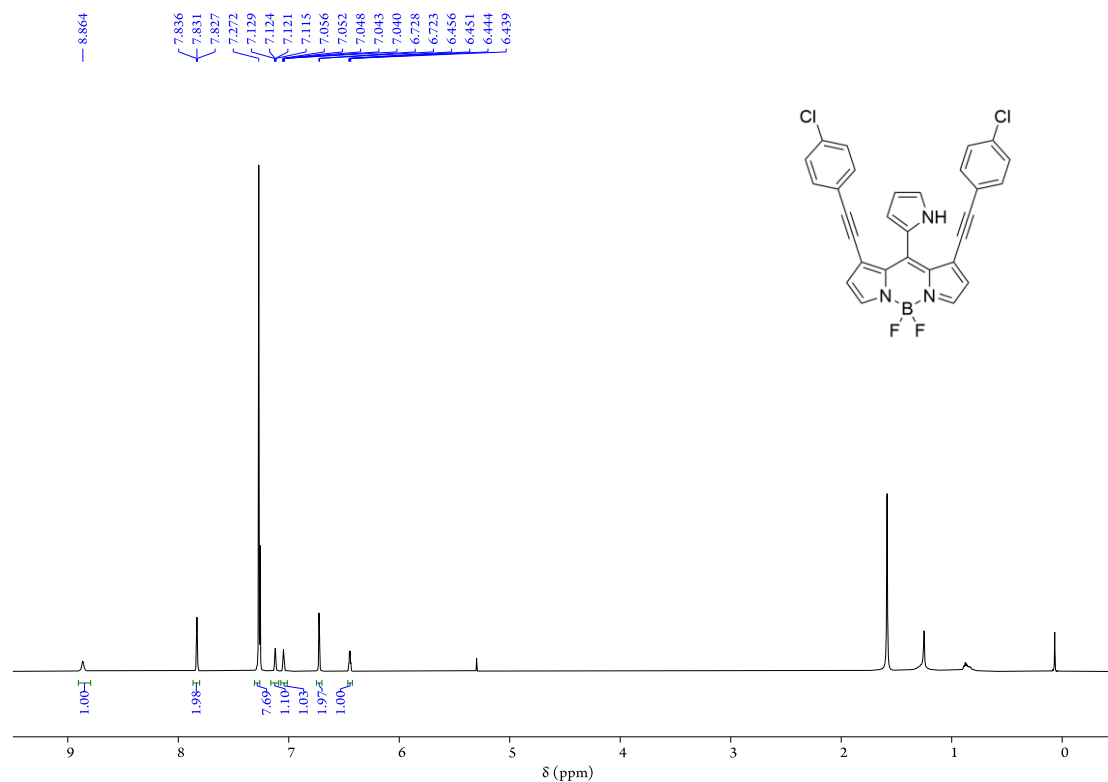

Figure S43.  $^1\text{H NMR}$  spectrum of **4bf** in  $\text{CDCl}_3$  at 298 K

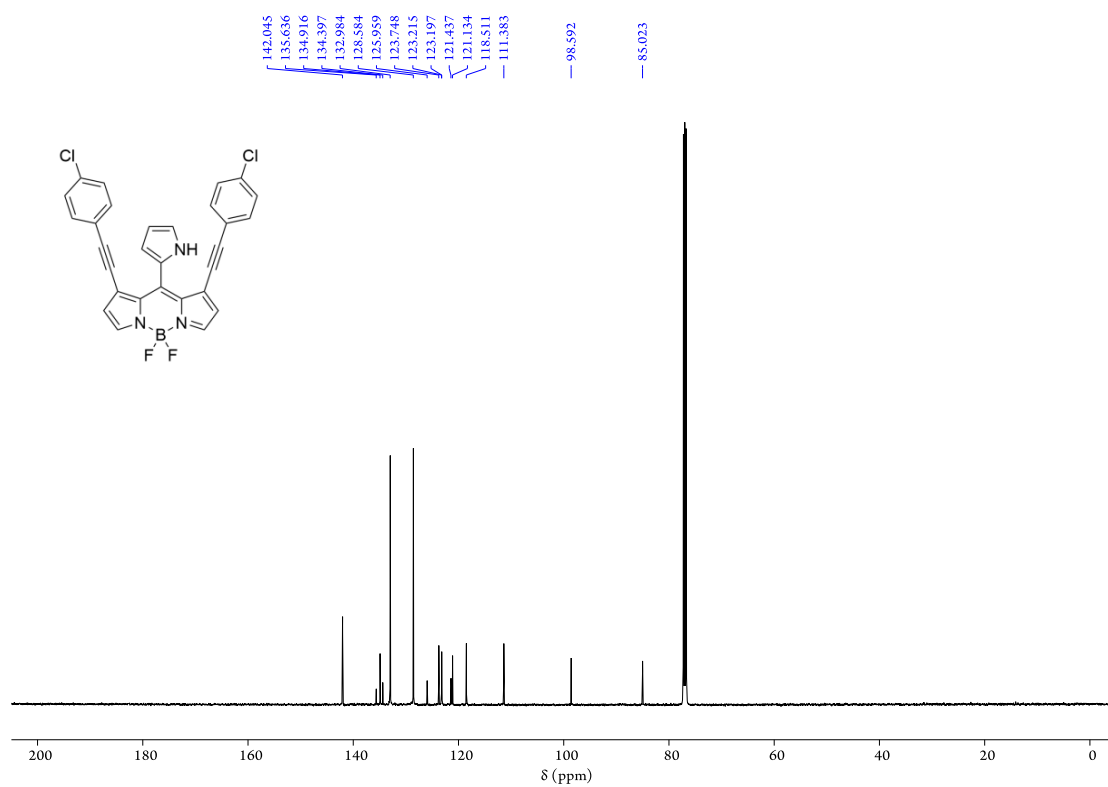

Figure S44.  $^{13}\text{C NMR}$  spectrum of **4bf** in  $\text{CDCl}_3$  at 298 K

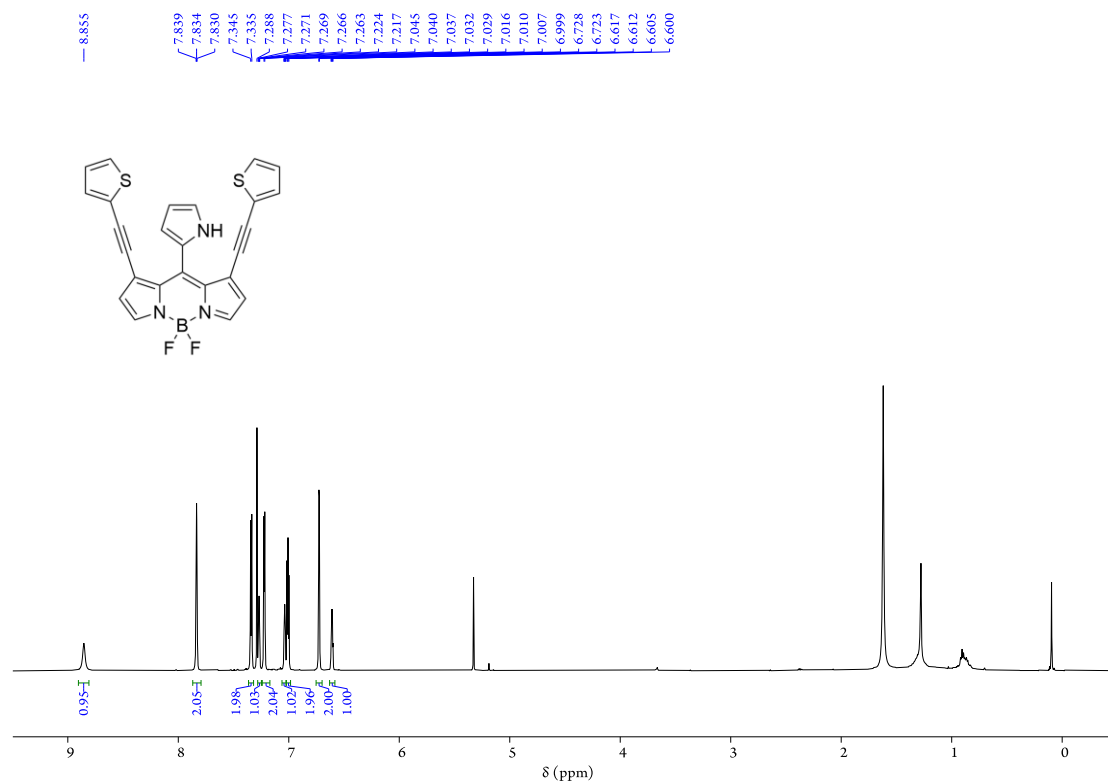

**Figure S45.** <sup>1</sup>H NMR spectrum of **4bg** in CDCl<sub>3</sub> at 298 K

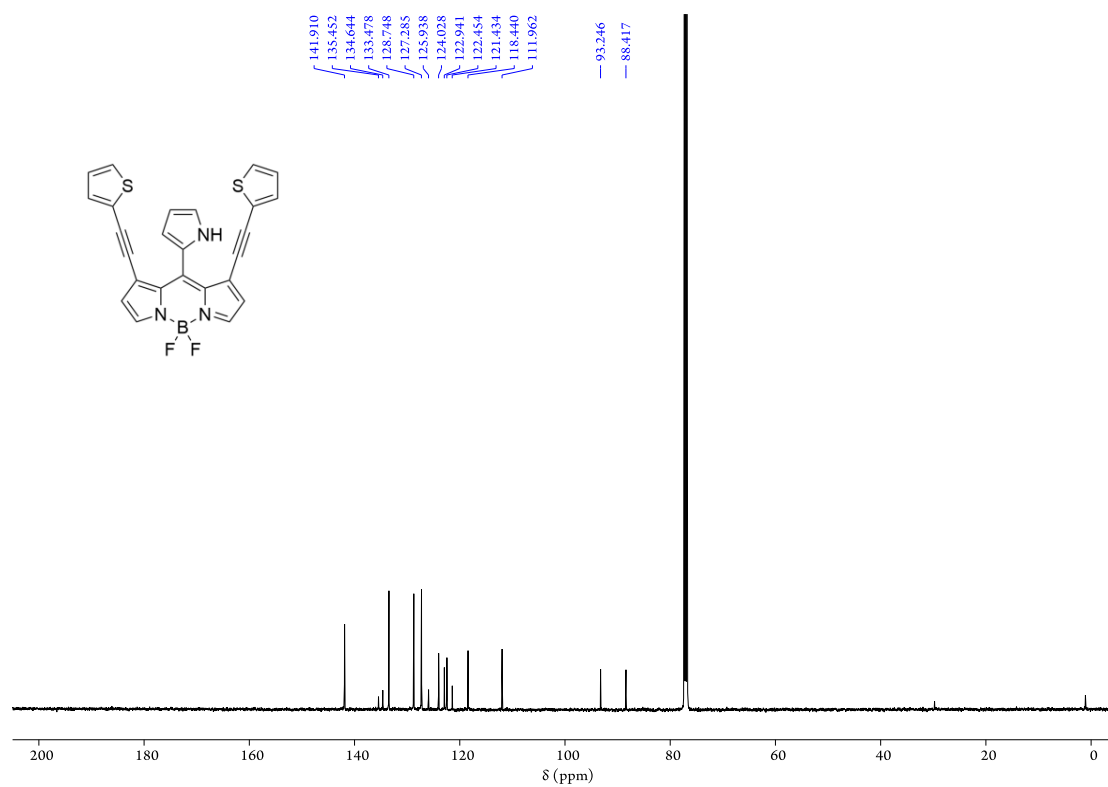

**Figure S46.** <sup>13</sup>C NMR spectrum of **4bg** in CDCl<sub>3</sub> at 298 K

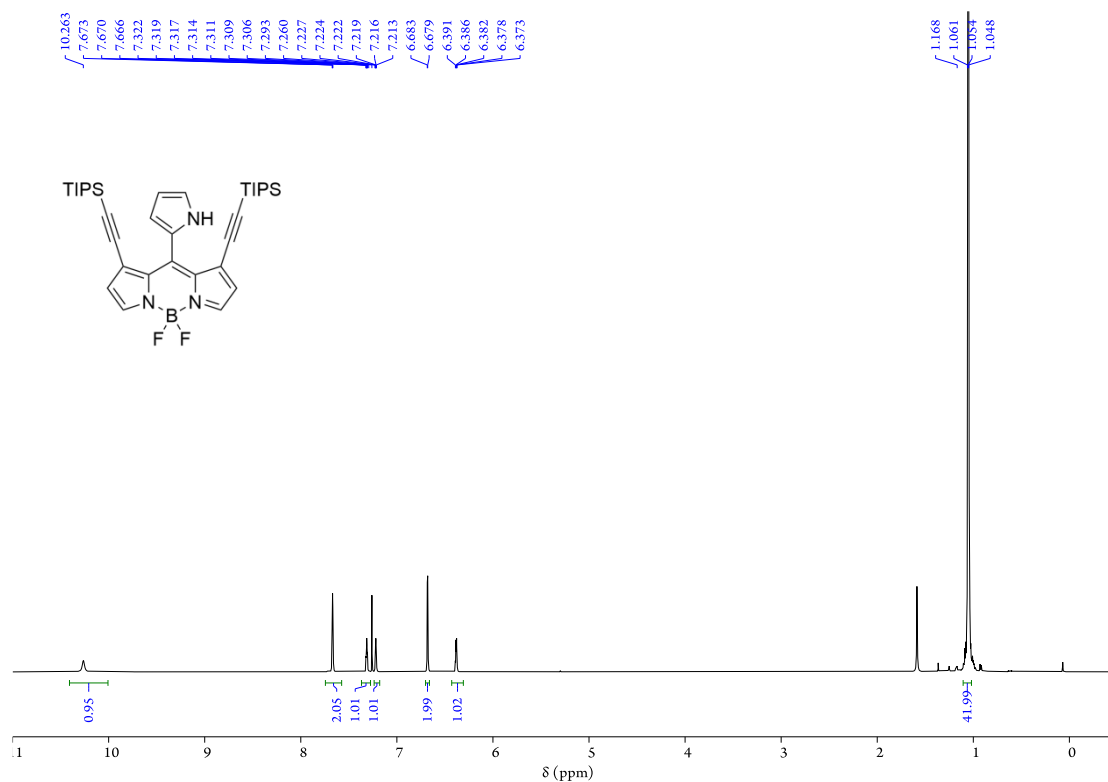

**Figure S47.** <sup>1</sup>H NMR spectrum of **4bh** in CDCl<sub>3</sub> at 298 K

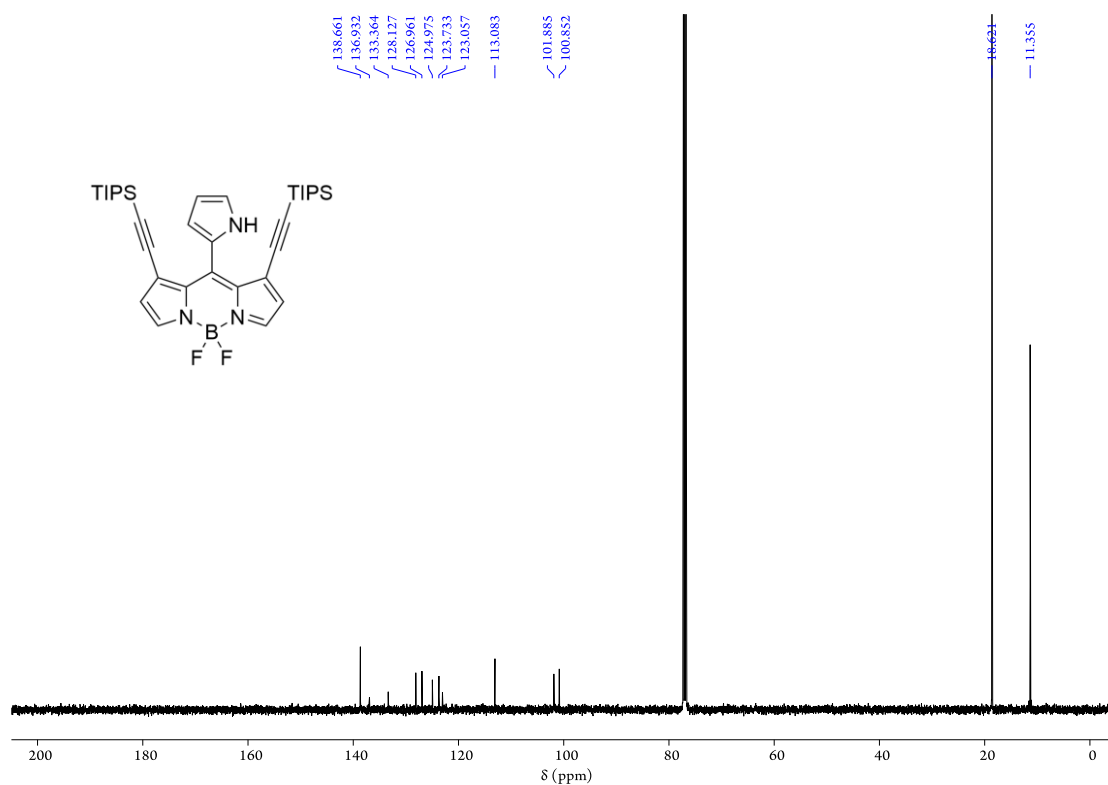

**Figure S48.** <sup>13</sup>C NMR spectrum of **4bh** in CDCl<sub>3</sub> at 298 K

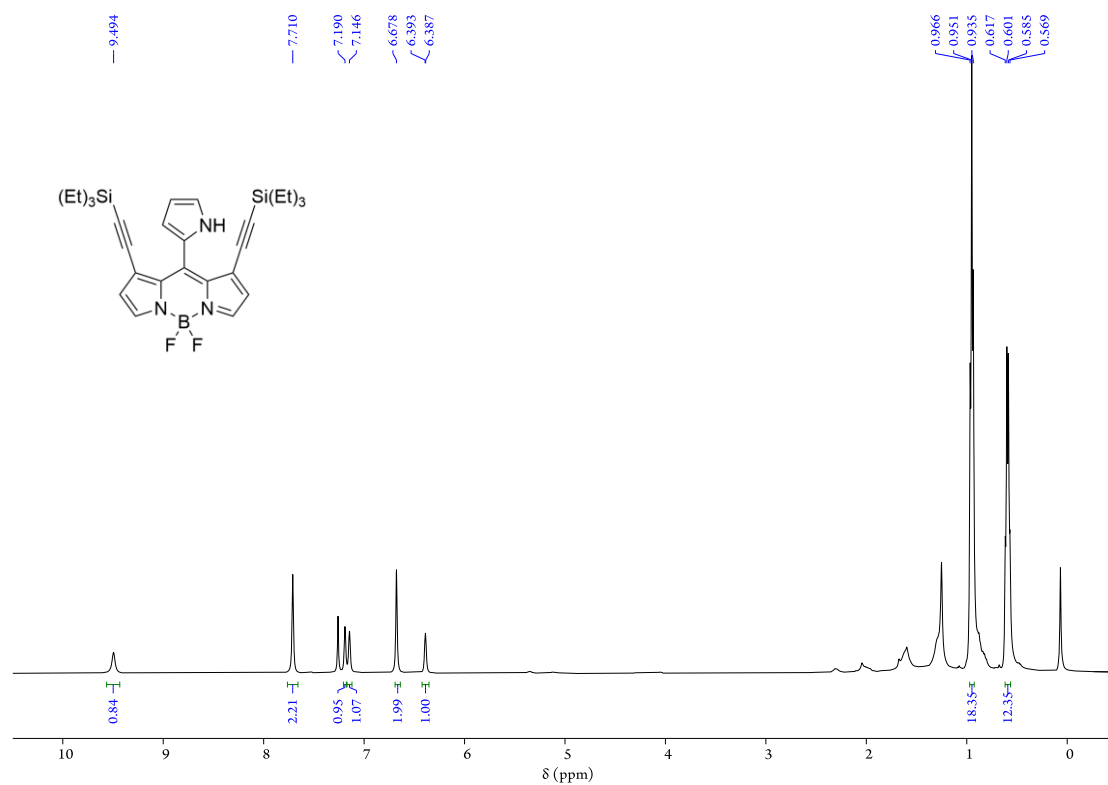

Figure S49. <sup>1</sup>H NMR spectrum of **4bi** in CDCl<sub>3</sub> at 298 K

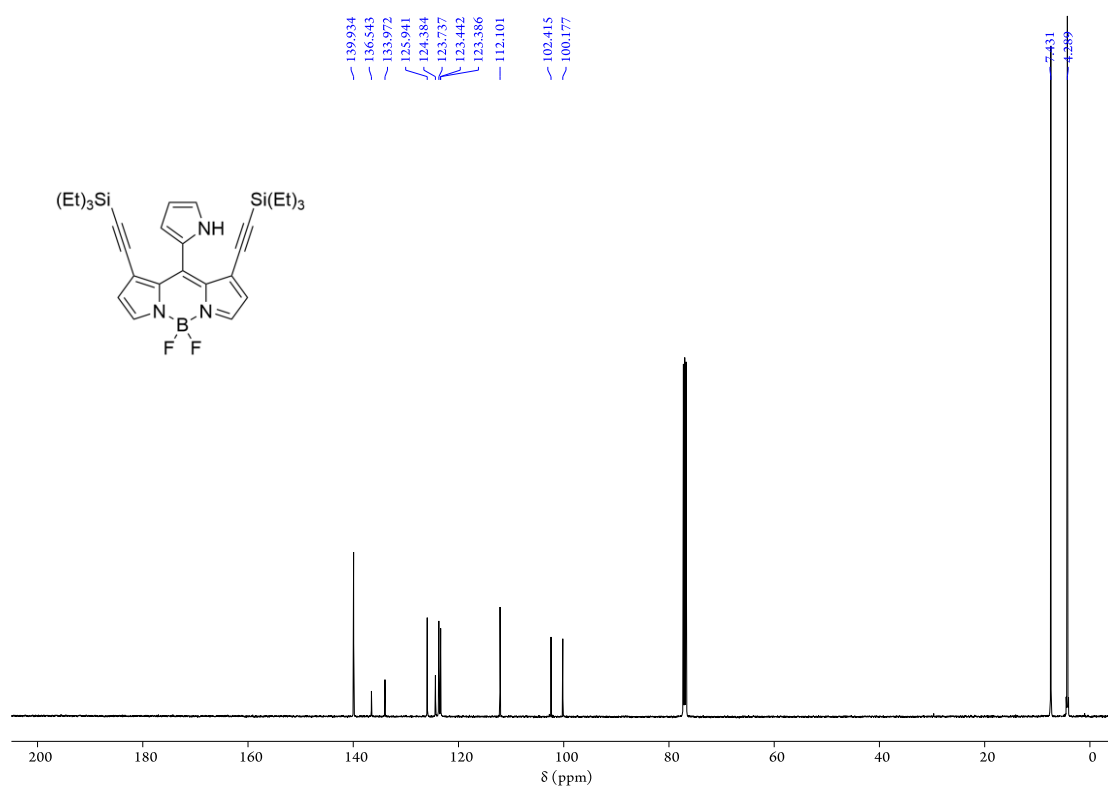

Figure S50. <sup>13</sup>C NMR spectrum of **4bi** in CDCl<sub>3</sub> at 298 K

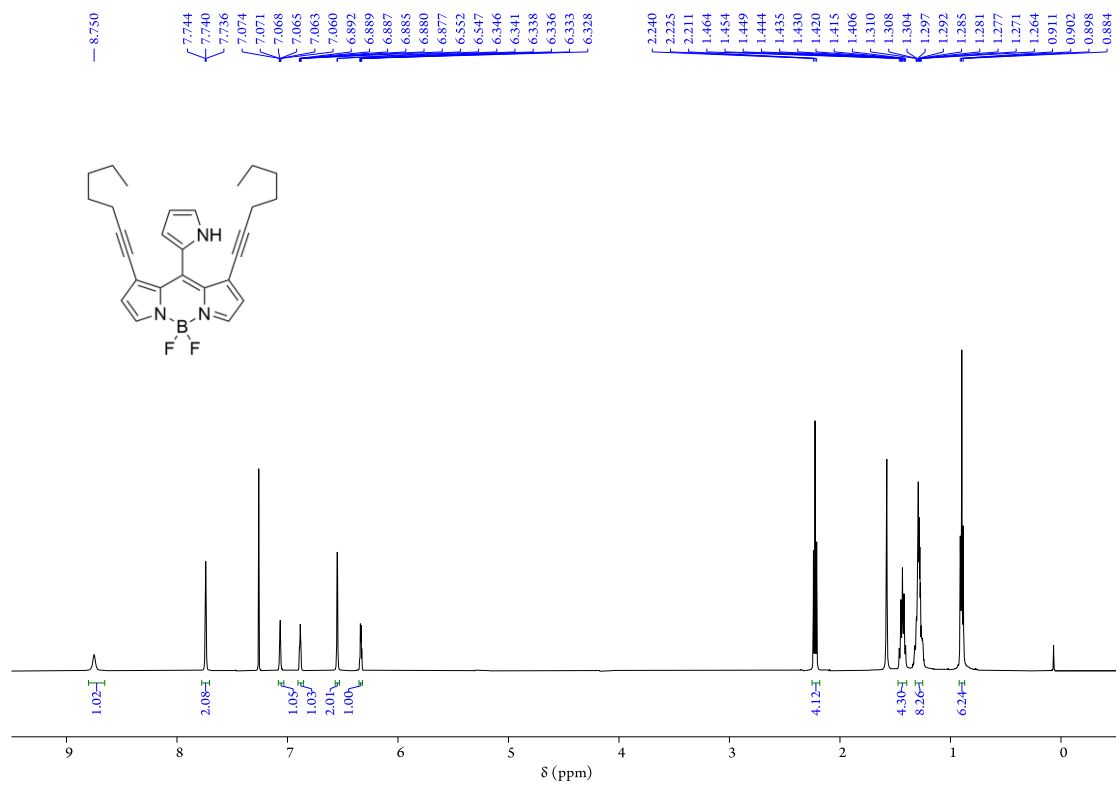

Figure S51. <sup>1</sup>H NMR spectrum of **4bj** in CDCl<sub>3</sub> at 298 K

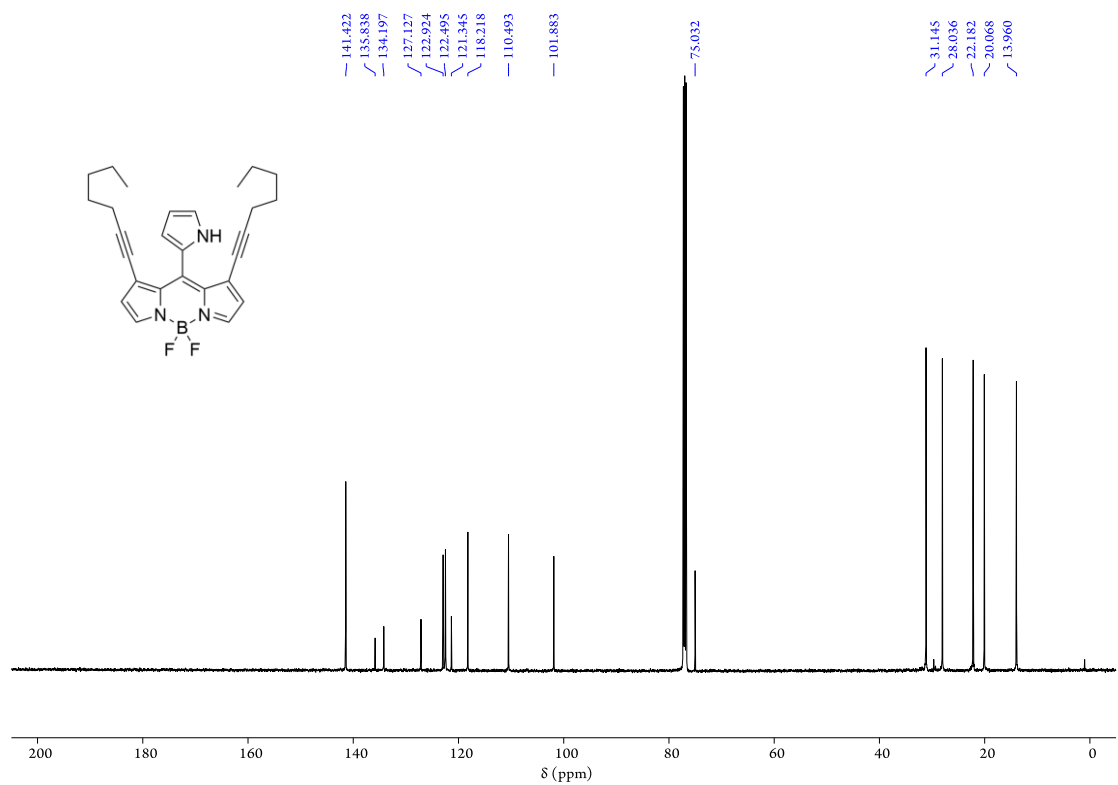

Figure S52. <sup>13</sup>C NMR spectrum of **4bj** in CDCl<sub>3</sub> at 298 K

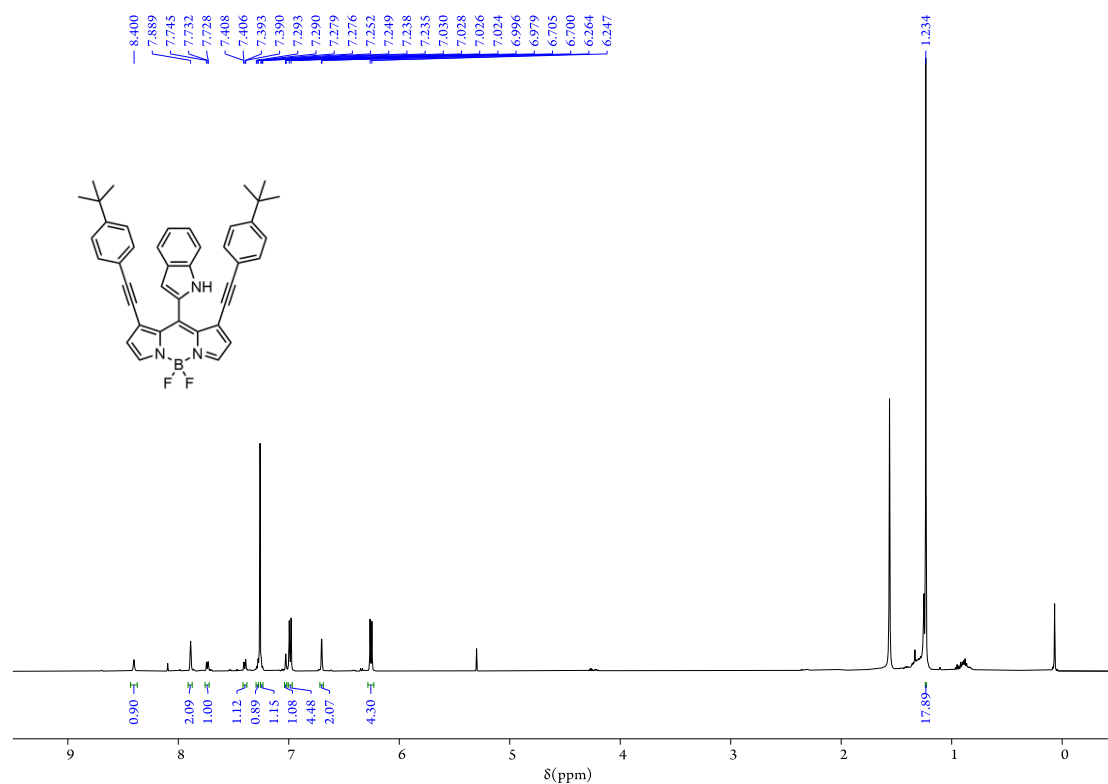

**Figure S53.**  $^1\text{H}$  NMR spectrum of **4ca** in  $\text{CDCl}_3$  at 298 K

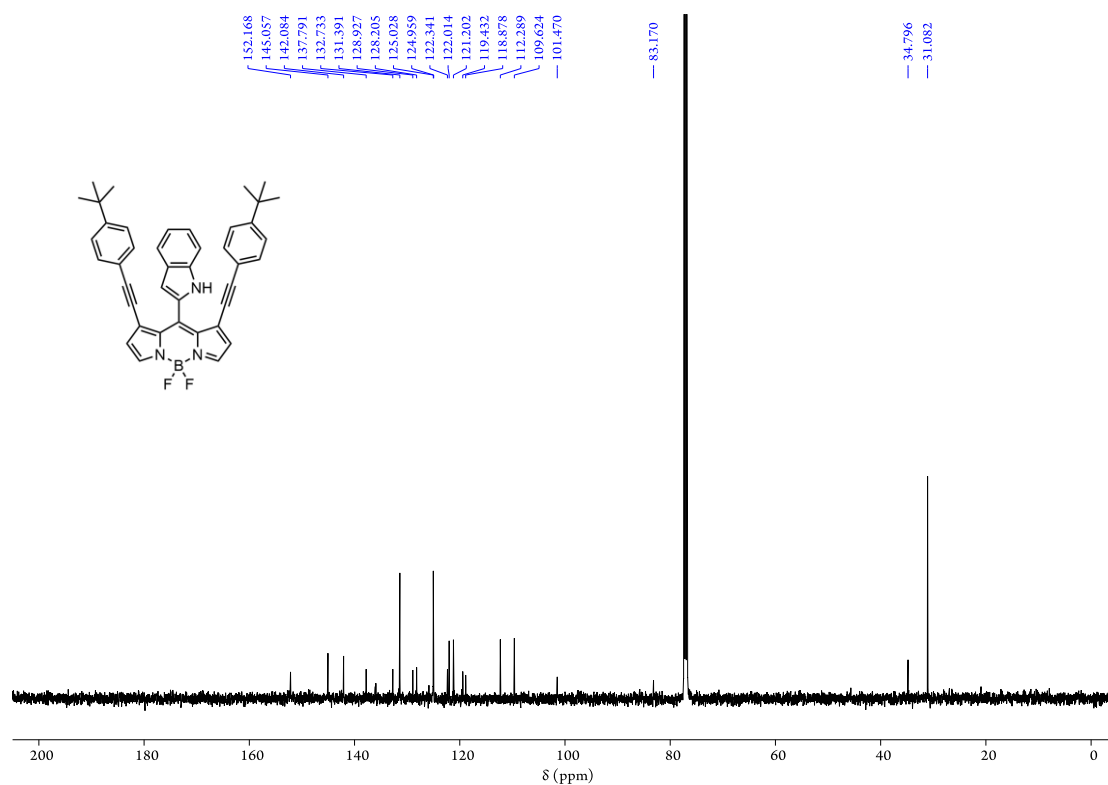

**Figure S54.**  $^{13}\text{C}$  NMR spectrum of **4ca** in  $\text{CDCl}_3$  at 298 K.

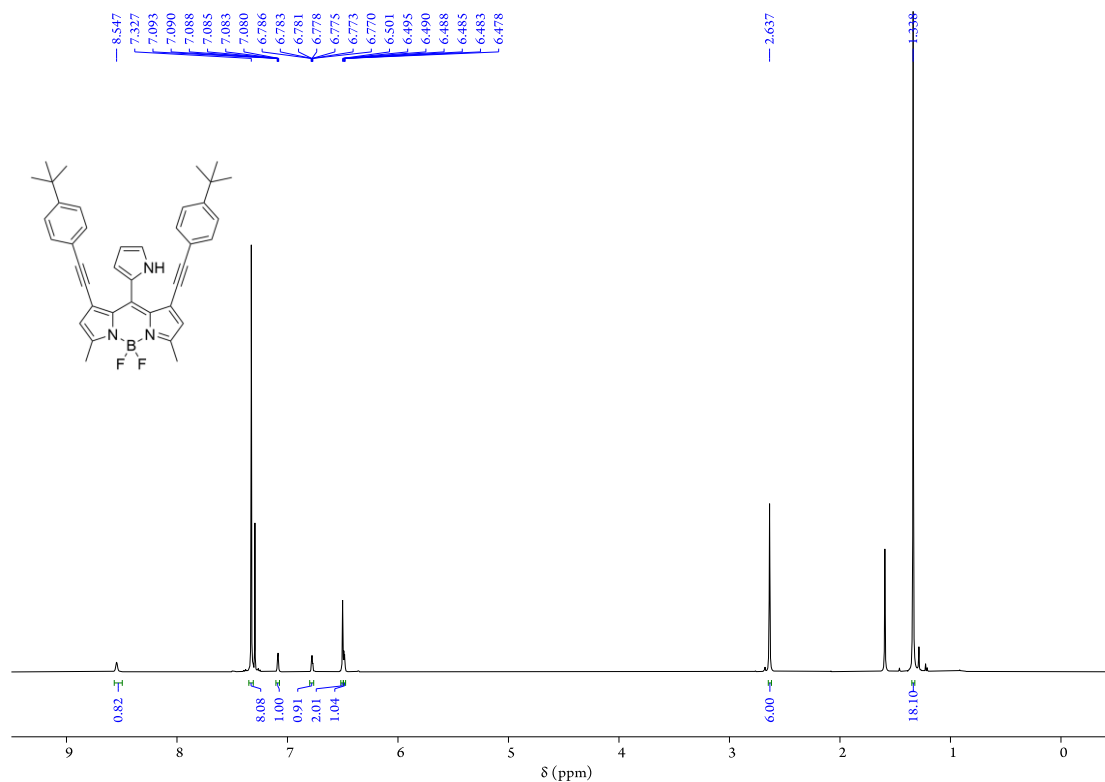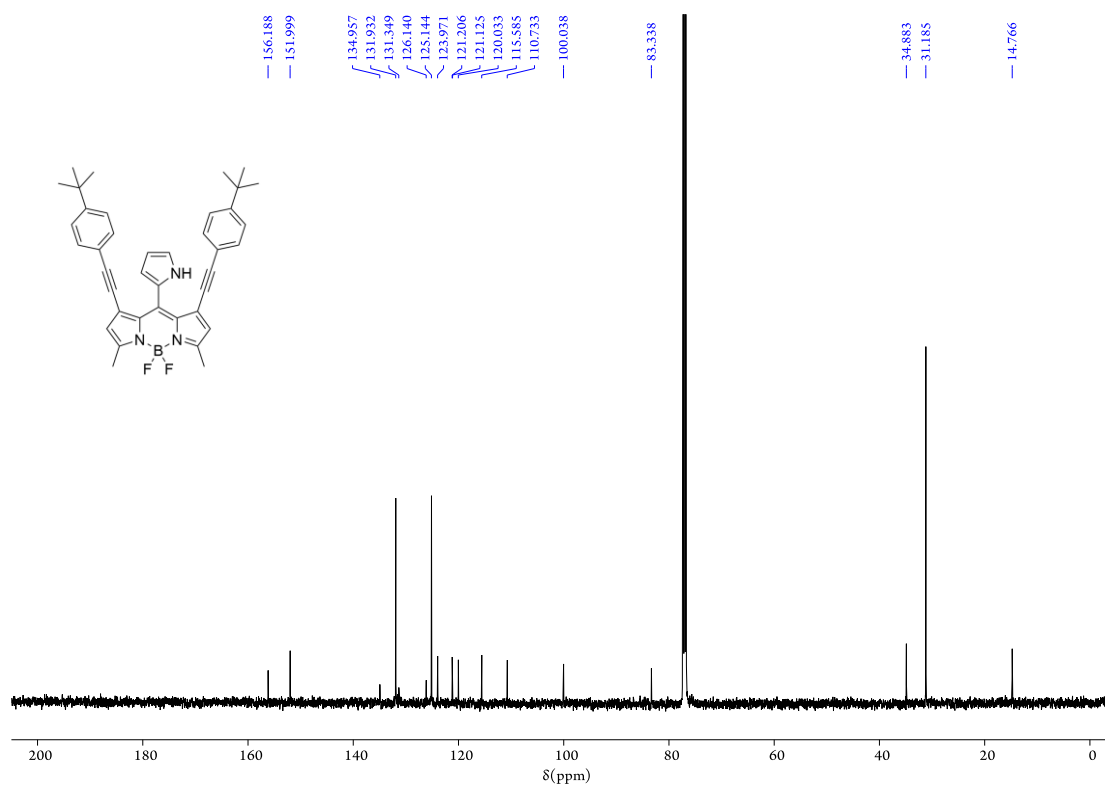



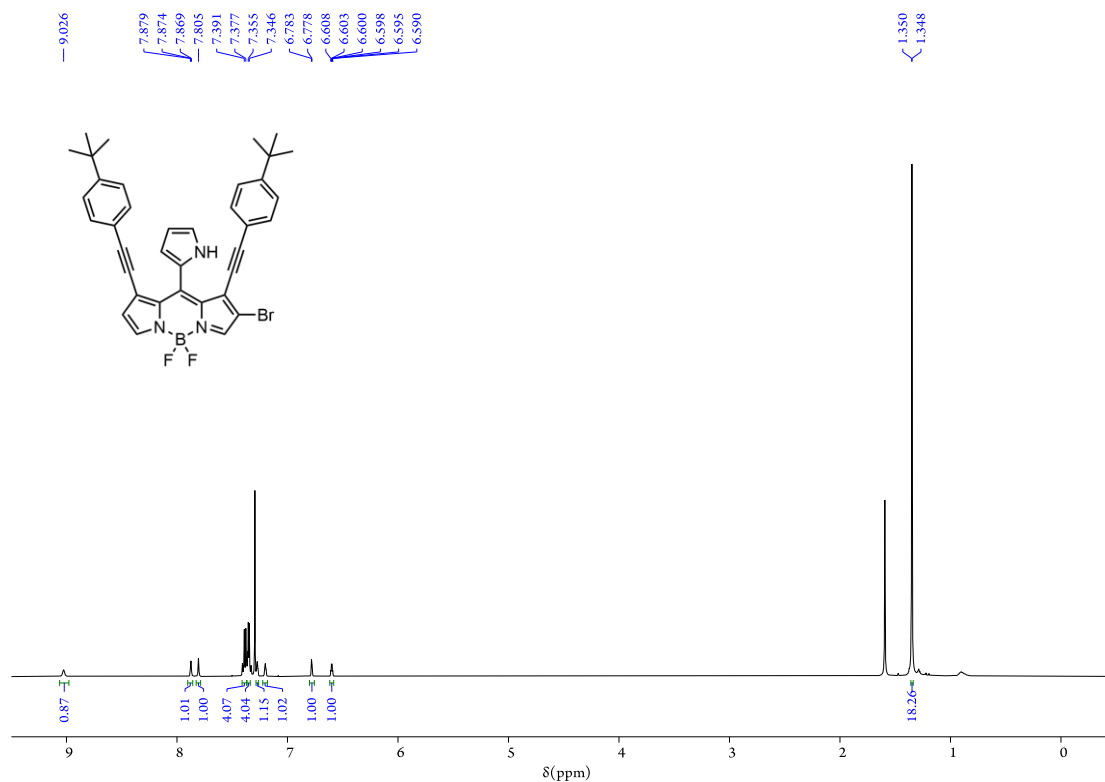

**Figure S57.** <sup>1</sup>H NMR spectrum of **4ea** in CDCl<sub>3</sub> at 298 K

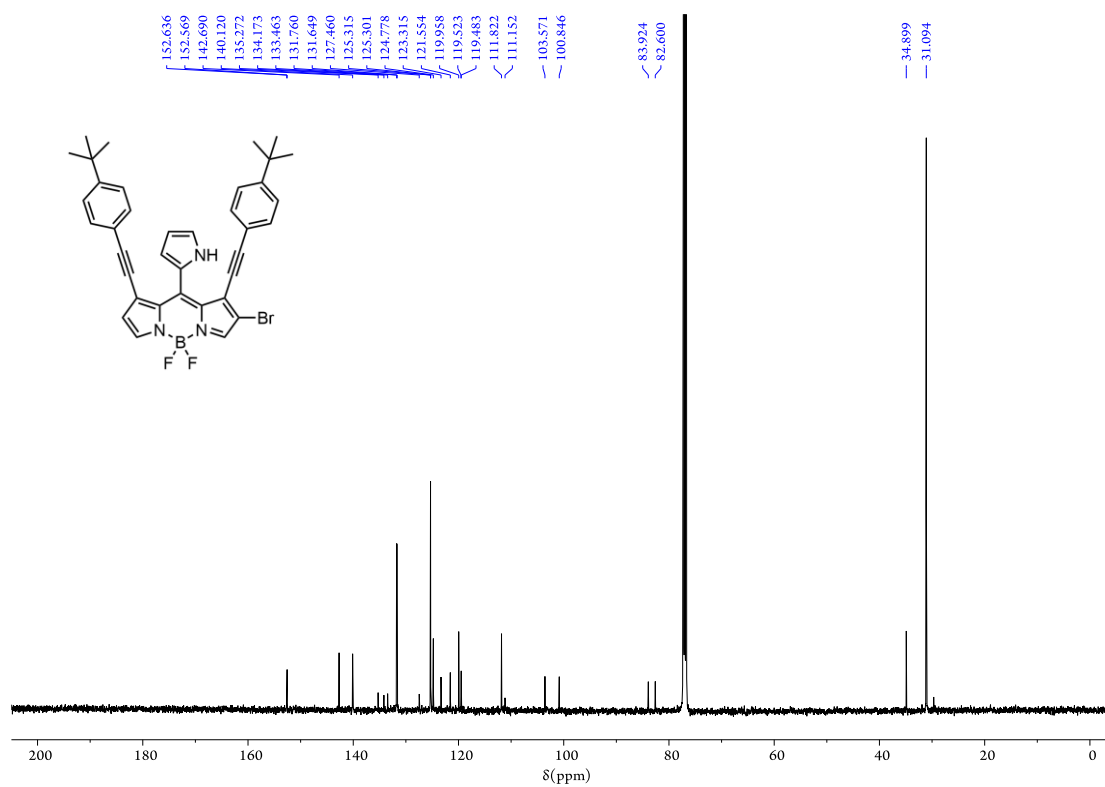

**Figure S58.** <sup>13</sup>C NMR spectrum of **4ea** in CDCl<sub>3</sub> at 298 K.

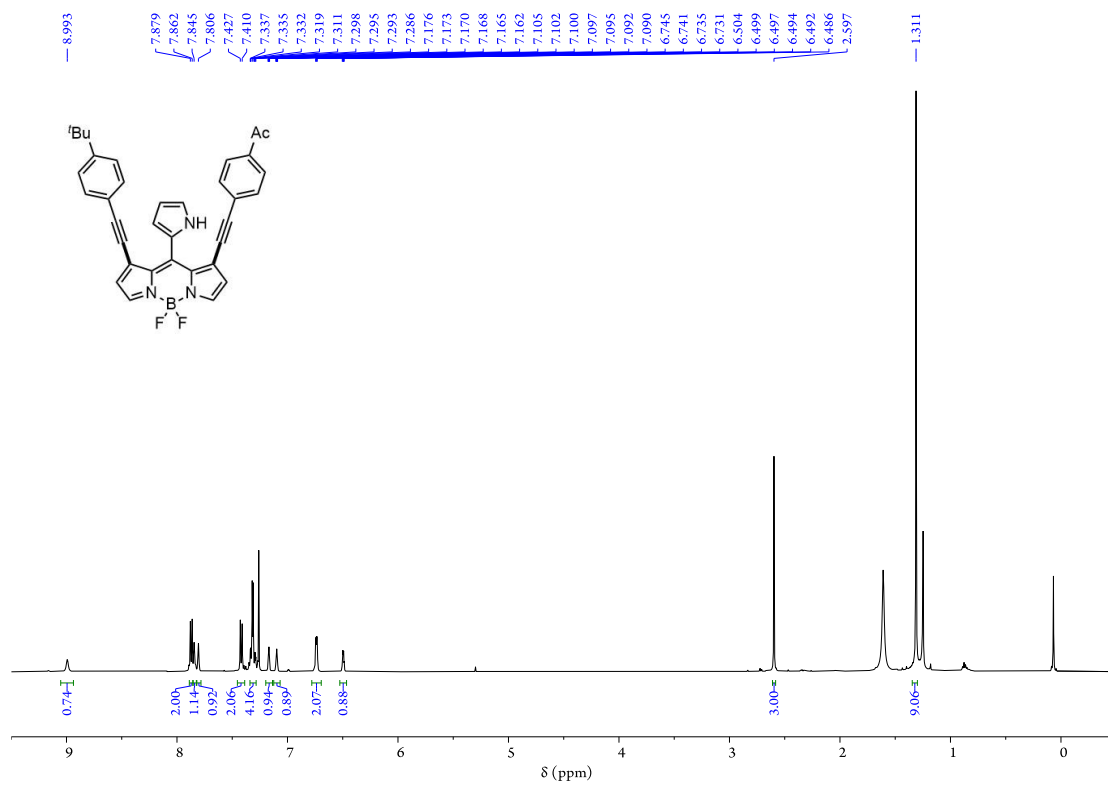

**Figure S59.** <sup>1</sup>H NMR spectrum of **5** in CDCl<sub>3</sub> at 298 K

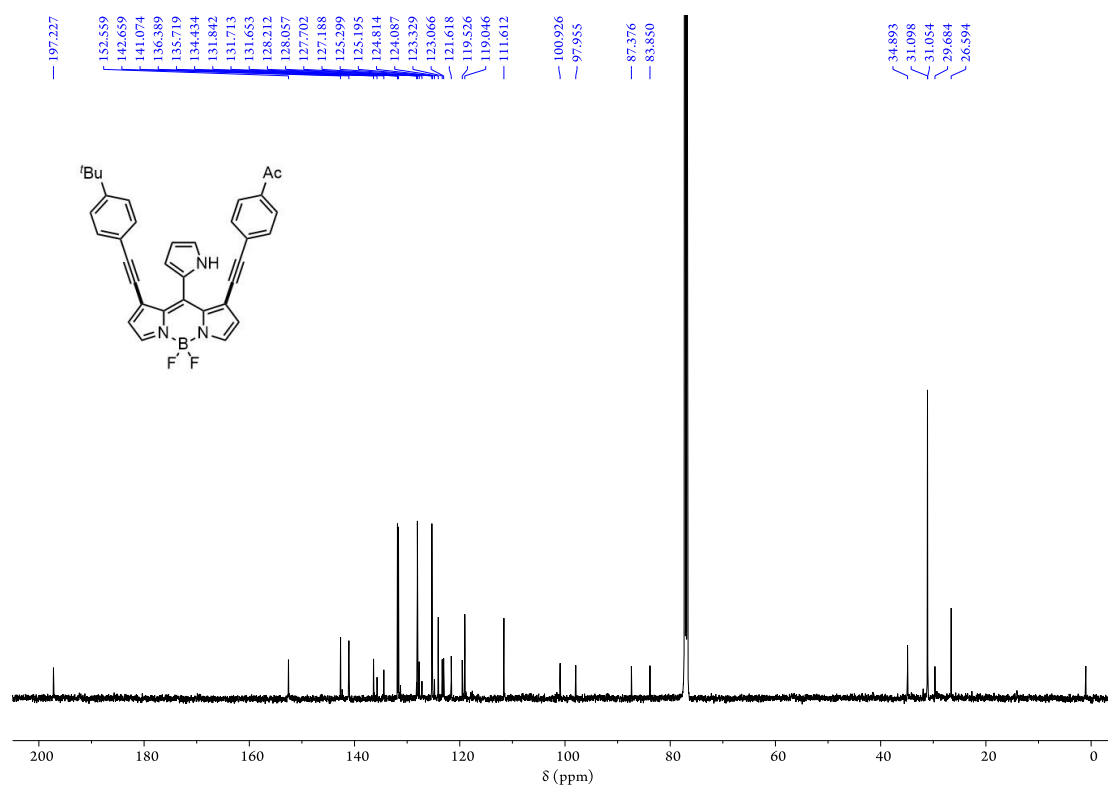

**Figure S60.** <sup>13</sup>C NMR spectrum of **5** in CDCl<sub>3</sub> at 298 K

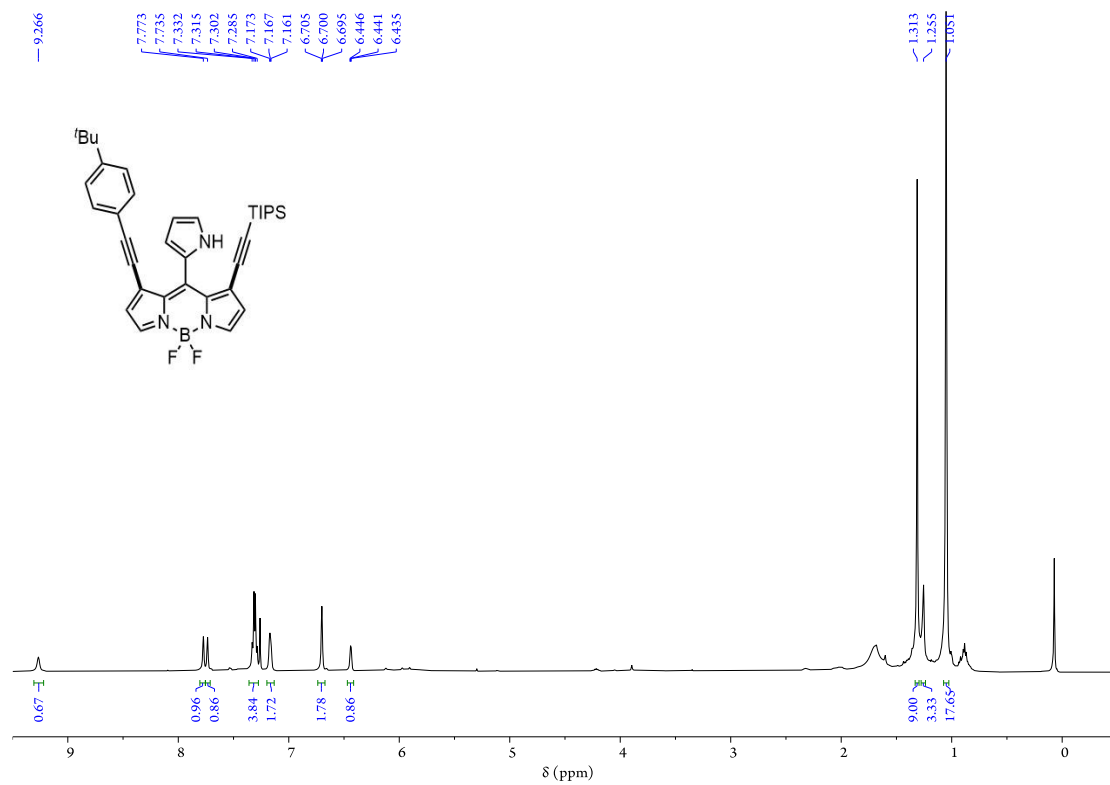

**Figure S61.** <sup>1</sup>H NMR spectrum of **6** in CDCl<sub>3</sub> at 298 K

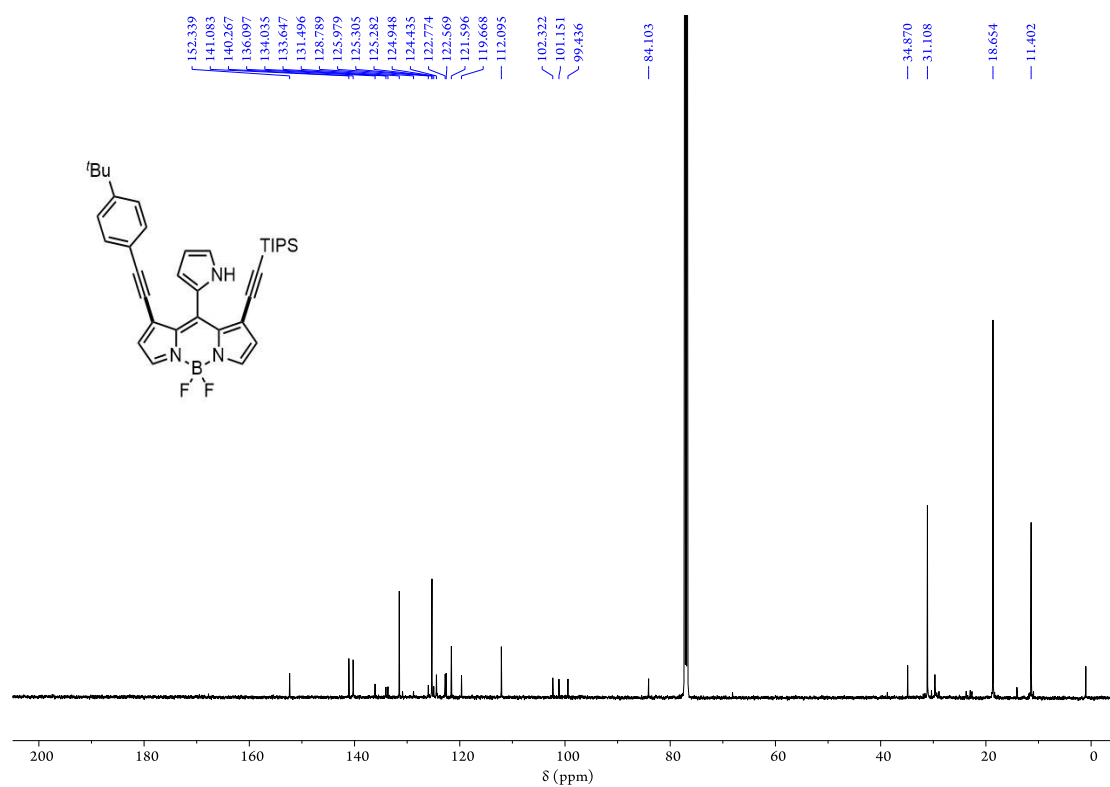

**Figure S62.** <sup>13</sup>C NMR spectrum of **6** in CDCl<sub>3</sub> at 298 K

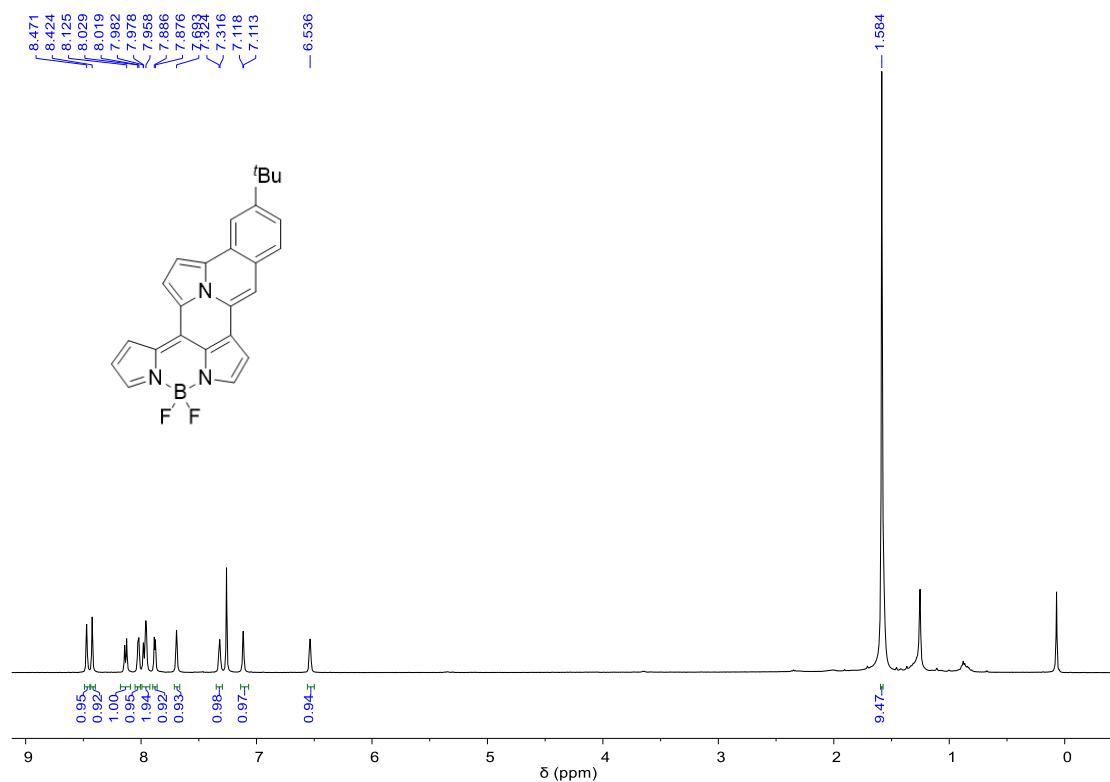

**Figure S63.**  $^1\text{H}$  NMR spectrum of **7** in  $\text{CDCl}_3$  at 298 K.

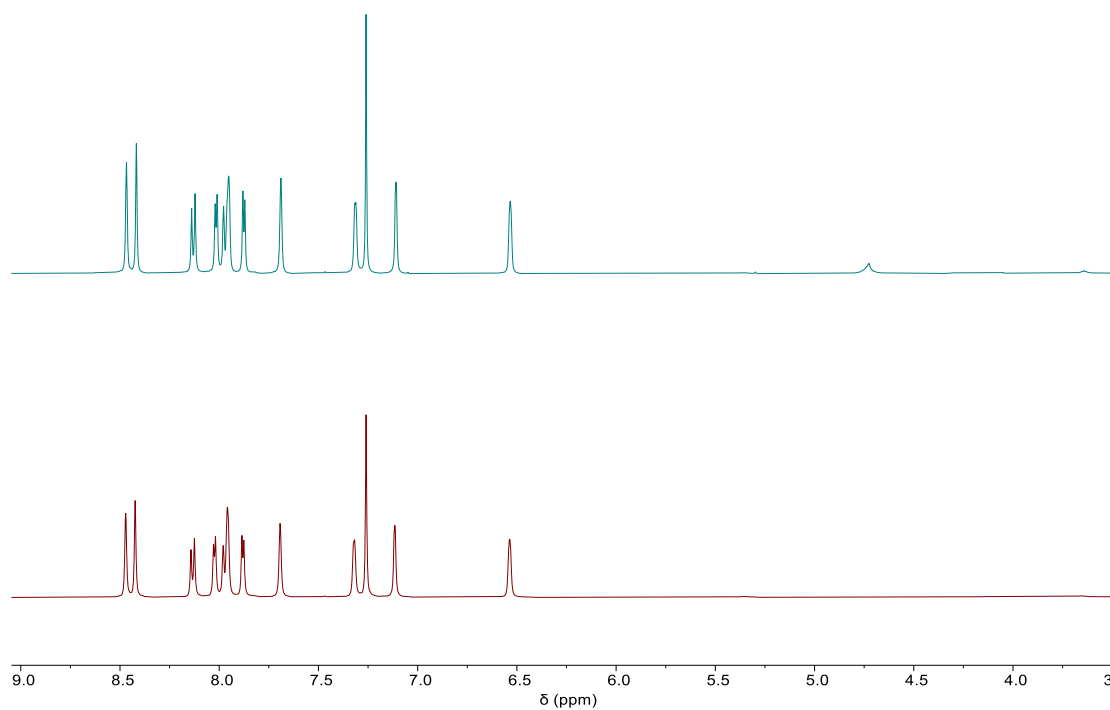

**Figure 64.**  $^1\text{H}$  NMR spectra of **7** with  $\text{D}_2\text{O}$  (top) and **7** (bottom) in  $\text{CDCl}_3$  at 298 K

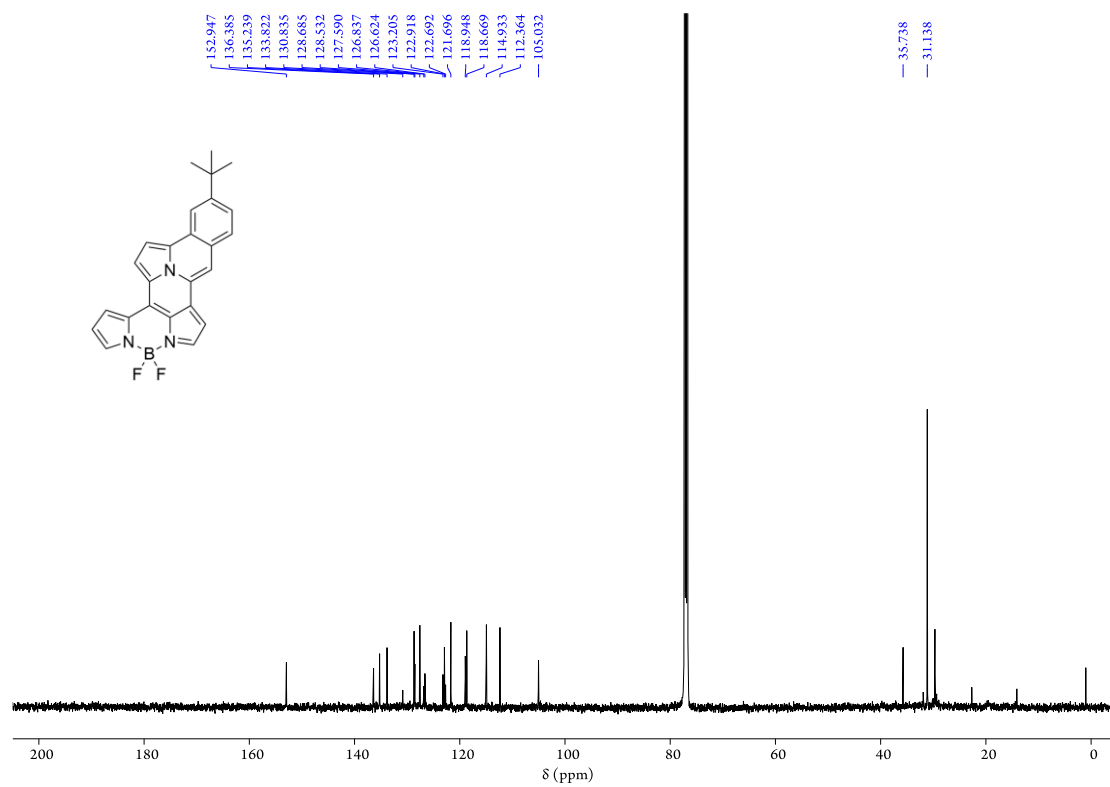

Figure S65.  $^{13}\text{C}$  NMR spectrum of 7 in  $\text{CDCl}_3$  at 298 K.

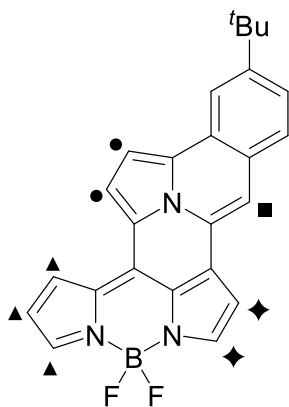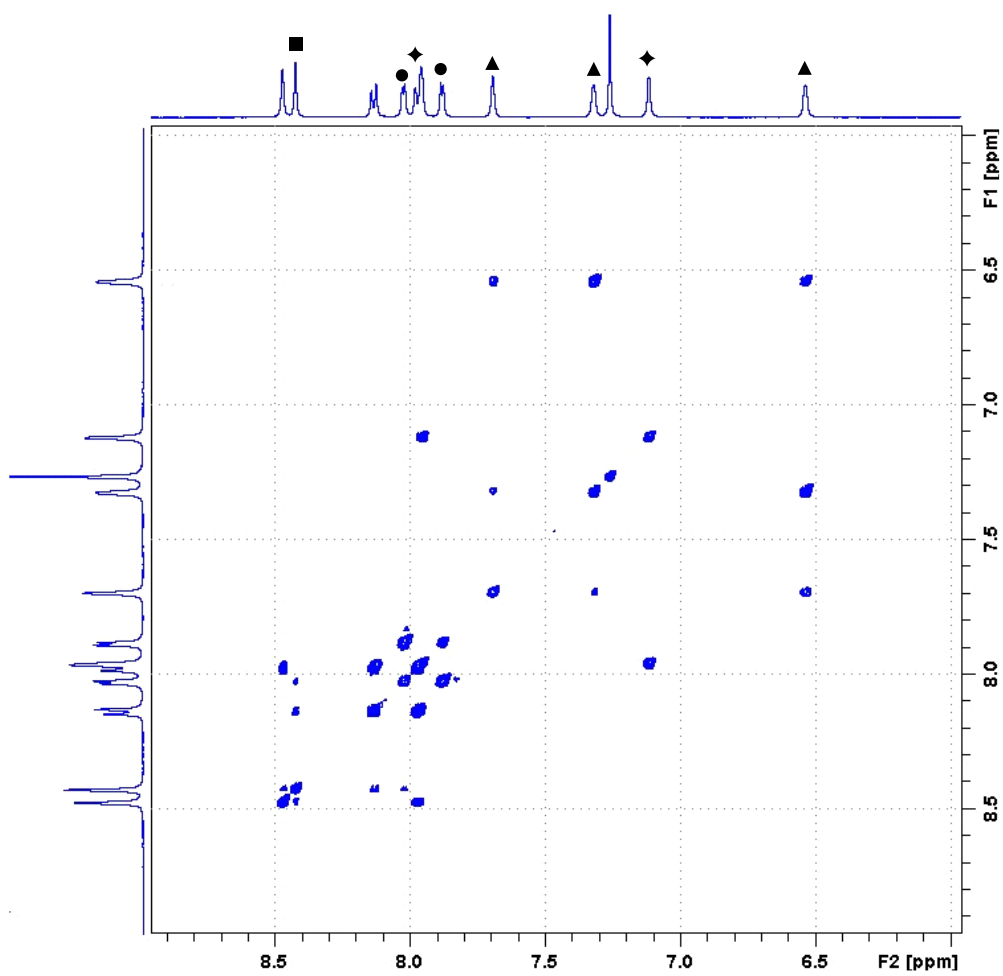

Figure S66.  $^1\text{H}$ - $^1\text{H}$  COSY spectrum of **7** in  $\text{CDCl}_3$  at 298 K

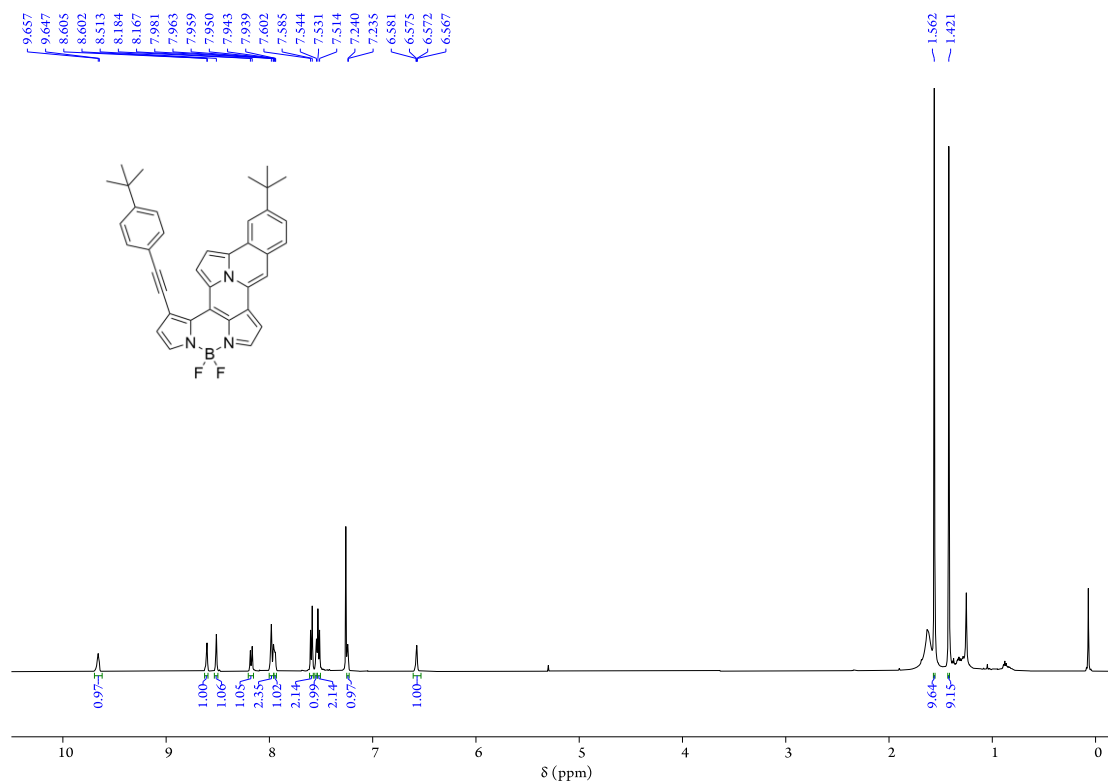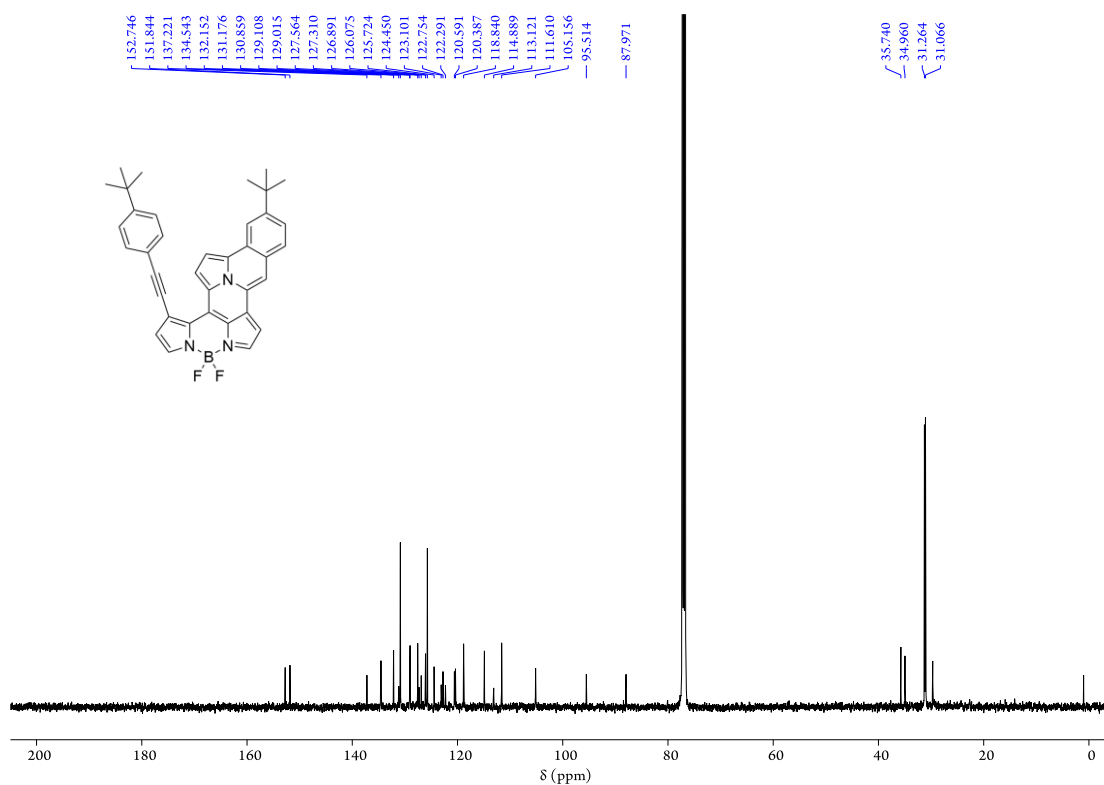

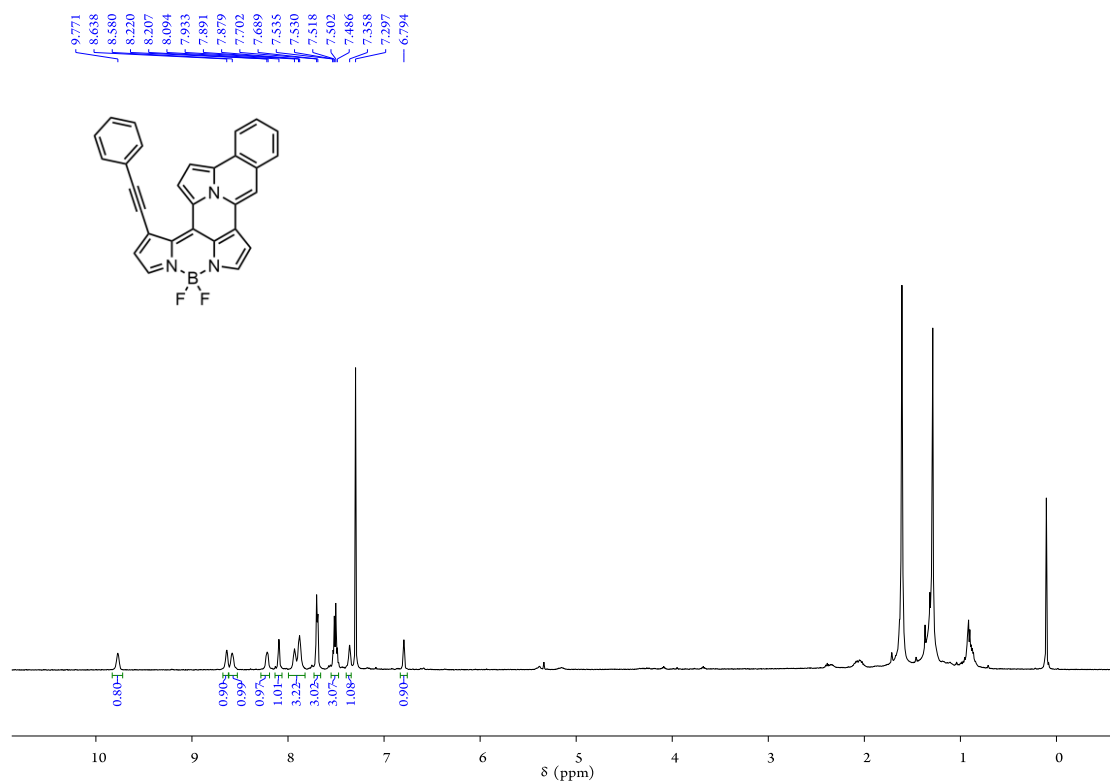

**Figure S69.** <sup>1</sup>H NMR spectrum of **9** in CDCl<sub>3</sub> at 298 K.



#### 4. UV/vis absorption and fluorescence spectra and data

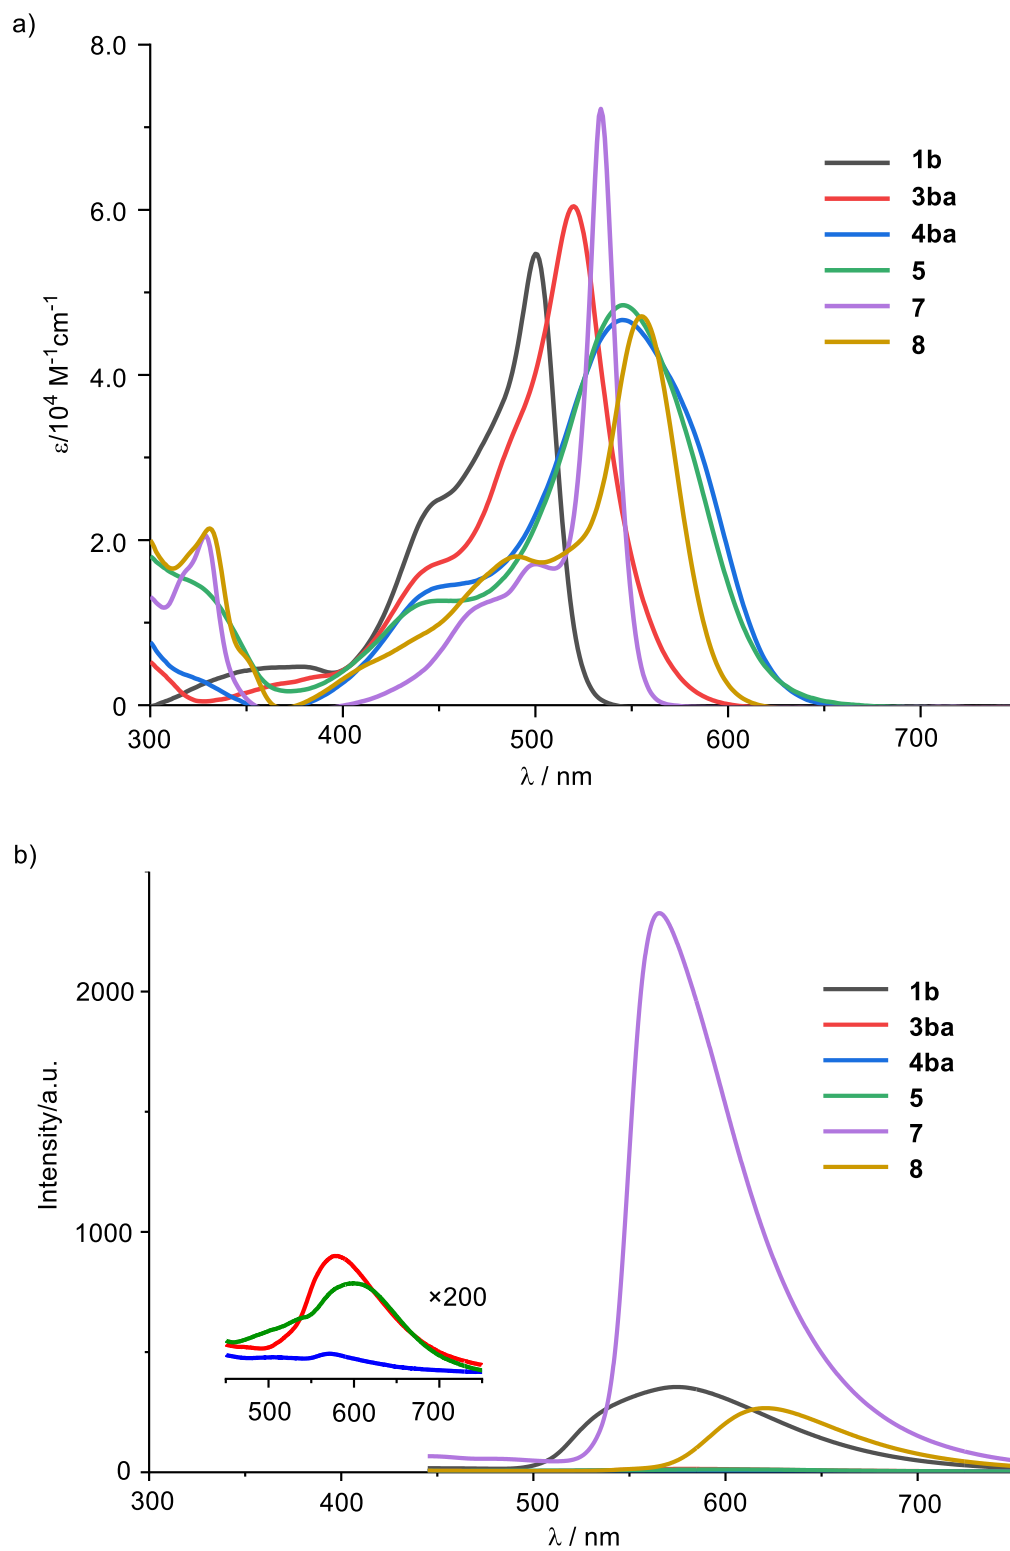

Figure S70. Absorption and fluorescence spectra in  $\text{CH}_2\text{Cl}_2$ .

**Table S1.** UV/vis absorption and fluorescence spectra data

| Compound   | $\lambda_{\text{abs}} / \text{nm}$ ( $\epsilon/10^4 \cdot \text{M}^{-1} \cdot \text{cm}^{-1}$ ) | $\lambda_{\text{em}} / \text{nm}$ | $\Phi_{\text{F}}$ |
|------------|-------------------------------------------------------------------------------------------------|-----------------------------------|-------------------|
| <b>1b</b>  | 500 (5.48), 447 (2.45)                                                                          | 575                               | 0.04              |
| <b>3ba</b> | 520 (6.04), 447 (1.70)                                                                          | 580                               |                   |
| <b>4ba</b> | 545 (4.67), 453 (1.44)                                                                          | 572                               |                   |
| <b>5</b>   | 545 (4.84), 447 (1.26)                                                                          | 600                               |                   |
| <b>7</b>   | 534 (7.22), 500 (1.71), 483 (1.31)                                                              | 566                               | 0.77              |
| <b>8</b>   | 555 (4.71), 490 (1.80)                                                                          | 621                               | 0.047             |

Fluorescence quantum yield was obtained by  $\Phi_{\text{F}} = S_{\text{F}}/S_{\text{R}} \cdot A_{\text{R}}/A_{\text{F}} \cdot \Phi_{\text{R}}$  ( $\lambda_{\text{ex}} = 425 \text{ nm}$ ), here S is the measured integrated emission intensity; A is the optical density; F means sample and R means reference; **1b** was used as the reference ( $\Phi = 0.04$  in  $\text{CH}_2\text{Cl}_2$ ).<sup>S6, S9</sup>

## 5. X-ray crystal data

Single crystals of **4ba**, **5**, and **9** was obtained by diffusion of methanol into toluene solution. A suitable crystal was selected and measured on a SuperNova, Dual, Cu at zero, EosS2 diffractometer. The crystal was kept at 100.01(10) K during data collection. Using Olex<sup>S10</sup>, the structure was solved with the olex2.solve<sup>S11</sup> structure solution program using Charge Flipping and refined with the ShelXL<sup>S12</sup> refinement package using Least Squares minimization.

a)

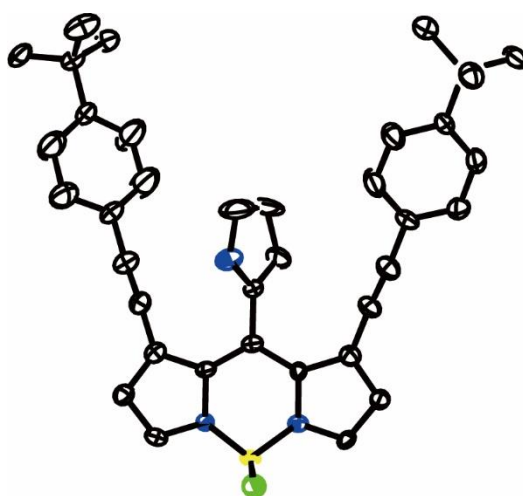

b)

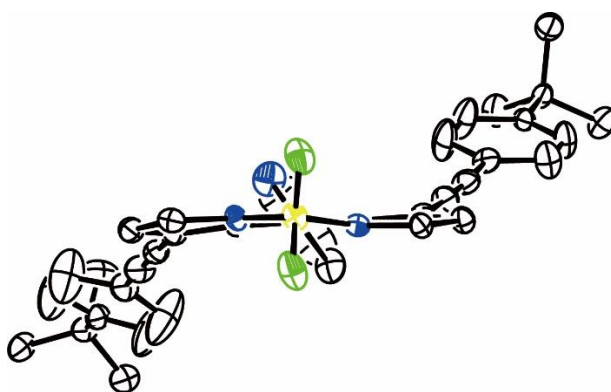

**Figure S71.** X-ray crystal structure of **4ba**: a) top view, b) side view. The thermal ellipsoids are 50% probability level. H atom and solvent molecules are omitted for clarity.

**Table S2.** X-ray Crystal Data for **4ba**.

|                                   |                                                                |                       |
|-----------------------------------|----------------------------------------------------------------|-----------------------|
| Identification code               | exp_2153_sq                                                    |                       |
| Empirical formula                 | C <sub>37</sub> H <sub>34</sub> BF <sub>2</sub> N <sub>3</sub> |                       |
| Formula weight                    | 569.48                                                         |                       |
| Temperature                       | 100.01(10) K                                                   |                       |
| Wavelength                        | 1.54184 Å                                                      |                       |
| Crystal system                    | Orthorhombic                                                   |                       |
| Space group                       | Pca2 <sub>1</sub>                                              |                       |
| Unit cell dimensions              | a = 38.5907(19) Å                                              | $\alpha = 90^\circ$ . |
|                                   | b = 6.1918(3) Å                                                | $\beta = 90^\circ$ .  |
|                                   | c = 29.5351(13) Å                                              | $\gamma = 90^\circ$ . |
| Volume                            | 7057.3(6) Å <sup>3</sup>                                       |                       |
| Z                                 | 4                                                              |                       |
| Density (calculated)              | 1.072 Mg/m <sup>3</sup>                                        |                       |
| Absorption coefficient            | 0.556 mm <sup>-1</sup>                                         |                       |
| F(000)                            | 2400                                                           |                       |
| Crystal size                      | 0.3 x 0.1 x 0.05 mm <sup>3</sup>                               |                       |
| Theta range for data collection   | 2.735 to 71.982°.                                              |                       |
| Index ranges                      | -46<=h<=47, -7<=k<=6, -18<=l<=36                               |                       |
| Reflections collected             | 16481                                                          |                       |
| Independent reflections           | 9240 [R(int) = 0.0422]                                         |                       |
| Completeness to theta = 67.684°   | 99.8 %                                                         |                       |
| Absorption correction             | Semi-empirical from equivalents                                |                       |
| Max. and min. transmission        | 1.00000 and 0.47230                                            |                       |
| Refinement method                 | Full-matrix least-squares on F <sup>2</sup>                    |                       |
| Data / restraints / parameters    | 9240 / 1 / 787                                                 |                       |
| Goodness-of-fit on F <sup>2</sup> | 1.028                                                          |                       |
| Final R indices [I>2sigma(I)]     | R1 = 0.0620, wR2 = 0.1613                                      |                       |
| R indices (all data)              | R1 = 0.0775, wR2 = 0.1784                                      |                       |
| Absolute structure parameter      | 0.3(3)                                                         |                       |
| Extinction coefficient            | n/a                                                            |                       |
| Largest diff. peak and hole       | 0.281 and -0.266 e.Å <sup>-3</sup>                             |                       |
| CCDC                              | 2374385                                                        |                       |

**Table S3.** bond lengths (Å) and angles (°) for**4ba**

|             |           |              |           |
|-------------|-----------|--------------|-----------|
| F(1)-B(1)   | 1.376(7)  | C(12)-C(13)  | 1.418(8)  |
| F(2)-B(1)   | 1.388(6)  | C(13)-C(14)  | 1.392(8)  |
| N(1)-C(22)  | 1.381(6)  | C(13)-C(16)  | 1.417(7)  |
| N(1)-C(25)  | 1.347(6)  | C(14)-H(14)  | 0.9500    |
| N(1)-B(1)   | 1.561(7)  | C(14)-C(15)  | 1.415(8)  |
| N(2)-C(15)  | 1.349(6)  | C(15)-H(15)  | 0.9500    |
| N(2)-C(16)  | 1.398(6)  | C(16)-C(17)  | 1.405(7)  |
| N(2)-B(1)   | 1.523(7)  | C(17)-C(18)  | 1.458(7)  |
| N(3)-H(3)   | 0.8800    | C(17)-C(22)  | 1.417(7)  |
| N(3)-C(18)  | 1.360(7)  | C(18)-C(19)  | 1.394(8)  |
| N(3)-C(21)  | 1.367(9)  | C(19)-H(19)  | 0.9500    |
| C(1)-H(1A)  | 0.9800    | C(19)-C(20)  | 1.467(11) |
| C(1)-H(1B)  | 0.9800    | C(20)-H(20)  | 0.9500    |
| C(1)-H(1C)  | 0.9800    | C(20)-C(21)  | 1.303(13) |
| C(1)-C(4)   | 1.531(8)  | C(21)-H(21)  | 0.9500    |
| C(2)-H(2A)  | 0.9800    | C(22)-C(23)  | 1.424(7)  |
| C(2)-H(2B)  | 0.9800    | C(23)-C(24)  | 1.401(8)  |
| C(2)-H(2C)  | 0.9800    | C(23)-C(26)  | 1.430(7)  |
| C(2)-C(4)   | 1.491(8)  | C(24)-H(24)  | 0.9500    |
| C(3)-H(3A)  | 0.9800    | C(24)-C(25)  | 1.387(7)  |
| C(3)-H(3B)  | 0.9800    | C(25)-H(25)  | 0.9500    |
| C(3)-H(3C)  | 0.9800    | C(26)-C(27)  | 1.190(8)  |
| C(3)-C(4)   | 1.523(9)  | C(27)-C(28)  | 1.437(7)  |
| C(4)-C(5)   | 1.529(8)  | C(28)-C(29)  | 1.371(9)  |
| C(5)-C(6)   | 1.352(11) | C(28)-C(30)  | 1.374(8)  |
| C(5)-C(9)   | 1.342(10) | C(29)-H(29)  | 0.9500    |
| C(6)-H(6)   | 0.9500    | C(29)-C(33)  | 1.392(8)  |
| C(6)-C(7)   | 1.430(11) | C(30)-H(30)  | 0.9500    |
| C(7)-H(7)   | 0.9500    | C(30)-C(31)  | 1.395(8)  |
| C(7)-C(10)  | 1.363(11) | C(31)-H(31)  | 0.9500    |
| C(8)-H(8)   | 0.9500    | C(31)-C(32)  | 1.356(8)  |
| C(8)-C(9)   | 1.384(11) | C(32)-C(33)  | 1.370(8)  |
| C(8)-C(10)  | 1.333(11) | C(32)-C(34)  | 1.538(7)  |
| C(9)-H(9)   | 0.9500    | C(33)-H(33)  | 0.9500    |
| C(10)-C(11) | 1.447(8)  | C(34)-C(35)  | 1.521(9)  |
| C(11)-C(12) | 1.197(8)  | C(34)-C(36)  | 1.551(8)  |
|             |           | C(34)-C(37)  | 1.537(7)  |
|             |           | C(35)-H(35A) | 0.9800    |

|              |           |              |           |
|--------------|-----------|--------------|-----------|
| C(35)-H(35B) | 0.9800    | C(45)-H(45)  | 0.9500    |
| C(35)-H(35C) | 0.9800    | C(45)-C(47)  | 1.368(8)  |
| C(36)-H(36A) | 0.9800    | C(46)-H(46)  | 0.9500    |
| C(36)-H(36B) | 0.9800    | C(46)-C(47)  | 1.393(8)  |
| C(36)-H(36C) | 0.9800    | C(47)-C(48)  | 1.445(7)  |
| C(37)-H(37A) | 0.9800    | C(48)-C(49)  | 1.192(7)  |
| C(37)-H(37B) | 0.9800    | C(49)-C(50)  | 1.431(7)  |
| C(37)-H(37C) | 0.9800    | C(50)-C(51)  | 1.402(7)  |
| F(3)-B(2)    | 1.375(6)  | C(50)-C(53)  | 1.427(7)  |
| F(4)-B(2)    | 1.400(7)  | C(51)-H(51)  | 0.9500    |
| N(4)-H(4)    | 0.8800    | C(51)-C(52)  | 1.389(7)  |
| N(4)-C(55)   | 1.366(7)  | C(52)-H(52)  | 0.9500    |
| N(4)-C(58)   | 1.359(9)  | C(53)-C(54)  | 1.388(7)  |
| N(5)-C(60)   | 1.394(6)  | C(54)-C(55)  | 1.477(7)  |
| N(5)-C(63)   | 1.356(6)  | C(54)-C(60)  | 1.418(7)  |
| N(5)-B(2)    | 1.538(7)  | C(55)-C(59)  | 1.375(8)  |
| N(6)-C(52)   | 1.338(6)  | C(56)-H(56A) | 0.9800    |
| N(6)-C(53)   | 1.383(6)  | C(56)-H(56B) | 0.9800    |
| N(6)-B(2)    | 1.539(7)  | C(56)-H(56C) | 0.9800    |
| C(38)-H(38A) | 0.9800    | C(56)-C(72)  | 1.534(7)  |
| C(38)-H(38B) | 0.9800    | C(57)-H(57)  | 0.9500    |
| C(38)-H(38C) | 0.9800    | C(57)-C(58)  | 1.380(13) |
| C(38)-C(40)  | 1.534(8)  | C(57)-C(59)  | 1.414(10) |
| C(39)-H(39A) | 0.9800    | C(58)-H(58)  | 0.9500    |
| C(39)-H(39B) | 0.9800    | C(59)-H(59)  | 0.9500    |
| C(39)-H(39C) | 0.9800    | C(60)-C(61)  | 1.423(7)  |
| C(39)-C(40)  | 1.512(10) | C(61)-C(62)  | 1.423(7)  |
| C(40)-C(41)  | 1.548(9)  | C(61)-C(64)  | 1.408(7)  |
| C(40)-C(42)  | 1.534(7)  | C(62)-H(62)  | 0.9500    |
| C(41)-H(41A) | 0.9800    | C(62)-C(63)  | 1.388(7)  |
| C(41)-H(41B) | 0.9800    | C(63)-H(63)  | 0.9500    |
| C(41)-H(41C) | 0.9800    | C(64)-C(65)  | 1.203(8)  |
| C(42)-C(43)  | 1.384(8)  | C(65)-C(66)  | 1.431(8)  |
| C(42)-C(44)  | 1.394(8)  | C(66)-C(67)  | 1.378(9)  |
| C(43)-H(43)  | 0.9500    | C(66)-C(71)  | 1.403(8)  |
| C(43)-C(46)  | 1.382(8)  | C(67)-H(67)  | 0.9500    |
| C(44)-H(44)  | 0.9500    | C(67)-C(68)  | 1.388(8)  |
| C(44)-C(45)  | 1.397(8)  | C(68)-H(68)  | 0.9500    |

|                  |          |                   |          |
|------------------|----------|-------------------|----------|
| C(68)-C(69)      | 1.417(7) | C(4)-C(3)-H(3A)   | 109.5    |
| C(69)-C(70)      | 1.386(8) | C(4)-C(3)-H(3B)   | 109.5    |
| C(69)-C(72)      | 1.537(7) | C(4)-C(3)-H(3C)   | 109.5    |
| C(70)-H(70)      | 0.9500   | C(2)-C(4)-C(1)    | 108.1(5) |
| C(70)-C(71)      | 1.385(8) | C(2)-C(4)-C(3)    | 110.5(5) |
| C(71)-H(71)      | 0.9500   | C(2)-C(4)-C(5)    | 111.5(5) |
| C(72)-C(73)      | 1.521(7) | C(3)-C(4)-C(1)    | 107.6(6) |
| C(72)-C(74)      | 1.544(7) | C(3)-C(4)-C(5)    | 108.4(5) |
| C(73)-H(73A)     | 0.9800   | C(5)-C(4)-C(1)    | 110.7(5) |
| C(73)-H(73B)     | 0.9800   | C(6)-C(5)-C(4)    | 122.0(6) |
| C(73)-H(73C)     | 0.9800   | C(9)-C(5)-C(4)    | 124.4(6) |
| C(74)-H(74A)     | 0.9800   | C(9)-C(5)-C(6)    | 113.5(7) |
| C(74)-H(74B)     | 0.9800   | C(5)-C(6)-H(6)    | 118.3    |
| C(74)-H(74C)     | 0.9800   | C(5)-C(6)-C(7)    | 123.4(8) |
| C(22)-N(1)-B(1)  | 125.5(4) | C(7)-C(6)-H(6)    | 118.3    |
| C(25)-N(1)-C(22) | 108.2(4) | C(6)-C(7)-H(7)    | 120.7    |
| C(25)-N(1)-B(1)  | 125.2(4) | C(10)-C(7)-C(6)   | 118.7(8) |
| C(15)-N(2)-C(16) | 107.2(4) | C(10)-C(7)-H(7)   | 120.7    |
| C(15)-N(2)-B(1)  | 124.9(4) | C(9)-C(8)-H(8)    | 119.8    |
| C(16)-N(2)-B(1)  | 127.5(4) | C(10)-C(8)-H(8)   | 119.8    |
| C(18)-N(3)-H(3)  | 125.5    | C(10)-C(8)-C(9)   | 120.4(8) |
| C(18)-N(3)-C(21) | 108.9(6) | C(5)-C(9)-C(8)    | 125.1(8) |
| C(21)-N(3)-H(3)  | 125.5    | C(5)-C(9)-H(9)    | 117.5    |
| H(1A)-C(1)-H(1B) | 109.5    | C(8)-C(9)-H(9)    | 117.5    |
| H(1A)-C(1)-H(1C) | 109.5    | C(7)-C(10)-C(11)  | 120.6(6) |
| H(1B)-C(1)-H(1C) | 109.5    | C(8)-C(10)-C(7)   | 118.3(7) |
| C(4)-C(1)-H(1A)  | 109.5    | C(8)-C(10)-C(11)  | 121.1(6) |
| C(4)-C(1)-H(1B)  | 109.5    | C(12)-C(11)-C(10) | 176.2(7) |
| C(4)-C(1)-H(1C)  | 109.5    | C(11)-C(12)-C(13) | 176.0(6) |
| H(2A)-C(2)-H(2B) | 109.5    | C(14)-C(13)-C(12) | 125.6(5) |
| H(2A)-C(2)-H(2C) | 109.5    | C(14)-C(13)-C(16) | 107.8(5) |
| H(2B)-C(2)-H(2C) | 109.5    | C(16)-C(13)-C(12) | 126.3(5) |
| C(4)-C(2)-H(2A)  | 109.5    | C(13)-C(14)-H(14) | 127.1    |
| C(4)-C(2)-H(2B)  | 109.5    | C(13)-C(14)-C(15) | 105.8(5) |
| C(4)-C(2)-H(2C)  | 109.5    | C(15)-C(14)-H(14) | 127.1    |
| H(3A)-C(3)-H(3B) | 109.5    | N(2)-C(15)-C(14)  | 111.0(4) |
| H(3A)-C(3)-H(3C) | 109.5    | N(2)-C(15)-H(15)  | 124.5    |
| H(3B)-C(3)-H(3C) | 109.5    | C(14)-C(15)-H(15) | 124.5    |

|                   |          |                     |          |
|-------------------|----------|---------------------|----------|
| N(2)-C(16)-C(13)  | 108.1(4) | C(28)-C(30)-H(30)   | 119.8    |
| N(2)-C(16)-C(17)  | 119.3(4) | C(28)-C(30)-C(31)   | 120.4(6) |
| C(17)-C(16)-C(13) | 132.6(5) | C(31)-C(30)-H(30)   | 119.8    |
| C(16)-C(17)-C(18) | 120.0(5) | C(30)-C(31)-H(31)   | 118.7    |
| C(16)-C(17)-C(22) | 120.1(4) | C(32)-C(31)-C(30)   | 122.7(6) |
| C(22)-C(17)-C(18) | 119.9(5) | C(32)-C(31)-H(31)   | 118.7    |
| N(3)-C(18)-C(17)  | 124.1(5) | C(31)-C(32)-C(33)   | 116.3(5) |
| N(3)-C(18)-C(19)  | 109.7(5) | C(31)-C(32)-C(34)   | 123.5(5) |
| C(19)-C(18)-C(17) | 126.2(5) | C(33)-C(32)-C(34)   | 120.2(5) |
| C(18)-C(19)-H(19) | 128.8    | C(29)-C(33)-H(33)   | 118.8    |
| C(18)-C(19)-C(20) | 102.4(7) | C(32)-C(33)-C(29)   | 122.3(6) |
| C(20)-C(19)-H(19) | 128.8    | C(32)-C(33)-H(33)   | 118.8    |
| C(19)-C(20)-H(20) | 124.9    | C(32)-C(34)-C(36)   | 107.4(5) |
| C(21)-C(20)-C(19) | 110.2(7) | C(35)-C(34)-C(32)   | 112.7(5) |
| C(21)-C(20)-H(20) | 124.9    | C(35)-C(34)-C(36)   | 109.3(5) |
| N(3)-C(21)-H(21)  | 125.6    | C(35)-C(34)-C(37)   | 108.3(5) |
| C(20)-C(21)-N(3)  | 108.8(7) | C(37)-C(34)-C(32)   | 110.4(4) |
| C(20)-C(21)-H(21) | 125.6    | C(37)-C(34)-C(36)   | 108.8(5) |
| N(1)-C(22)-C(17)  | 120.3(4) | C(34)-C(35)-H(35A)  | 109.5    |
| N(1)-C(22)-C(23)  | 107.5(4) | C(34)-C(35)-H(35B)  | 109.5    |
| C(17)-C(22)-C(23) | 132.2(5) | C(34)-C(35)-H(35C)  | 109.5    |
| C(22)-C(23)-C(26) | 128.4(5) | H(35A)-C(35)-H(35B) | 109.5    |
| C(24)-C(23)-C(22) | 107.0(4) | H(35A)-C(35)-H(35C) | 109.5    |
| C(24)-C(23)-C(26) | 124.2(5) | H(35B)-C(35)-H(35C) | 109.5    |
| C(23)-C(24)-H(24) | 126.8    | C(34)-C(36)-H(36A)  | 109.5    |
| C(25)-C(24)-C(23) | 106.4(5) | C(34)-C(36)-H(36B)  | 109.5    |
| C(25)-C(24)-H(24) | 126.8    | C(34)-C(36)-H(36C)  | 109.5    |
| N(1)-C(25)-C(24)  | 110.8(4) | H(36A)-C(36)-H(36B) | 109.5    |
| N(1)-C(25)-H(25)  | 124.6    | H(36A)-C(36)-H(36C) | 109.5    |
| C(24)-C(25)-H(25) | 124.6    | H(36B)-C(36)-H(36C) | 109.5    |
| C(27)-C(26)-C(23) | 173.7(7) | C(34)-C(37)-H(37A)  | 109.5    |
| C(26)-C(27)-C(28) | 176.2(7) | C(34)-C(37)-H(37B)  | 109.5    |
| C(29)-C(28)-C(27) | 120.9(5) | C(34)-C(37)-H(37C)  | 109.5    |
| C(29)-C(28)-C(30) | 117.6(5) | H(37A)-C(37)-H(37B) | 109.5    |
| C(30)-C(28)-C(27) | 121.5(5) | H(37A)-C(37)-H(37C) | 109.5    |
| C(28)-C(29)-H(29) | 119.7    | H(37B)-C(37)-H(37C) | 109.5    |
| C(28)-C(29)-C(33) | 120.6(6) | F(1)-B(1)-F(2)      | 110.2(5) |
| C(33)-C(29)-H(29) | 119.7    | F(1)-B(1)-N(1)      | 109.3(4) |



|                     |          |                     |          |
|---------------------|----------|---------------------|----------|
| F(1)-B(1)-N(2)      | 112.3(5) | C(43)-C(42)-C(44)   | 117.0(5) |
| F(2)-B(1)-N(1)      | 108.4(4) | C(44)-C(42)-C(40)   | 120.2(5) |
| F(2)-B(1)-N(2)      | 110.9(5) | C(42)-C(43)-H(43)   | 119.0    |
| N(2)-B(1)-N(1)      | 105.5(4) | C(46)-C(43)-C(42)   | 122.1(6) |
| C(55)-N(4)-H(4)     | 125.5    | C(46)-C(43)-H(43)   | 119.0    |
| C(58)-N(4)-H(4)     | 125.5    | C(42)-C(44)-H(44)   | 119.5    |
| C(58)-N(4)-C(55)    | 109.0(6) | C(42)-C(44)-C(45)   | 121.1(6) |
| C(60)-N(5)-B(2)     | 125.9(4) | C(45)-C(44)-H(44)   | 119.5    |
| C(63)-N(5)-C(60)    | 107.7(4) | C(44)-C(45)-H(45)   | 119.5    |
| C(63)-N(5)-B(2)     | 126.2(4) | C(47)-C(45)-C(44)   | 121.0(5) |
| C(52)-N(6)-C(53)    | 109.0(4) | C(47)-C(45)-H(45)   | 119.5    |
| C(52)-N(6)-B(2)     | 124.9(4) | C(43)-C(46)-H(46)   | 119.8    |
| C(53)-N(6)-B(2)     | 124.8(4) | C(43)-C(46)-C(47)   | 120.4(6) |
| H(38A)-C(38)-H(38B) | 109.5    | C(47)-C(46)-H(46)   | 119.8    |
| H(38A)-C(38)-H(38C) | 109.5    | C(45)-C(47)-C(46)   | 118.4(5) |
| H(38B)-C(38)-H(38C) | 109.5    | C(45)-C(47)-C(48)   | 120.7(5) |
| C(40)-C(38)-H(38A)  | 109.5    | C(46)-C(47)-C(48)   | 120.9(5) |
| C(40)-C(38)-H(38B)  | 109.5    | C(49)-C(48)-C(47)   | 177.9(6) |
| C(40)-C(38)-H(38C)  | 109.5    | C(48)-C(49)-C(50)   | 173.3(6) |
| H(39A)-C(39)-H(39B) | 109.5    | C(51)-C(50)-C(49)   | 123.8(5) |
| H(39A)-C(39)-H(39C) | 109.5    | C(51)-C(50)-C(53)   | 106.7(4) |
| H(39B)-C(39)-H(39C) | 109.5    | C(53)-C(50)-C(49)   | 129.1(5) |
| C(40)-C(39)-H(39A)  | 109.5    | C(50)-C(51)-H(51)   | 126.6    |
| C(40)-C(39)-H(39B)  | 109.5    | C(52)-C(51)-C(50)   | 106.8(5) |
| C(40)-C(39)-H(39C)  | 109.5    | C(52)-C(51)-H(51)   | 126.6    |
| C(38)-C(40)-C(41)   | 106.8(6) | N(6)-C(52)-C(51)    | 110.3(4) |
| C(39)-C(40)-C(38)   | 109.1(5) | N(6)-C(52)-H(52)    | 124.8    |
| C(39)-C(40)-C(41)   | 111.3(6) | C(51)-C(52)-H(52)   | 124.8    |
| C(39)-C(40)-C(42)   | 108.4(5) | N(6)-C(53)-C(50)    | 107.1(4) |
| C(42)-C(40)-C(38)   | 110.6(5) | N(6)-C(53)-C(54)    | 121.0(4) |
| C(42)-C(40)-C(41)   | 110.7(5) | C(54)-C(53)-C(50)   | 132.0(5) |
| C(40)-C(41)-H(41A)  | 109.5    | C(53)-C(54)-C(55)   | 120.5(5) |
| C(40)-C(41)-H(41B)  | 109.5    | C(53)-C(54)-C(60)   | 120.3(4) |
| C(40)-C(41)-H(41C)  | 109.5    | C(60)-C(54)-C(55)   | 119.2(4) |
| H(41A)-C(41)-H(41B) | 109.5    | N(4)-C(55)-C(54)    | 124.4(5) |
| H(41A)-C(41)-H(41C) | 109.5    | N(4)-C(55)-C(59)    | 109.0(5) |
| H(41B)-C(41)-H(41C) | 109.5    | C(59)-C(55)-C(54)   | 126.6(5) |
| C(43)-C(42)-C(40)   | 122.7(5) | H(56A)-C(56)-H(56B) | 109.5    |

|                     |          |                     |          |
|---------------------|----------|---------------------|----------|
| H(56A)-C(56)-H(56C) | 109.5    | C(70)-C(69)-C(68)   | 117.2(5) |
| H(56B)-C(56)-H(56C) | 109.5    | C(70)-C(69)-C(72)   | 123.8(5) |
| C(72)-C(56)-H(56A)  | 109.5    | C(69)-C(70)-H(70)   | 119.1    |
| C(72)-C(56)-H(56B)  | 109.5    | C(71)-C(70)-C(69)   | 121.9(5) |
| C(72)-C(56)-H(56C)  | 109.5    | C(71)-C(70)-H(70)   | 119.1    |
| C(58)-C(57)-H(57)   | 126.2    | C(66)-C(71)-H(71)   | 119.8    |
| C(58)-C(57)-C(59)   | 107.7(6) | C(70)-C(71)-C(66)   | 120.5(5) |
| C(59)-C(57)-H(57)   | 126.2    | C(70)-C(71)-H(71)   | 119.8    |
| N(4)-C(58)-C(57)    | 108.1(7) | C(56)-C(72)-C(69)   | 112.5(4) |
| N(4)-C(58)-H(58)    | 126.0    | C(56)-C(72)-C(74)   | 107.4(4) |
| C(57)-C(58)-H(58)   | 126.0    | C(69)-C(72)-C(74)   | 109.1(4) |
| C(55)-C(59)-C(57)   | 106.3(6) | C(73)-C(72)-C(56)   | 108.6(4) |
| C(55)-C(59)-H(59)   | 126.9    | C(73)-C(72)-C(69)   | 109.0(4) |
| C(57)-C(59)-H(59)   | 126.9    | C(73)-C(72)-C(74)   | 110.2(4) |
| N(5)-C(60)-C(54)    | 119.5(4) | C(72)-C(73)-H(73A)  | 109.5    |
| N(5)-C(60)-C(61)    | 108.2(4) | C(72)-C(73)-H(73B)  | 109.5    |
| C(54)-C(60)-C(61)   | 132.3(5) | C(72)-C(73)-H(73C)  | 109.5    |
| C(62)-C(61)-C(60)   | 106.4(4) | H(73A)-C(73)-H(73B) | 109.5    |
| C(64)-C(61)-C(60)   | 128.4(5) | H(73A)-C(73)-H(73C) | 109.5    |
| C(64)-C(61)-C(62)   | 125.0(5) | H(73B)-C(73)-H(73C) | 109.5    |
| C(61)-C(62)-H(62)   | 126.7    | C(72)-C(74)-H(74A)  | 109.5    |
| C(63)-C(62)-C(61)   | 106.5(4) | C(72)-C(74)-H(74B)  | 109.5    |
| C(63)-C(62)-H(62)   | 126.7    | C(72)-C(74)-H(74C)  | 109.5    |
| N(5)-C(63)-C(62)    | 111.0(4) | H(74A)-C(74)-H(74B) | 109.5    |
| N(5)-C(63)-H(63)    | 124.5    | H(74A)-C(74)-H(74C) | 109.5    |
| C(62)-C(63)-H(63)   | 124.5    | H(74B)-C(74)-H(74C) | 109.5    |
| C(65)-C(64)-C(61)   | 177.3(6) | F(3)-B(2)-F(4)      | 109.0(4) |
| C(64)-C(65)-C(66)   | 177.4(6) | F(3)-B(2)-N(5)      | 110.0(4) |
| C(67)-C(66)-C(65)   | 119.5(5) | F(3)-B(2)-N(6)      | 111.7(4) |
| C(67)-C(66)-C(71)   | 118.4(5) | F(4)-B(2)-N(5)      | 110.1(4) |
| C(71)-C(66)-C(65)   | 122.1(5) | F(4)-B(2)-N(6)      | 109.4(4) |
| C(66)-C(67)-H(67)   | 119.4    | N(5)-B(2)-N(6)      | 106.5(4) |
| C(66)-C(67)-C(68)   | 121.2(5) |                     |          |
| C(68)-C(67)-H(67)   | 119.4    |                     |          |
| C(67)-C(68)-H(68)   | 119.6    |                     |          |
| C(67)-C(68)-C(69)   | 120.8(5) |                     |          |
| C(69)-C(68)-H(68)   | 119.6    |                     |          |
| C(68)-C(69)-C(72)   | 119.1(5) |                     |          |

a)

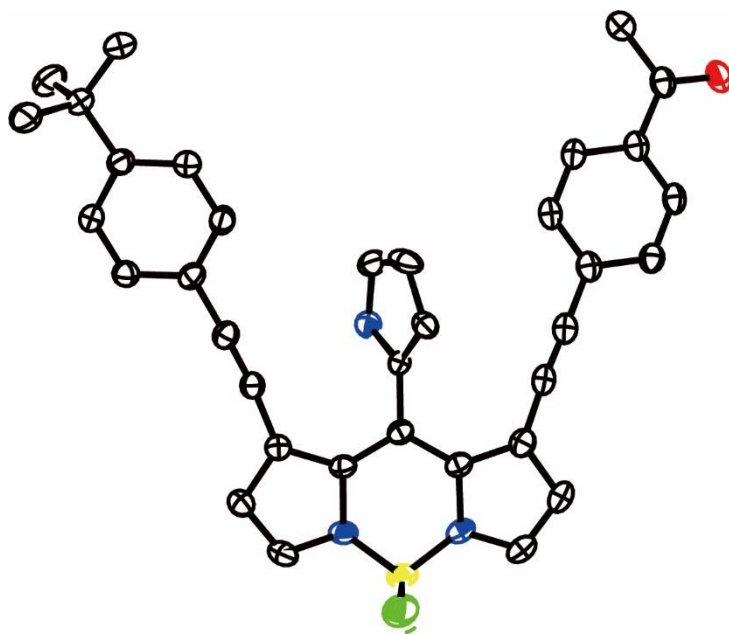

b)

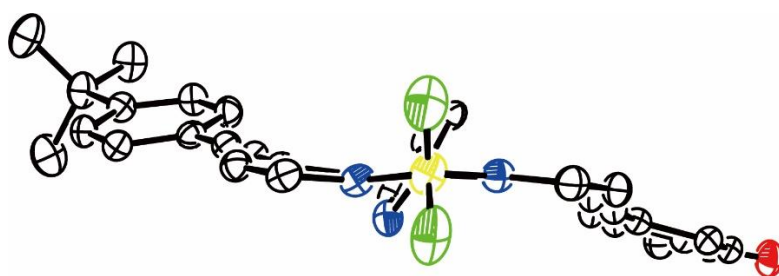

**Figure S72.** X-ray crystal structure of **5**: a) top view, b) side view. The thermal ellipsoids are 50% probability level. H atom and solvent molecules are omitted for clarity.

**Table S4.** X-ray Crystal Data for **5**.

|                                   |                                                                  |                 |
|-----------------------------------|------------------------------------------------------------------|-----------------|
| Identification code               | exp_3434                                                         |                 |
| Empirical formula                 | C <sub>35</sub> H <sub>28</sub> BF <sub>2</sub> N <sub>3</sub> O |                 |
| Formula weight                    | 555.41                                                           |                 |
| Temperature                       | 100.01(10) K                                                     |                 |
| Wavelength                        | 1.54184 Å                                                        |                 |
| Crystal system                    | Triclinic                                                        |                 |
| Space group                       | P-1                                                              |                 |
| Unit cell dimensions              | a = 9.9099(2) Å                                                  | α = 69.706(2)°. |
|                                   | b = 11.4408(3) Å                                                 | β = 87.070(2)°. |
|                                   | c = 13.8879(3) Å                                                 | γ = 78.071(2)°. |
| Volume                            | 1444.57(6) Å <sup>3</sup>                                        |                 |
| Z                                 | 2                                                                |                 |
| Density (calculated)              | 1.277 Mg/m <sup>3</sup>                                          |                 |
| Absorption coefficient            | 0.696 mm <sup>-1</sup>                                           |                 |
| F(000)                            | 580                                                              |                 |
| Crystal size                      | 0.3 x 0.1 x 0.1 mm <sup>3</sup>                                  |                 |
| Theta range for data collection   | 3.394 to 66.571°.                                                |                 |
| Index ranges                      | -11 ≤ h ≤ 11, -13 ≤ k ≤ 13, -16 ≤ l ≤ 16                         |                 |
| Reflections collected             | 18263                                                            |                 |
| Independent reflections           | 5097 [R(int) = 0.0180]                                           |                 |
| Completeness to theta = 66.571°   | 99.9 %                                                           |                 |
| Absorption correction             | Semi-empirical from equivalents                                  |                 |
| Max. and min. transmission        | 1.00000 and 0.83801                                              |                 |
| Refinement method                 | Full-matrix least-squares on F <sup>2</sup>                      |                 |
| Data / restraints / parameters    | 5097 / 12 / 383                                                  |                 |
| Goodness-of-fit on F <sup>2</sup> | 1.032                                                            |                 |
| Final R indices [I > 2σ(I)]       | R1 = 0.0400, wR2 = 0.1017                                        |                 |
| R indices (all data)              | R1 = 0.0433, wR2 = 0.1038                                        |                 |
| Extinction coefficient            | n/a                                                              |                 |
| Largest diff. peak and hole       | 0.342 and -0.296 e.Å <sup>-3</sup>                               |                 |
| CCDC                              | 2374386                                                          |                 |

**Table S5.** bond lengths (Å) and angles (°) for**5**

|             |            |                   |            |
|-------------|------------|-------------------|------------|
| F(1)-B(015) | 1.379(2)   | C(2)-C(1)         | 1.383(2)   |
| F(2)-B(015) | 1.385(2)   | C(10)-C(9)        | 1.400(2)   |
| O(1)-C(34)  | 1.2231(18) | C(10)-C(11)       | 1.393(2)   |
| N(2)-C(4)   | 1.3915(17) | C(10)-C(13)       | 1.532(2)   |
| N(2)-C(1)   | 1.344(2)   | C(34)-C(35)       | 1.498(2)   |
| N(2)-B(015) | 1.539(2)   | C(12)-C(11)       | 1.388(2)   |
| N(1)-C(22)  | 1.3915(18) | C(24)-C(23)       | 1.378(2)   |
| N(1)-C(23)  | 1.344(2)   | C(13)-C(14)       | 1.532(2)   |
| N(1)-B(015) | 1.545(2)   | C(13)-C(16)       | 1.537(2)   |
| N(3)-C(18)  | 1.3754(19) | C(13)-C(15)       | 1.530(2)   |
| N(3)-C(20)  | 1.357(2)   | C(20)-C(19)       | 1.356(3)   |
| C(0AA)-C(4) | 1.426(2)   | C(4)-N(2)-B(015)  | 125.98(13) |
| C(0AA)-C(5) | 1.4197(19) | C(1)-N(2)-C(4)    | 108.31(12) |
| C(0AA)-C(2) | 1.401(2)   | C(1)-N(2)-B(015)  | 124.21(13) |
| C(17)-C(4)  | 1.407(2)   | C(22)-N(1)-B(015) | 125.92(13) |
| C(17)-C(18) | 1.4606(19) | C(23)-N(1)-C(22)  | 108.16(13) |
| C(17)-C(22) | 1.404(2)   | C(23)-N(1)-B(015) | 125.72(13) |
| C(18)-C(21) | 1.374(2)   | C(20)-N(3)-C(18)  | 109.15(14) |
| C(22)-C(25) | 1.428(2)   | C(5)-C(0AA)-C(4)  | 129.24(13) |
| C(5)-C(6)   | 1.200(2)   | C(2)-C(0AA)-C(4)  | 106.91(12) |
| C(21)-C(19) | 1.424(2)   | C(2)-C(0AA)-C(5)  | 123.83(13) |
| C(28)-C(33) | 1.405(2)   | C(4)-C(17)-C(18)  | 120.05(12) |
| C(28)-C(26) | 1.430(2)   | C(22)-C(17)-C(4)  | 119.95(13) |
| C(28)-C(29) | 1.392(2)   | C(22)-C(17)-C(18) | 119.97(13) |
| C(32)-C(31) | 1.392(2)   | N(2)-C(4)-C(0AA)  | 107.15(12) |
| C(32)-C(33) | 1.376(2)   | N(2)-C(4)-C(17)   | 120.40(13) |
| C(27)-C(26) | 1.202(2)   | C(17)-C(4)-C(0AA) | 132.28(13) |
| C(27)-C(25) | 1.414(2)   | N(3)-C(18)-C(17)  | 124.28(13) |
| C(31)-C(30) | 1.398(2)   | C(21)-C(18)-N(3)  | 108.59(13) |
| C(31)-C(34) | 1.490(2)   | C(21)-C(18)-C(17) | 126.95(13) |
| C(6)-C(7)   | 1.432(2)   | N(1)-C(22)-C(17)  | 120.76(13) |
| C(30)-C(29) | 1.380(2)   | N(1)-C(22)-C(25)  | 107.31(12) |
| C(7)-C(8)   | 1.402(2)   | C(17)-C(22)-C(25) | 131.70(13) |
| C(7)-C(12)  | 1.395(2)   | C(6)-C(5)-C(0AA)  | 174.60(15) |
| C(8)-C(9)   | 1.381(2)   | C(18)-C(21)-C(19) | 105.54(14) |
| C(25)-C(24) | 1.398(2)   | C(33)-C(28)-C(26) | 120.47(14) |
|             |            | C(29)-C(28)-C(33) | 118.92(14) |
|             |            | C(29)-C(28)-C(26) | 120.61(13) |

|                   |            |                      |            |
|-------------------|------------|----------------------|------------|
| C(33)-C(32)-C(31) | 120.95(13) | F(1)-B(015)-F(2)     | 109.77(14) |
| C(26)-C(27)-C(25) | 174.98(16) | F(1)-B(015)-N(2)     | 110.25(15) |
| C(32)-C(31)-C(30) | 118.81(14) | F(1)-B(015)-N(1)     | 110.54(14) |
| C(32)-C(31)-C(34) | 119.61(13) | F(2)-B(015)-N(2)     | 109.72(14) |
| C(30)-C(31)-C(34) | 121.56(14) | F(2)-B(015)-N(1)     | 110.39(15) |
| C(32)-C(33)-C(28) | 120.19(14) | N(2)-B(015)-N(1)     | 106.12(12) |
| C(5)-C(6)-C(7)    | 178.00(16) | F(001)-B(00U)-N(005) | 111.3(5)   |
| C(27)-C(26)-C(28) | 177.42(16) | F(002)-B(00U)-F(001) | 109.4(5)   |
| C(29)-C(30)-C(31) | 120.56(14) | F(002)-B(00U)-N(004) | 110.2(5)   |
| C(8)-C(7)-C(6)    | 119.77(13) | F(002)-B(00U)-N(005) | 111.5(5)   |
| C(12)-C(7)-C(6)   | 121.93(14) | N(005)-B(00U)-N(004) | 104.9(5)   |
| C(12)-C(7)-C(8)   | 118.27(13) | C(2)-C(1)-C(6)       | 109.3(12)  |
| C(9)-C(8)-C(7)    | 120.49(14) | C(2)-C(1)-C(9)       | 114.0(14)  |
| C(27)-C(25)-C(22) | 128.27(14) | C(2)-C(1)-C(0AA)     | 108.2(13)  |
| C(24)-C(25)-C(22) | 106.50(13) | C(9)-C(1)-C(6)       | 102.9(12)  |
| C(24)-C(25)-C(27) | 124.98(14) | C(0AA)-C(1)-C(6)     | 109.1(13)  |
| C(1)-C(2)-C(0AA)  | 106.87(13) | C(0AA)-C(1)-C(9)     | 113.1(14)  |
| N(2)-C(1)-C(2)    | 110.75(13) | C(7)-C(8)-C(6)       | 120.0      |
| C(9)-C(10)-C(13)  | 119.64(13) | C(00Z)-C(7)-C(8)     | 120.0      |
| C(11)-C(10)-C(9)  | 117.19(13) | C(7)-C(00Z)-C(00T)   | 120.3(6)   |
| C(11)-C(10)-C(13) | 123.16(13) | C(7)-C(00Z)-C(00Y)   | 120.0      |
| O(1)-C(34)-C(31)  | 119.98(14) | C(00Y)-C(00Z)-C(00T) | 119.6(6)   |
| O(1)-C(34)-C(35)  | 120.62(14) | C(00Z)-C(00Y)-C(011) | 120.0      |
| C(31)-C(34)-C(35) | 119.38(13) | C(6)-C(011)-C(00Y)   | 120.0      |
| C(11)-C(12)-C(7)  | 120.50(14) | C(8)-C(6)-C(1)       | 123.4(9)   |
| C(8)-C(9)-C(10)   | 121.74(14) | C(011)-C(6)-C(1)     | 116.5(9)   |
| C(30)-C(29)-C(28) | 120.56(14) | C(011)-C(6)-C(8)     | 120.0      |
| C(12)-C(11)-C(10) | 121.74(14) |                      |            |
| C(23)-C(24)-C(25) | 107.35(14) |                      |            |
| N(1)-C(23)-C(24)  | 110.67(13) |                      |            |
| C(10)-C(13)-C(16) | 109.15(13) |                      |            |
| C(14)-C(13)-C(10) | 111.89(13) |                      |            |
| C(14)-C(13)-C(16) | 108.05(14) |                      |            |
| C(15)-C(13)-C(10) | 109.36(14) |                      |            |
| C(15)-C(13)-C(14) | 108.80(14) |                      |            |
| C(15)-C(13)-C(16) | 109.56(15) |                      |            |
| C(19)-C(20)-N(3)  | 108.01(14) |                      |            |
| C(20)-C(19)-C(21) | 108.67(14) |                      |            |

a)

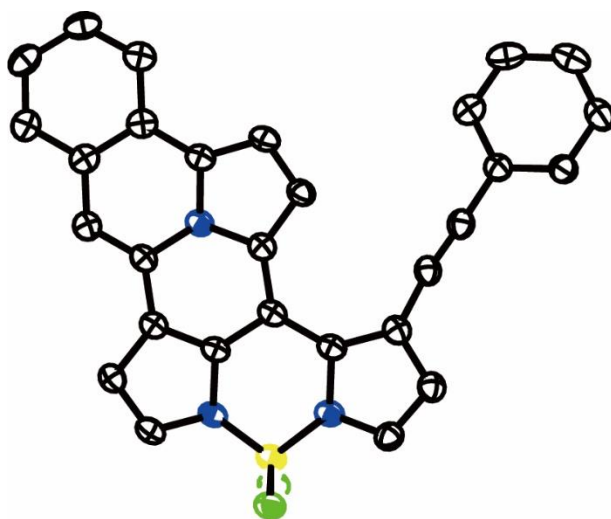

b)

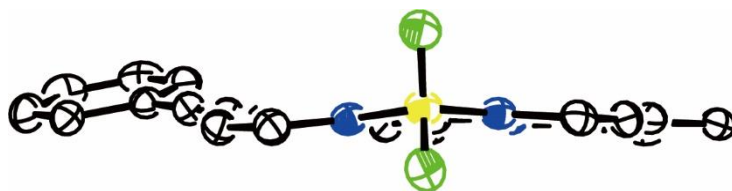

**Figure S73.** X-ray crystal structure of **9**: a) top view, b) side view. The thermal ellipsoids are 50% probability level. H atom and solvent molecules are omitted for clarity.

**Table S6.** X-ray Crystal Data for **9**.

|                                   |                                             |                              |
|-----------------------------------|---------------------------------------------|------------------------------|
| Identification code               | exp_1730                                    |                              |
| Empirical formula                 | $C_{37}H_{32}BF_2N_3$                       |                              |
| Formula weight                    | 567.26                                      |                              |
| Temperature                       | 100.3(8) K                                  |                              |
| Wavelength                        | 1.54184 Å                                   |                              |
| Crystal system                    | Monoclinic                                  |                              |
| Space group                       | P 1 21/c 1                                  |                              |
| Unit cell dimensions              | a = 14.2196(5) Å                            | $\alpha = 90^\circ$ .        |
|                                   | b = 7.5050(2) Å                             | $\beta = 109.003(4)^\circ$ . |
|                                   | c = 20.4147(7) Å                            | $\gamma = 90^\circ$ .        |
| Volume                            | 2059.89(12) Å <sup>3</sup>                  |                              |
| Z                                 | 4                                           |                              |
| Density (calculated)              | 1.468 Mg/m <sup>3</sup>                     |                              |
| Absorption coefficient            | 0.811 mm <sup>-1</sup>                      |                              |
| F(000)                            | 936                                         |                              |
| Crystal size                      | 0.3 x 0.2 x 0.1 mm <sup>3</sup>             |                              |
| Theta range for data collection   | 3.287 to 66.576°.                           |                              |
| Index ranges                      | -11 ≤ h ≤ 16, -8 ≤ k ≤ 8, -24 ≤ l ≤ 19      |                              |
| Reflections collected             | 7016                                        |                              |
| Independent reflections           | 3627 [R(int) = 0.0308]                      |                              |
| Completeness to theta = 66.576°   | 99.9 %                                      |                              |
| Absorption correction             | Semi-empirical from equivalents             |                              |
| Max. and min. transmission        | 1.00000 and 0.76303                         |                              |
| Refinement method                 | Full-matrix least-squares on F <sup>2</sup> |                              |
| Data / restraints / parameters    | 3627 / 0 / 316                              |                              |
| Goodness-of-fit on F <sup>2</sup> | 1.055                                       |                              |
| Final R indices [I > 2σ(I)]       | R1 = 0.0481, wR2 = 0.1189                   |                              |
| R indices (all data)              | R1 = 0.0631, wR2 = 0.1301                   |                              |
| Extinction coefficient            | n/a                                         |                              |
| Largest diff. peak and hole       | 0.302 and -0.252 e.Å <sup>-3</sup>          |                              |
| CCDC                              | 2374387                                     |                              |



**Table S7.** bond lengths (Å) and angles (°) for**9**

|              |          |                   |            |
|--------------|----------|-------------------|------------|
| F(2)-B(1)    | 1.385(3) | C(20)-C(19)       | 1.365(3)   |
| F(1)-B(1)    | 1.391(3) | C(23)-H(23)       | 0.9300     |
| N(2)-C(4)    | 1.369(2) | C(23)-C(24)       | 1.364(3)   |
| N(2)-C(1)    | 1.358(3) | C(8)-H(8)         | 0.9300     |
| N(2)-B(1)    | 1.537(3) | C(8)-C(9)         | 1.369(3)   |
| N(3)-C(18)   | 1.405(3) | C(9)-H(9)         | 0.9300     |
| N(3)-C(21)   | 1.379(3) | C(2)-H(2)         | 0.9300     |
| N(3)-C(29)   | 1.396(3) | C(19)-H(19)       | 0.9300     |
| N(1)-C(6)    | 1.393(2) | C(13)-H(13)       | 0.9300     |
| N(1)-C(9)    | 1.348(3) | C(13)-C(14)       | 1.385(3)   |
| N(1)-B(1)    | 1.554(3) | C(17)-H(17)       | 0.9300     |
| C(4)-C(0AA)  | 1.400(3) | C(17)-C(16)       | 1.381(3)   |
| C(4)-C(5)    | 1.421(3) | C(26)-H(26)       | 0.9300     |
| C(0AA)-C(29) | 1.424(3) | C(26)-C(25)       | 1.369(3)   |
| C(0AA)-C(2)  | 1.414(3) | C(25)-H(25)       | 0.9300     |
| C(6)-C(5)    | 1.440(3) | C(25)-C(24)       | 1.418(3)   |
| C(6)-C(7)    | 1.420(3) | C(24)-H(24)       | 0.9300     |
| C(18)-C(5)   | 1.415(3) | C(14)-H(14)       | 0.9300     |
| C(18)-C(19)  | 1.410(3) | C(14)-C(15)       | 1.382(4)   |
| C(21)-C(22)  | 1.421(3) | C(16)-H(16)       | 0.9300     |
| C(21)-C(20)  | 1.408(3) | C(16)-C(15)       | 1.379(4)   |
| C(29)-C(28)  | 1.371(3) | C(15)-H(15)       | 0.9300     |
| C(22)-C(27)  | 1.426(3) | C(4)-N(2)-B(1)    | 123.99(17) |
| C(22)-C(23)  | 1.407(3) | C(1)-N(2)-C(4)    | 107.06(17) |
| C(27)-C(28)  | 1.414(3) | C(1)-N(2)-B(1)    | 128.95(17) |
| C(27)-C(26)  | 1.417(3) | C(21)-N(3)-C(18)  | 110.15(17) |
| C(12)-C(11)  | 1.432(3) | C(21)-N(3)-C(29)  | 122.89(18) |
| C(12)-C(13)  | 1.403(3) | C(29)-N(3)-C(18)  | 126.91(17) |
| C(12)-C(17)  | 1.395(3) | C(6)-N(1)-B(1)    | 128.76(17) |
| C(1)-H(1)    | 0.9300   | C(9)-N(1)-C(6)    | 109.04(17) |
| C(1)-C(2)    | 1.367(3) | C(9)-N(1)-B(1)    | 121.95(17) |
| C(10)-C(7)   | 1.414(3) | N(2)-C(4)-C(0AA)  | 108.89(17) |
| C(10)-C(11)  | 1.208(3) | N(2)-C(4)-C(5)    | 125.07(19) |
| C(7)-C(8)    | 1.406(3) | C(0AA)-C(4)-C(5)  | 125.97(19) |
| C(28)-H(28)  | 0.9300   | C(4)-C(0AA)-C(29) | 120.02(18) |
| C(20)-H(20)  | 0.9300   | C(4)-C(0AA)-C(2)  | 106.72(18) |
|              |          | C(2)-C(0AA)-C(29) | 133.23(19) |

|                    |            |                   |            |
|--------------------|------------|-------------------|------------|
| N(1)-C(6)-C(5)     | 117.83(17) | C(22)-C(23)-H(23) | 119.8      |
| N(1)-C(6)-C(7)     | 106.55(17) | C(24)-C(23)-C(22) | 120.4(2)   |
| C(7)-C(6)-C(5)     | 135.45(18) | C(24)-C(23)-H(23) | 119.8      |
| N(3)-C(18)-C(5)    | 119.76(18) | C(7)-C(8)-H(8)    | 126.2      |
| N(3)-C(18)-C(19)   | 104.93(17) | C(9)-C(8)-C(7)    | 107.63(19) |
| C(19)-C(18)-C(5)   | 135.3(2)   | C(9)-C(8)-H(8)    | 126.2      |
| C(4)-C(5)-C(6)     | 117.60(18) | N(1)-C(9)-C(8)    | 109.92(19) |
| C(18)-C(5)-C(4)    | 113.67(18) | N(1)-C(9)-H(9)    | 125.0      |
| C(18)-C(5)-C(6)    | 128.64(18) | C(8)-C(9)-H(9)    | 125.0      |
| N(3)-C(21)-C(22)   | 119.58(18) | C(0AA)-C(2)-H(2)  | 127.0      |
| N(3)-C(21)-C(20)   | 106.90(18) | C(1)-C(2)-C(0AA)  | 105.97(19) |
| C(20)-C(21)-C(22)  | 133.52(19) | C(1)-C(2)-H(2)    | 127.0      |
| N(3)-C(29)-C(0AA)  | 113.59(18) | C(18)-C(19)-H(19) | 125.0      |
| C(28)-C(29)-N(3)   | 118.00(18) | C(20)-C(19)-C(18) | 109.96(19) |
| C(28)-C(29)-C(0AA) | 128.40(19) | C(20)-C(19)-H(19) | 125.0      |
| C(21)-C(22)-C(27)  | 118.13(19) | C(12)-C(13)-H(13) | 120.1      |
| C(23)-C(22)-C(21)  | 122.3(2)   | C(14)-C(13)-C(12) | 119.9(2)   |
| C(23)-C(22)-C(27)  | 119.5(2)   | C(14)-C(13)-H(13) | 120.1      |
| C(28)-C(27)-C(22)  | 119.4(2)   | C(12)-C(17)-H(17) | 119.6      |
| C(28)-C(27)-C(26)  | 121.9(2)   | C(16)-C(17)-C(12) | 120.7(2)   |
| C(26)-C(27)-C(22)  | 118.7(2)   | C(16)-C(17)-H(17) | 119.6      |
| C(13)-C(12)-C(11)  | 121.0(2)   | C(27)-C(26)-H(26) | 119.7      |
| C(17)-C(12)-C(11)  | 120.24(19) | C(25)-C(26)-C(27) | 120.6(2)   |
| C(17)-C(12)-C(13)  | 118.8(2)   | C(25)-C(26)-H(26) | 119.7      |
| N(2)-C(1)-H(1)     | 124.3      | C(26)-C(25)-H(25) | 120.0      |
| N(2)-C(1)-C(2)     | 111.34(18) | C(26)-C(25)-C(24) | 120.0(2)   |
| C(2)-C(1)-H(1)     | 124.3      | C(24)-C(25)-H(25) | 120.0      |
| C(11)-C(10)-C(7)   | 172.4(2)   | C(23)-C(24)-C(25) | 120.7(2)   |
| C(10)-C(7)-C(6)    | 132.03(19) | C(23)-C(24)-H(24) | 119.6      |
| C(8)-C(7)-C(6)     | 106.84(18) | C(25)-C(24)-H(24) | 119.6      |
| C(8)-C(7)-C(10)    | 121.11(19) | C(13)-C(14)-H(14) | 119.8      |
| C(29)-C(28)-C(27)  | 122.0(2)   | C(15)-C(14)-C(13) | 120.5(2)   |
| C(29)-C(28)-H(28)  | 119.0      | C(15)-C(14)-H(14) | 119.8      |
| C(27)-C(28)-H(28)  | 119.0      | C(17)-C(16)-H(16) | 120.0      |
| C(10)-C(11)-C(12)  | 178.1(2)   | C(15)-C(16)-C(17) | 120.0(2)   |
| C(21)-C(20)-H(20)  | 126.0      | C(15)-C(16)-H(16) | 120.0      |
| C(19)-C(20)-C(21)  | 108.06(18) | C(14)-C(15)-H(15) | 119.9      |
| C(19)-C(20)-H(20)  | 126.0      | C(16)-C(15)-C(14) | 120.1(2)   |

|                   |            |
|-------------------|------------|
| C(16)-C(15)-H(15) | 119.9      |
| F(2)-B(1)-F(1)    | 109.16(17) |
| F(2)-B(1)-N(2)    | 111.12(18) |
| F(2)-B(1)-N(1)    | 110.88(18) |
| F(1)-B(1)-N(2)    | 110.14(18) |
| F(1)-B(1)-N(1)    | 110.07(18) |
| N(2)-B(1)-N(1)    | 105.43(16) |

## 6. HR-MALDI-TOF mass data

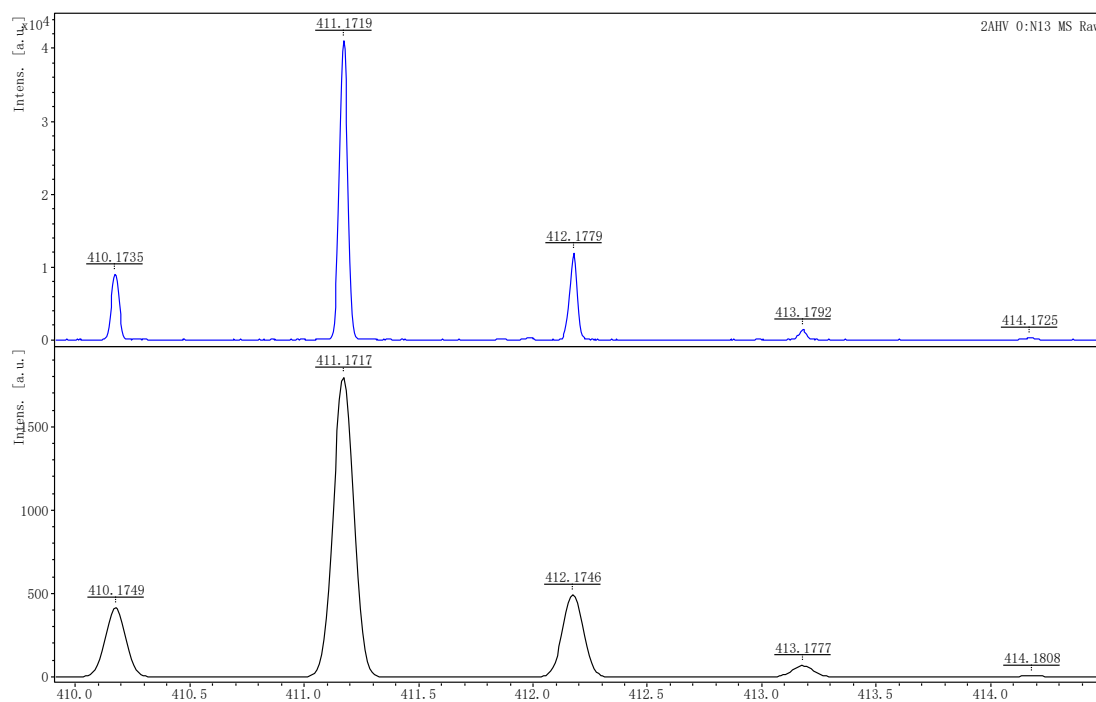

Figure S74. Observed (top) and simulated (bottom) HR-MALDI-TOF mass spectra of 7.

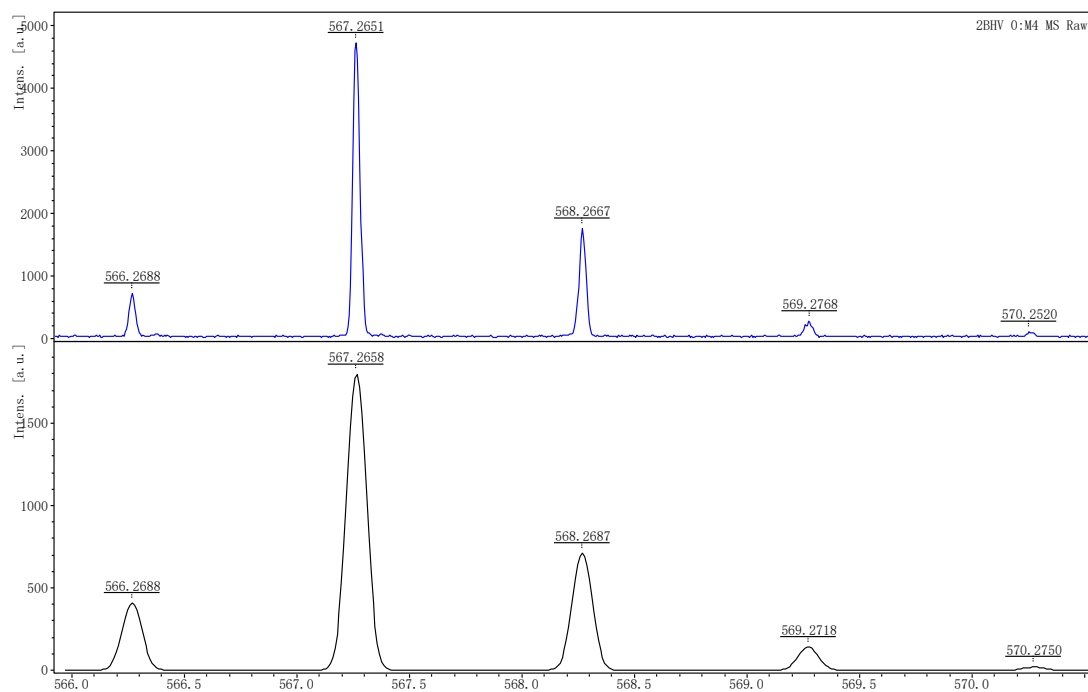

Figure S75 Observed (top) and simulated (bottom) HR-MALDI-TOF mass spectra of 8.

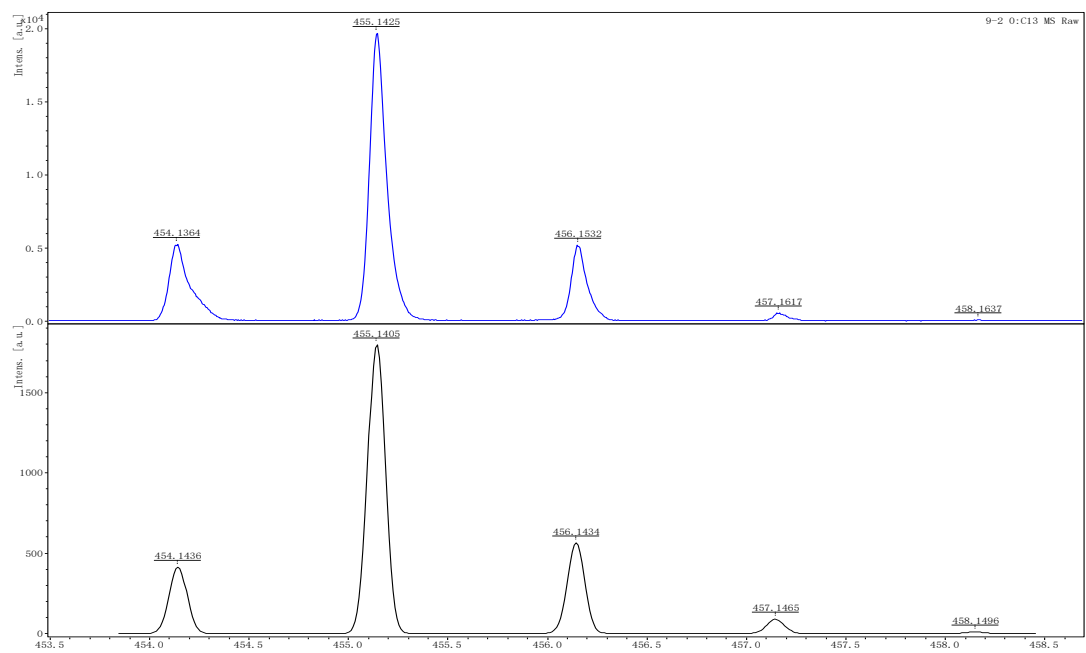

**Figure S76.** Observed (top) and simulated (bottom) HR-MALDI-TOF mass spectra of **9**.

## 7. References

- [S1] B. Umasekhar, E. Ganapathi, T. Chatterjee, M. Ravikanth, Synthesis, Structure, and Spectral, Electrochemical and Fluoride Sensing Properties of meso-Pyrrolyl Boron Dipyrromethene. *Dalton Trans.* **2015**, *44*, 16516-16527.
- [S2] V. Leen, P. Yuan, L. Wang, N. Boens, W. Dehaen, Synthesis of Meso-Halogenated BODIPYs and Access to Meso-Substituted Analogues. *Org. Lett.* **2012**, *14*, 6150-6153.
- [S3] T. Jiang, P. Zhang, C. Yu, J. Yin, L. Jiao, E. Dai, J. Wang, Y. Wei, X. Mu, E. Hao, Straightforward Synthesis of Oligopyrroles through a Regioselective S<sub>N</sub>Ar Reaction of Pyrroles and Halogenated Boron Dipyrins. *Org. Lett.* **2014**, *16*, 1952-1955.
- [S4] A. J. Gómez-Infante, J. Bañuelos, I. Valois-Escamilla, D. Cruz-Cruz, R. Prieto-Montero, I. López-Arbeloa, T. Arbeloa, E. Peña-Cabrera, Synthesis, Properties, and Functionalization of Non-symmetric 8-MethylthioBODIPYs. *Eur. J. Org. Chem.* **2016**, 5009-5023.
- [S5] M. J. Plater, S. Aiken, G. Bourhill, A new synthetic route to donor-acceptor porphyrins. *Tetrahedron* **2002**, *58*, 2405-2413.
- [S6] H. Shu, M. Guo, M. Wang, S. Fan, M. Zhou, L. Xu, Y. Rao, A. Osuka, J. Song, Rhodium-Catalyzed [5+2] Annulation of Pyrrole Appended BODIPYs: Access to Azepine-Fused BODIPYs. *Org. Lett.* **2023**, *25*, 1817-1822.
- [S7] Y. Zhang, R. P. Hsung, M. R. Tracey, K. C. M. Kurtz, E. L. Vera, Copper Sulfate-Pentahydrate-1,10-Phenanthroline Catalyzed Amidations of Alkynyl Bromides. Synthesis of Heteroaromatic Amine Substituted Ynamides. *Org. Lett.* **2004**, *6*, 1151-1154.
- [S8] Y. Gao, G. Wu, Q. Zhou and J. Wang, Palladium-Catalyzed Oxygenative Cross-Coupling of Ynamides and Benzyl Bromides by Carbene Migratory Insertion. *Angew. Chem. Int. Ed.* **2018**, *57*, 2716-2720.
- [S9] B. Xiao, X. Huang, Y. Rao, L. Xu, B. Yin, A. Osuka, J. Song, Axially Arylene-bridged “Dumbbell” B(III)-Subporphyrin Dimers and a Tetrameric Subporphyrin Nanocage. *Chem. Asian J.* **2022**, *17*, e202101406.
- [S10] O. V. Dolomanov, L. J. Bourhis, R. J. Gildea, J. A. K. Howard and H. Puschmann, OLEX2: A complete structure solution, refinement and analysis program *J. Appl. Cryst.*, **2009**, *42*, 339-341.
- [S11] L. J. Bourhis, O. V. Dolomanov, R. J. Gildea, J. A. K. Howard and H. Puschmann, The anatomy of a comprehensive constrained, restrained refinement program for the modern computing environment-Olex2 dissected, *Acta Cryst.*, **2015**, *A71*, 59-75.
- [S12] G. M. Sheldrick, Crystal structure refinement with SHELXL *Acta Cryst.*, **2015**, *C71*, 3-8.
